# Supplementary material for: Interaction of lipid accumulation product and family history of hypertension on hypertension risk: a cross-sectional study in the Southern Chinese population
Source: PubMed Central journal article supplement — BMJ Open. 2019 Nov 28;9(11):e029253. doi: 10.1136/bmjopen-2019-029253 (PMC6924775; doi:10.1136/bmjopen-2019-029253), 2019-11-28
Supplement: bmjopen-2019-029253.draft_revisions.pdf [file bmjopen-2019-029253.draft_revisions.pdf]

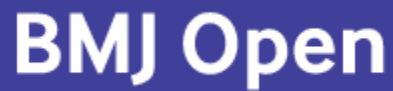

BMJ Open is committed to open peer review. As part of this commitment we make the peer review history of every article we publish publicly available.

When an article is published we post the peer reviewers' comments and the authors' responses online. We also post the versions of the paper that were used during peer review. These are the versions that the peer review comments apply to.

The versions of the paper that follow are the versions that were submitted during the peer review process. They are not the versions of record or the final published versions. They should not be cited or distributed as the published version of this manuscript.

BMJ Open is an open access journal and the full, final, typeset and author-corrected version of record of the manuscript is available on our site with no access controls, subscription charges or pay-per-view fees (<http://bmjopen.bmj.com>).

If you have any questions on BMJ Open's open peer review process please email [info.bmjopen@bmj.com](mailto:info.bmjopen@bmj.com)

# BMJ Open

## Interaction of lipid accumulation product and family history of hypertension on hypertension risk: A cross-sectional study in the Southern Chinese population

|                               |                                                                                                                                                                                                                                                                                                                                                                                                                                                                 |
|-------------------------------|-----------------------------------------------------------------------------------------------------------------------------------------------------------------------------------------------------------------------------------------------------------------------------------------------------------------------------------------------------------------------------------------------------------------------------------------------------------------|
| Journal:                      | <i>BMJ Open</i>                                                                                                                                                                                                                                                                                                                                                                                                                                                 |
| Manuscript ID                 | bmjopen-2019-029253                                                                                                                                                                                                                                                                                                                                                                                                                                             |
| Article Type:                 | Research                                                                                                                                                                                                                                                                                                                                                                                                                                                        |
| Date Submitted by the Author: | 18-Jan-2019                                                                                                                                                                                                                                                                                                                                                                                                                                                     |
| Complete List of Authors:     | Huang, junxuan; Guangzhou Medical University<br>Bao, XinYu; Guangzhou Medical University<br>Xie, yixian; Guangzhou Medical University<br>Zhang, xiaoxia; Guangzhou Medical University<br>Peng, xin; Guangzhou Medical University<br>Liu, yan; Guangzhou Medical University<br>Cheng, mengjiao; Guangzhou Medical University<br>Ma, JinXiang; Guangzhou Medical University<br>wang, peixi; General Practice Center, Nanhai Hospital, Southern Medical University |
| Keywords:                     | Hypertension < CARDIOLOGY, LAP, Family history, Interaction effect                                                                                                                                                                                                                                                                                                                                                                                              |
|                               |                                                                                                                                                                                                                                                                                                                                                                                                                                                                 |

SCHOLARONE™  
Manuscripts

1

2

3

4

5

6

7

8

9

10

11

12

13

14

15

16

17

18

19

20

21

22

23

24

25

26

27

28

29

30

31

32

33

34

35

36

37

38

39

40

41

42

43

44

45

46

47

48

49

50

51

52

53

54

55

56

57

58

59

60

1

2

3

4

5

6

7

8

9

10

11

12

13

14

15

16

17

18

19

20

21

22

23

24

25

26

27

28

29

30

31

32

33

34

35

36

37

38

39

40

41

42

43

44

45

46

47

48

49

50

51

52

53

54

55

56

57

58

59

60

**Interaction of lipid accumulation product and family history of hypertension on hypertension risk: A cross-sectional study in the Southern Chinese population**

Jun-Xuan Huang<sup>1</sup>, Xin-Yu Bao<sup>1</sup>, Yi-Xian Xie<sup>1</sup>, Xiao-Xia Zhang<sup>1</sup>, Xin Peng<sup>1</sup>, Yan Liu<sup>1</sup>, Meng-Jiao Cheng<sup>1</sup>, Jin-Xiang Ma<sup>1</sup> and Pei-Xi Wang<sup>2</sup>

**Institution address:**

<sup>1</sup>Department of Preventive Medicine, School of Public Health, Guangzhou Medical University, Guangzhou, 511436, China.

<sup>2</sup>General Practice Center, Nanhai Hospital, Southern Medical University, Foshan, 528244, China.

**Email address:**

circle\_wong@yeah.net (J.-X.H.); 1027473041@qq.com (X.-Y.B.); yixian.xie@yahoo.com (Y.-X.X.); zhangxiaoxia405@163.com (X.-X.Z.); 609167985@qq.com (X.P.); 1763136904@qq.com (Y.L.); 15700727758@163.com (M.-J.C.); mjx777108@hotmail.com (J.-X.M.); peixi001@163.com (P.-X.W.)

\* Author to whom correspondence should be addressed; E-mail: mjx777108@hotmail.com, peixi001@163.com

## 1 ABSTRACT

2 **Objectives:** This study aimed to investigate the applicability of lipid accumulation  
3 product (LAP) in the Southern Chinese population and compare the predictive effects  
4 of LAP and other obesity indicators on hypertension risk. Moreover, this study  
5 investigated the interactive effects of LAP and family history of hypertension.

6 **Methods:** A total of 2079 community-dwelling adults in Southern China were  
7 enrolled in this cross-sectional study. The participants underwent the questionnaire  
8 survey, anthropometric tests, and laboratory examinations. The multivariate logistic  
9 regression model and receiver operating characteristic (ROC) curves were used to  
10 assess the association between hypertension risk and obesity indexes, including LAP,  
11 body mass index (BMI) and waist-hip ratio (WHR). The interaction effects were  
12 evaluated by relative excess risk of interaction (RERI), attributable proportion due to  
13 interaction (AP), and synergy index (SI).

14 **Results:** Higher LAP levels had relatively higher risk of hypertension (adjusted odds  
15 ratio [OR] = 3.19 per SD increase; 95% confidence interval [CI] = 1.90–5.35;  $P <$   
16 0.001). LAP (area under curve [AUC] = 0.721; 95% CI: 0.680–0.761) was a better  
17 indicator in indentifying hypertension risk than BMI (AUC = 0.698; 95% CI: 0.658–  
18 0.737) and WHR (AUC = 0.684; 95% CI: 0.643–0.726) in females, but BMI  
19 performed better in males. A significant interaction between LAP and family history  
20 of hypertension was observed in males (RERI = 1.652, 95% CI: 0.267–3.037; AP =  
21 0.516, 95% CI: 0.238–0.794; SI = 3.998, 95% CI: 0.897–17.820) but not in females.

22 **Conclusions:** LAP was significantly associated with the hypertension risk in the  
23 Southern Chinese population, and LAP performed better on hypertension risk than did  
24 BMI and WHR in the Southern China female population. The synergistic effect of  
25 LAP and family history of hypertension was demonstrated in males, but further  
26 studies are needed to investigate in females.

27 **Keywords:** Hypertension, LAP, Family history, Interaction effect

1  
2  
3  
4  
5  
6  
7  
8  
9  
10  
11  
12  
13  
14  
15  
16  
17  
18  
19  
20  
21  
22  
23  
24  
25  
26  
27  
28  
29  
30  
31  
32  
33  
34  
35  
36  
37  
38  
39  
40  
41  
42  
43  
44  
45  
46  
47  
48  
49  
50  
51  
52  
53  
54  
55  
56  
57  
58  
59  
60

1       **Strengths and limitations of this study**

2       To the best of our knowledge, our study is the first to examine the validity of LAP,  
3       which was calculated using a modified formula, in the Southern China population. In  
4       addition, this study has some limitations. First, because this is a cross-sectional study,  
5       the results are not sufficient to indicate causality. Second, because of the small sample  
6       size in this study, further studies with a larger sample size are needed to investigate  
7       whether the modified LAP applies to all the residents dwelling in Southern China.

## 1 INTRODUCTION

2 Hypertension, a significant risk factor of cardiovascular disease,<sup>1</sup> is one of the most  
3 prevalent public health problems in the world, and it is the leading contributor to the  
4 global burden of disease and mortality. Nowadays, one-third of adults are suffering  
5 from hypertension in China, and the number of adults with hypertension in the world  
6 is being predicted to increase by about 60% to a total of 1.56 billion in 2025.<sup>2, 3</sup>

7 Accumulating evidence proves that obesity, especially visceral fat, and family  
8 history of hypertension could significantly contribute to hypertension.<sup>4-6</sup> Numerous  
9 studies have demonstrated that positive family history is an important risk factor for  
10 hypertension.<sup>6-9</sup> When it comes to obesity, the indexes that are most frequently used to  
11 assess obesity are body mass index (BMI), waist circumference (WC), and waist-hip  
12 ratio (WHR); however, these traditional obesity indexes can merely reflect the  
13 degrees of overweight and abdominal obesity but cannot distinguish between  
14 subcutaneous fat and visceral fat.<sup>10</sup> Micromagnetic resonance imaging and  
15 microcomputed tomography, the gold standard measurement methods of visceral fat,  
16 are not only inconvenient but also expensive;<sup>11</sup> moreover, they are not suitable for  
17 large-scale epidemiological investigations. Therefore, it is necessary for us to identify  
18 a new obesity indicator that can distinguish visceral fat from subcutaneous fat  
19 conveniently and economically.

20 Recently, increasing attention has been directed towards lipid accumulation product  
21 (LAP). LAP, a new obesity index computed from WC and triglyceride (TG), has been  
22 shown to be a useful indicator of visceral fat,<sup>12</sup> as demonstrated by Kahn in 2005<sup>13</sup>.  
23 Some studies suggest that LAP can also be used to identify metabolic syndromes,<sup>14</sup>  
24 type 2 diabetes mellitus,<sup>15</sup> and stroke.<sup>16</sup> Additionally, several cross-sectional studies  
25 conducted in Japan,<sup>17</sup> India,<sup>14</sup> and Brazil indicate that LAP is significantly associated  
26 with cardiovascular disease and is a better indicator than BMI for identifying the  
27 cardiovascular risk.<sup>13, 18</sup> A few national studies have investigated the association  
28 between LAP and hypertension in China, and all of them were conducted in northern  
29 China, including Bengbu,<sup>19</sup> Beijing,<sup>20</sup> and Inner Mongolia.<sup>21</sup> Owing to considerable

1  
2  
3  
4  
5  
6  
7  
8  
9  
10  
11  
12  
13  
14  
15  
16  
17  
18  
19  
20  
21  
22  
23  
24  
25  
26  
27  
28  
29  
30  
31  
32  
33  
34  
35  
36  
37  
38  
39  
40  
41  
42  
43  
44  
45  
46  
47  
48  
49  
50  
51  
52  
53  
54  
55  
56  
57  
58  
59  
60

1 differences in climate, environment, and lifestyle between the south area and the north  
2 area of China, the prevalence of hypertension and the levels of LAP should be  
3 different. However, rare studies have compared LAP with other obesity indexes in the  
4 Southern Chinese population. In addition, almost all studies about LAP used the  
5 formula that was developed based on the third National Health and Nutrition  
6 Examination Survey in the US. Therefore, it is reasonable to suggest that the  
7 calculation formula of LAP needs to be modified in the Chinese population.

8 To the best of our knowledge, no studies have attempted to adjust the calculation  
9 formula of LAP so that it can apply to the Southern Chinese population, and rare  
10 studies have explored additive interactions between family history of hypertension  
11 and LAP. Thus, the primary purpose of this study was to assess interactive effects  
12 between adjusted LAP and family history of hypertension to predict the hypertension  
13 risk in the Southern Chinese population.

14 **METHODS**

15 **Study design and subjects**

16 A cross-sectional survey based on community health was conducted in Southern  
17 China. Recruiting the enrollers took place in March 2017. The study samples were  
18 selected by a multistage and stratified random sampling method. A total of 3760  
19 individuals were enrolled in this study; among them, 1681 participants who lacked  
20 complete data on demographic characteristics, anthropometric tests, or laboratory  
21 examinations were excluded. Finally, 2079 adults who had complete data were  
22 included in the analysis.

23 **Patient and public involvement**

24 Patients or public were not involved in this study.

25 **Ethics statement**

26 This study was approved by the Ethics Committee of Guangzhou Medical University.  
27 Written informed consent was obtained from each study participant before  
28 investigation.

## 1 General study questionnaire

2 An interview-based survey was performed using a questionnaire by trained staff.  
3 Socio-demographic data, family history of hypertension, cigarette smoking, and  
4 alcohol drinking were investigated. Smokers were defined as the participants smoking  
5 at least 1 cigarette/day for at least 6 months. Drinkers were defined as individuals  
6 consuming at least 30 ml alcohol/week for 1 year or more. Physical activities were  
7 divided into “seldom or never,” “moderate,” and “high.” Participants with “seldom or  
8 never” were defined as those who performed activity less than 2 times per week.  
9 Participants with “moderate” were defined as those who exercised for more than 30  
10 minutes each time, 3–5 times per week. Participants with “high” were defined as  
11 those who exercised for more than 30 minutes each time, more than 6 times per week.  
12 Marital status was classified as “currently not married” and “currently married”;  
13 “married” was regarded as “currently married,” and “divorced/widowed/single” was  
14 regarded as “currently not married.” Educational level was categorized as “elementary  
15 school or lower,” “secondary school,” and “senior high school or higher.”

## 16 Anthropometric tests and laboratory examinations

17 The participants were required to take off their shoes and wear lightweight clothing  
18 for weight and height measurements. WC was measured at the level of 1 cm above the  
19 navel.<sup>22</sup> Automatic sphygmomanometer (OMRON, hem-7125) was used to measure  
20 blood pressure (BP) of participants. BP measurement was conducted thrice in a quiet  
21 environment, and the participants rested at least one minute between each time of  
22 measurement. The mean of the three measurements was used in the analysis.  
23 Prehypertension was defined as systolic blood pressure (SBP) of 120–139 mmHg  
24 and/or diastolic blood pressure (DBP) of 80–89 mmHg, and hypertension was defined  
25 as SBP of  $\geq 140$  mmHg, DBP of  $\geq 90$  mmHg, and/or a reported medical history of  
26 anti-hypertensive medication.<sup>22</sup> The BMI was calculated as weight in kilograms  
27 divided by the square of the height in meters. Overweight was defined as BMI of 24–  
28 27.9 kg/m<sup>2</sup>, and obesity was defined as BMI of  $\geq 28$  kg/m<sup>2</sup>. The fasting blood samples  
29 were collected from the participants in the morning after an overnight fast and were

1  
2  
3  
4  
5  
6  
7  
8  
9  
10  
11  
12  
13  
14  
15  
16  
17  
18  
19  
20  
21  
22  
23  
24  
25  
26  
27  
28  
29  
30  
31  
32  
33  
34  
35  
36  
37  
38  
39  
40  
41  
42  
43  
44  
45  
46  
47  
48  
49  
50  
51  
52  
53  
54  
55  
56  
57  
58  
59  
60

used to assess fasting plasma glucose, total cholesterol, and TG levels.

According to Kahn’s theory,<sup>13</sup> LAP is calculated as [WC (cm) - The minimum of WC (male)] × [TG (mmol/L)] for males and [WC (cm) - The minimum of WC (female)] × [TG (mmol/L)] for females, and the minimum waist size theoretically contains only the abdomen, muscle, viscera, and vertebral bone.<sup>13</sup> Visceral fat can be estimated by the difference between the WC and the minimum waist size. In the present study, the WC of the studied population was skewed; therefore, the WC was log-transformed. The minimum WC was estimated by the mean WC minus two standard deviations after log-transformation in the local participants aged 18–24 years.<sup>13, 20</sup>

**Statistical analyses**

According to the hypertension status, the enrollees were divided into three groups (normotension, prehypertension, and hypertension). The frequency (%) was used to describe sex, marital status, education level, physical activity, BMI, smoker, and drinker. Mean ± standard deviation (SDs) was used to describe the WHR, fasting plasma glucose, total cholesterol, TG, SBP, DBP, and LAP. LAP was divided into four groups by the quartiles, i.e., Q1, Q2, Q3, and Q4. The differences of quantitative data across different hypertension statuses were analyzed by the Kruskal-Wallis H test because the data had skewed distribution. Categorical variables were analyzed by the Chi-squared test. The multivariate logistic regression model was used to analyze the relationship between LAP and risk factors of hypertension and prehypertension. The receiver operating characteristics (ROC) curves were applied to identify the superior obesity index and the best cut-off value of LAP to predict the hypertension risk. Moreover, the interaction effects between LAP and family history of hypertension were assessed by some relevant indicators, including the relative excess risk of interaction ( $RERI = OR_{11} - OR_{10} - OR_{01} + 1$ ), the attributable proportion due to interaction ( $AP = [OR_{11} - OR_{10} - OR_{01} + 1]/OR_{11}$ ), and the synergy index ( $SI = [OR_{11} - 1]/[OR_{01} - 1] + [OR_{10} - 1]$ ). If the interaction effect was not observed, the confidence interval of RERI and AP contained 0 and the confidence interval of S included 1.<sup>23</sup>

The above indicators were calculated using an Excel table designed by Andersson et al.<sup>23</sup> All reported *P*-values were two-tailed, and a *P*-value of  $< 0.05$  was considered significant. Statistical analyses were performed using SPSS version 19.0 (SPSS Inc., Chicago, IL, USA).

## RESULTS

### LAP

According to Kahn's theory,<sup>13</sup> LAP was calculated as  $(WC - 60.6) \times (TG \text{ [mmol/L]})$  in males and  $(WC - 54.1) \times (TG \text{ [mmol/L]})$  in females based on the actual data obtained from the Southern Chinese population (Table 1).<sup>20</sup>

### Basic characteristics of the study participants

A total of 2079 adults with an average age of 41.06 years were enrolled in the present study, including 1002 males (48.29%) and 1077 females (51.80%). The overall prevalence rates of normotension, prehypertension, and hypertension were 40.02%, 37.95%, and 22.03%, respectively. Male participants had a high prevalence of prehypertension and hypertension than female participants ( $P < 0.001$ ). Statistically significant differences in age ( $P < 0.001$ ), marital status ( $P < 0.001$ ), education level ( $P < 0.001$ ), smoker ( $P < 0.001$ ), drinker ( $P < 0.001$ ), and family history of hypertension ( $P = 0.005$ ) were observed between normotension, prehypertension, and hypertension groups. However, no significant differences were observed in physical activity ( $P = 0.611$ ) among the three groups. Anthropometric measurements found significant differences in BMI ( $P < 0.001$ ), WHR ( $P < 0.001$ ), LAP ( $P < 0.001$ ), fasting plasma glucose ( $P < 0.001$ ), total cholesterol ( $P < 0.001$ ), SBP ( $P < 0.001$ ), and DBP ( $P < 0.001$ ) between the groups (Table 2).

### LAP and the risk factors of hypertension

In order to investigate the relationship between LAP and blood pressure, LAP was divided into four groups by quartile (Table 3). A significant association was observed between LAP and blood pressure. SBP ( $P < 0.001$ ) and DBP ( $P < 0.001$ ) were relatively elevated in participants with higher LAP levels.

1  
2  
3  
4  
5  
6  
7  
8  
9  
10  
11  
12  
13  
14  
15  
16  
17  
18  
19  
20  
21  
22  
23  
24  
25  
26  
27  
28  
29  
30  
31  
32  
33  
34  
35  
36  
37  
38  
39  
40  
41  
42  
43  
44  
45  
46  
47  
48  
49  
50  
51  
52  
53  
54  
55  
56  
57  
58  
59  
60

1       Multinomial logistic regression analysis was conducted to evaluate the association  
2       between LAP quartiles and hypertension status (Table 4). Participants with the fourth  
3       quartile of LAP were more likely to develop prehypertension (crude OR = 6.23, 95%  
4       CI: 4.54–8.54) and hypertension (crude OR = 21.22, 95% CI: 14.02–32.09) than those  
5       with the first quartile. Moreover, after adjusting for age, sex, marital status,  
6       educational level, physical activity, smoker, drinker, BMI, and WHR, the risks of  
7       prehypertension (adjusted OR: 2.34, 95% CI: 1.58–3.48) and hypertension (adjusted  
8       OR: 3.52; 95% CI: 2.11–5.88) significantly increased in participants with the fourth  
9       quartile compared with those with the first quartile. After controlling for age, sex,  
10      marital status, educational level, physical activity, smoker, drinker, BMI, WHR,  
11      fasting plasma glucose, and family history of hypertension, increased risks of  
12      prehypertension (adjusted OR: 2.25, 95% CI: 1.51–3.35) and hypertension (adjusted  
13      OR: 3.19, 95%CI: 1.90–5.35) were observed in participants with the fourth LAP  
14      quartile compared with those with the first one.

15      The results of ROC curves analysis in males and females are shown in Figs. 1 and 2  
16      and Table. 5. LAP (AUC = 0.721; 95% CI: 0.680–0.761) was a better indicator to  
17      discriminate between different types of hypertension than BMI (AUC = 0.698; 95%  
18      CI: 0.658–0.737) or WHR (AUC = 0.684; 95% CI: 0.643–0.726) in females;  
19      however, BMI (AUC = 0.707, 95% CI: 0.672–0.742) performed better than WHR  
20      (AUC = 0.688; 95% CI: 0.650–0.725) and LAP (AUC = 0.677; 95% CI: 0.640–0.713)  
21      in males. The best cut-off values to predict hypertension were 63.892 in males and  
22      30.860 in females.

23      **Interaction effects between LAP and family history of hypertension**

24      The interaction effects between LAP and family history of hypertension are presented  
25      in Table 6. Significant interaction effects between LAP and family history of  
26      hypertension were observed in males. The results of RERI (1.652; 95% CI: 0.267–  
27      3.037) and AP (0.516; 95% CI: 0.238–0.794) indicated a significant interaction effect  
28      of family history of hypertension and LAP on hypertension, but the result of SI  
29      (3.998; 95% CI: 0.897–17.820) did not.

1 However, no significant interaction effects were found between LAP and family  
2 history of hypertension in females, as indicated by all the three indicators. RERI was  
3 - 0.673 (95% CI: -2.566–1.220); AP was -0.328 (95% CI: -1.451–0.795); and SI was  
4 0.610 (95% CI: 0.125–2.979).

## 5 Discussion

6 With the rapid development of the economy, elevated blood pressure has become a  
7 common and serious public health issue.<sup>24</sup> The prevalence of prehypertension and  
8 hypertension has significantly increased.<sup>25</sup> Elevated blood pressure is caused by  
9 diverse factors, among which obesity is closely related to hypertension.<sup>26</sup> Nowadays,  
10 the prevalence of obesity has increased by 13% in urban areas and by 85% in rural  
11 areas in China,<sup>16</sup> and more attention should thus be paid to this issue. An increase in  
12 body weight is typically followed by enhanced blood pressure.<sup>12</sup> Extensive studies  
13 have found that obesity, especially visceral adipose tissue, could strongly increase the  
14 blood pressure.<sup>26</sup>

15 The mechanisms underlying the interaction between obesity and hypertension are  
16 complicated. The mechanisms of obesity-induced hypertension include sodium  
17 retention, insulin resistance, activation of renin-angiotensin-aldosterone, altered  
18 vascular function, and secretion of relevant adipokines.<sup>27</sup> In addition, the mechanisms  
19 of blood pressure increase can be activated by visceral fat.<sup>28</sup>

20 Substantial evidences proved that the harm of the fat accumulation was greater than  
21 the total amount of fat.<sup>29, 30</sup> However, traditional obesity indexes, such as BMI, WC,  
22 and WHR, have some limitations when distinguishing between subcutaneous fat and  
23 visceral fat. Therefore, a new obesity index that can distinguish visceral fat easily and  
24 effectively is urgently needed. After Kahn first demonstrated that LAP performs  
25 better than BMI for recognizing the cardiovascular risk, domestic and foreign scholars  
26 have paid increasing attention to LAP. LAP, a combination of WC and TG, is an  
27 accessible and inexpensive way to assess visceral fat.<sup>13</sup> It is a well-known fact that TG  
28 can reflect the degree of visceral fat accumulation and WC is strongly associated with

1  
2  
3  
4  
5  
6  
7  
8  
9  
10  
11  
12  
13  
14  
15  
16  
17  
18  
19  
20  
21  
22  
23  
24  
25  
26  
27  
28  
29  
30  
31  
32  
33  
34  
35  
36  
37  
38  
39  
40  
41  
42  
43  
44  
45  
46  
47  
48  
49  
50  
51  
52  
53  
54  
55  
56  
57  
58  
59  
60

hypertension.<sup>12</sup> Notably, hypertriglyceridemic waist (HTGW) is also calculated based on the combination of TG and WC. However, LAP, a continuous indicator, is superior to reflect visceral fat than HTGW,<sup>31</sup> a dichotomous indicator.<sup>19</sup> Therefore, LAP was used as a visceral obesity indicator in this study.

LAP based on hypothesis of minimum waist circumference includes the rachis, abdominal viscera and muscle.<sup>13</sup> Therefore, the differences between the actual WC and the minimum WC can represent abdominal adipose tissue.<sup>13</sup> Notably, LAP in almost all studies is calculated by data obtained based on the third National Health and Nutrition Examination Survey in the United States.<sup>13</sup> Because of differences in race, dietary habits, or lifestyle, individuals from different countries should have different visceral adipose tissues. It has been demonstrated that there are considerable differences in visceral adipose tissues between Chinese individuals and Europeans or Americans.<sup>32</sup> Therefore, LAP was calculated in our study using a modified formula so that it could apply to the individuals dwelling in Southern China.

As expected, a significant association was found between LAP and hypertension in this present study. Our findings are consistent with those in studies by Zhong et al,<sup>16</sup> Song et al,<sup>30</sup> and Shen et al,<sup>20</sup> all of which have demonstrated that LAP is an effective and reliable diagnostic indicator of hypertension. Participants with significantly higher LAP had higher risks of prehypertension and hypertension than those with lower LAP. Multinomial logistic regression analysis revealed that after adjusting for other factors, the risks of prehypertension and hypertension in the group with the highest LAP level were 2.25 and 3.19 times higher, respectively, than those in the group with the lowest LAP.

In the present study, we also found that LAP was a better indicator than BMI and WHR for identifying the risk of hypertension in females, but BMI was slightly superior to LAP in males. Because women are more likely to accumulate adipose tissue around the hips and thighs, we can easily understand why LAP is superior to BMI in identifying the risk of hypertension in females.<sup>33</sup> Similar results have been obtained in the study by Wang et al..<sup>34</sup> However, Gao et al found that the performance

of LAP was superior to that of BMI in male Mongolians;<sup>21</sup> the findings may be due to the apparently lower prevalence of high TG in female Mongolians than in male Mongolians ( $P < 0.05$ ), and the facts might disturb the association between LAP and hypertension in female Mongolians.

In general, LAP, which applied to the Southern Chinese population, was a better indicator for predicting the hypertension risk in this study. In addition, large studies have demonstrated that family history of hypertension is a critical risk factor for hypertension, and individuals with family history of hypertension are 2–4 times more likely to develop hypertension than those without the family history of hypertension.<sup>35</sup> The interaction analysis in this study indicates the synergistic effect of LAP and family history on the hypertension risk in males, but not in females. In fact, cardiovascular events occur at a lower rate in females than in males.<sup>36</sup> In our study, the feminine participants who suffered both LAP and family history of hypertension were rarely observed and the prevalence rates of hypertension at a lower rate in females than in males.<sup>36</sup> Fewer positive observers in female might be due to sampling error, but might disturb the interaction effect between LAP and family history of hypertension on the hypertension risk in females. Visceral obesity and family history of hypertension may result in increased blood pressure through some unknown mechanisms. The synergistic effect between family history of hypertension and LAP on the hypertension risk was demonstrated in our study as well as in other studies.<sup>19, 34</sup> However, further studies are needed to investigate the interaction effect between LAP and family history of hypertension on the hypertension risk.

To date, LAP is an inexpensive screening tool to identify visceral adipose tissue, and the method has high reproducibility. LAP, which was proposed by Kahn, was developed for the Western population. Thus this study explored the validity of LAP, which was calculated based on the Southern China population. The findings suggest LAP might perform better in predicting the hypertension risk than BMI and WHR in Southern Chinese females.

This study has some limitations. First, because this is a cross-sectional study, the

1  
2  
3  
4  
5  
6  
7  
8  
9  
10  
11  
12  
13  
14  
15  
16  
17  
18  
19  
20  
21  
22  
23  
24  
25  
26  
27  
28  
29  
30  
31  
32  
33  
34  
35  
36  
37  
38  
39  
40  
41  
42  
43  
44  
45  
46  
47  
48  
49  
50  
51  
52  
53  
54  
55  
56  
57  
58  
59  
60

present results are not sufficient to indicate causality. Second, because of the small sample size in this study, further studies with a larger sample size are needed to investigate whether the modified LAP applies to all the residents dwelling in Southern China.

**CONCLUSION**

In conclusion, LAP can be used to distinguish visceral fat from subcutaneous fat in the Southern Chinese population. LAP was significantly associated with the hypertension risk, and higher LAP levels had relatively higher blood pressure. LAP performed better in predicting hypertension than did BMI and WHR in the Southern China female population. The synergistic effect of LAP and family history of hypertension was demonstrated in males, and further studies are needed to investigate the interactive effects between LAP and family history of hypertension in females.

**Acknowledgements**

We gratefully acknowledge Dr. Pei-Xi Wang, Dr. Jin-Xiang Ma, Xin-Yu Bao, Yi-Xian Xie, Xiao-Xia Zhang, Xin Peng, Yan Liu and Meng-Jiao Cheng for their excellent work in study coordination, data collection, and management.

**Contributors**

Jun-Xuan Huang, Pei-Xi Wang and Jin-Xiang Ma conceived and designed the study. Jun-Xuan Huang, Xin-Yu Bao, Yi-Xian Xie, Xiao-Xia Zhang, Xin Peng, Yan Liu and Meng-Jiao Cheng contributed to collection of the data, analyzed the data and interpretation of the results. Jun-Xuan Huang wrote the draft manuscript. Jin-Xiang Ma, Pei-Xi Wang and Jun-Xuan Huang finalized the manuscript. All of the authors approved the final version submitted for publication.

**Funding**

This study was supported by Talent Introduction Fund of Guangzhou Medical University (2009).

## 1 Competing interests

2 The authors declared that they had no conflict of interest.

## 3 Ethics statement

4 This study was approved by the Ethics Committee of Guangzhou Medical University.  
5 Written informed consent was obtained from each study participant before  
6 investigation.

## 7 Data sharing statement

8 Our data might not be shared directly, because data belongs to all the team members  
9 and informed consent should be attained from team members.

## 10 References

- 11 1. Bundy JD, He J. Hypertension and Related Cardiovascular Disease Burden in  
12 China. *Ann Glob Health* 2018;82(2):227-233. doi:10.1016/j.aogh.2016.02.002
- 13 2. Beaney T, Schutte AE, Tomaszewski M, et al. May Measurement Month 2017: an  
14 analysis of blood pressure screening results worldwide. *The Lancet Global*  
15 *Health* 2018;6(7):e736-e743. doi:10.1016/S2214-109X(18)30259-6
- 16 3. Kearney PM, Whelton M, Reynolds K, et al. Global burden of hypertension:  
17 analysis of worldwide data. *The Lancet* 2005;365(9455):217-223.  
18 doi:10.1016/S0140-6736(05)17741-1
- 19 4. Macia E, Gueye L, Duboz P. Hypertension and Obesity in Dakar, Senegal. *Plos*  
20 *One* 2016;11(9):e0161544. doi:10.1371/journal.pone.0161544
- 21 5. Tang L, Zhang F, Tong N. The association of visceral adipose tissue and  
22 subcutaneous adipose tissue with metabolic risk factors in a large population of  
23 Chinese adults. *Clin Endocrinol* 2016;85(1):46-53. doi:10.1111/cen.13013
- 24 6. Wandeler G, Paccaud F, Vollenweider P, et al. Strength of Family History in  
25 Predicting Levels of Blood Pressure, Plasma Glucose and Cholesterol. *Public*

- 1 *Health Genom* 2010;13(3):143-154. doi:10.1159/000233228
- 2
- 3
- 4
- 5
- 6
- 7 7. Liu M, He Y, Jiang B, et al. Association Between Family History and
- 8 Hypertension Among Chinese Elderly. *Medicine* 2015;94(48):e2226.
- 9 doi:10.1097/MD.0000000000002226
- 10
- 11
- 12
- 13 8. Al-Safi SA, Aboul-Enein FH, Aboul-Enein BH, et al. Influence of family history
- 14 and lifestyle on blood pressure and heart rate in young adults in Jordan. *Public*
- 15 *Health* 2006;120(11):1027-1032. doi:10.1016/j.puhe.2006.06.009
- 16
- 17
- 18
- 19
- 20 9. Alhawari HH, Al-Shelleh S, Alhawari HH, et al. Blood Pressure and Its
- 21 Association with Gender, Body Mass Index, Smoking, and Family History
- 22 among University Students. *Int J Hypertens* 2018;2018:1-5.
- 23 doi:10.1155/2018/4186496
- 24
- 25
- 26
- 27
- 28 10. Ibrahim MM. Subcutaneous and visceral adipose tissue: structural and functional
- 29 differences. *Obes Rev* 2010;11(1):11-18. doi:10.1111/j.1467-789X.2009.00623.x
- 30
- 31
- 32
- 33 11. Chen W, Wilson JL, Khaksari M, et al. Abdominal fat analyzed by DEXA scan
- 34 reflects visceral body fat and improves the phenotype description and the
- 35 assessment of metabolic risk in mice. *Am J Physiol-Endoc M*
- 36 2012;303(5):E635-E643. doi:10.1152/ajpendo.00078.2012
- 37
- 38
- 39
- 40
- 41
- 42 12. Nurdiantami Y, Watanabe K, Tanaka E, et al. Association of general and central
- 43 obesity with hypertension. *Clin Nutr* 2018;37(4):1259-1263.
- 44 doi:10.1016/j.clnu.2017.05.012
- 45
- 46
- 47
- 48
- 49 13. Kahn HS. The "lipid accumulation product" performs better than the body mass
- 50 index for recognizing cardiovascular risk: a population-based comparison. *Bmc*
- 51 *Cardiovasc Disor* 2005;5(1):26-26. doi:10.1186/1471-2261-5-26
- 52
- 53
- 54
- 55 14. Ray L, Ravichandran K, Nanda SK. Comparison of Lipid Accumulation Product
- 56 Index with Body Mass Index and Waist Circumference as a Predictor of
- 57 Metabolic Syndrome in Indian Population. *Metab Syndr Relat D*
- 58
- 59
- 60

- 2018;16(5):240-245. doi:10.1089/met.2017.0119
15. Lee JW, Lim NK, Park HY. The product of fasting plasma glucose and triglycerides improves risk prediction of type 2 diabetes in middle-aged Koreans. *Bmc Endocr Disord* 2018;18(1):33. doi:10.1186/s12902-018-0259-x
16. Zhong C, Xia W, Zhong X, et al. Lipid Accumulation Product and Hypertension Related to Stroke: a 9.2-Year Prospective Study Among Mongolians in China. *J Atheroscler Thromb* 2016;23(7):830-838. doi:10.5551/jat.33514
17. Wakabayashi I. Associations of Blood Lipid-Related Indices with Blood Pressure and Pulse Pressure in Middle-Aged Men. *Metab Syndr Relat D* 2015;13(1):22-28. doi:10.1089/met.2014.0093
18. de Oliveira CC, Roriz AKC, Ramos LB, et al. Indicators of Adiposity Predictors of Metabolic Syndrome in the Elderly. *Ann Nutr Metab* 2017;70(1):9-15. doi:10.1159/000455333
19. Song J, Chen X, Zhao Y, et al. Risk factors for prehypertension and their interactive effect: a cross-sectional survey in China. *Bmc Cardiovasc Disor* 2018;18(1). doi:10.1186/s12872-018-0917-y
20. Shen YY, Chen JC, Li G, et al. Relationship of lipid accumulation product with hypertension and diabetes among Beijing residents study. *Zhonghua yu fang yi xue za zhi [Chinese journal of preventive medicine]* 2017;51(5):415.
21. Gao X, Wang G, Wang A, et al. Comparison of lipid accumulation product with body mass index as an indicator of hypertension risk among Mongolians in China. *Obes Res Clin Pract* 2013;7(4):e308-e314. doi:10.1016/j.orcp.2012.02.002
22. Zhang M, Batu B, Tong W, et al. Prehypertension and Cardiovascular Risk Factor Clustering Among Mongolian Population in Rural and Animal Husbandry Area, Inner Mongolia, China. *Circ J* 2009;73(8):1437-1441.

1  
2  
3  
4  
5  
6  
7  
8  
9  
10  
11  
12  
13  
14  
15  
16  
17  
18  
19  
20  
21  
22  
23  
24  
25  
26  
27  
28  
29  
30  
31  
32  
33  
34  
35  
36  
37  
38  
39  
40  
41  
42  
43  
44  
45  
46  
47  
48  
49  
50  
51  
52  
53  
54  
55  
56  
57  
58  
59  
60

doi:10.1253/circj.CJ-09-0101

23. Andersson T, Alfredsson L, Källberg H, et al. Calculating measures of biological interaction. *Eur J Epidemiol* 2005;20(7):575-579. doi:10.1007/s10654-005-7835-x

24. Lackland DT, Beilin LJ, Campbell NRC, et al. Global Implications of Blood Pressure Thresholds and Targets. *Hypertension* 2018;71(6):985-987. doi:10.1161/HYPERTENSIONAHA.118.11280

25. Wang Z, Zeng X, Chen Z, et al. Association of visceral and total body fat with hypertension and prehypertension in a middle-aged Chinese population. *J Hypertens* 2015;33(8):1555-62. doi:10.1097/HJH.0000000000000602

26. Stabouli S, Papakatsika S, Kotsis V. The role of obesity, salt and exercise on blood pressure in children and adolescents. *Expert Rev Cardiovasc Ther* 2011;9(6):753-61. doi:10.1586/erc.11.63

27. Kotchen TA. Obesity-Related Hypertension: Epidemiology, Pathophysiology, and Clinical Management. *Am J Hypertens* 2010;23(11):1170-1178. doi:10.1038/ajh.2010.172

28. Boscaro M, Giacchetti G, Ronconi V. Visceral adipose tissue: emerging role of gluco- and mineralocorticoid hormones in the setting of cardiometabolic alterations: Adipose tissue and adrenal hormones. *Ann Ny Acad Sci* 2012;1264(1):87-102. doi:10.1111/j.1749-6632.2012.06597.x

29. Li Y, Bujo H, Takahashi K, et al. Visceral fat: higher responsiveness of fat mass and gene expression to calorie restriction than subcutaneous fat. *Exp Biol Med (Maywood)* 2003;228(10):1118-23.

30. Song J, Zhao Y, Nie S, et al. The effect of lipid accumulation product and its interaction with other factors on hypertension risk in Chinese Han population: A cross-sectional study. *Plos One* 2018;13(6):e0198105.

- doi:10.1371/journal.pone.0198105
31. Janghorbani M, Aminorroaya A, Amini M. Comparison of Different Obesity Indices for Predicting Incident Hypertension. *High Blood Pressure & Cardiovascular Prevention* 2017;24(2):157-166. doi:10.1007/s40292-017-0186-3
32. Nazare J, Smith JD, Borel A, et al. Ethnic influences on the relations between abdominal subcutaneous and visceral adiposity, liver fat, and cardiometabolic risk profile: the International Study of Prediction of Intra-Abdominal Adiposity and Its Relationship With Cardiometabolic Risk/Intra-Abdominal Adiposity. *The American Journal of Clinical Nutrition* 2012;96(4):714-726. doi:10.3945/ajcn.112.035758
33. MA B. Sex Differences in Body Composition. *Adv Exp Med Biol* 2017;1043:9-27. doi:10.1007/978-3-319-70178-3\_2
34. Wang H, Chen Y, Sun G, et al. Validity of cardiometabolic index, lipid accumulation product, and body adiposity index in predicting the risk of hypertension in Chinese population. *Postgraduate Medicine* 2018;130(3):325-333. doi:10.1080/00325481.2018.1444901
35. TOZAWA M, OSHIRO S, ISEKI C, et al. Family History of Hypertension and Blood Pressure in a Screened Cohort. *Hypertens Res* 2001;24(2):93-98. doi:10.1291/hypres.24.93
36. Doumas M, Papademetriou V, Faselis C, et al. Gender Differences in Hypertension: Myths and Reality. *Curr Hypertens Rep* 2013;15(4):321-330. doi:10.1007/s11906-013-0359-y

1  
2  
3  
4 1  
5  
6  
7 2  
8  
9  
10 3  
11  
12 4  
13  
14  
15 5  
16  
17  
18 6  
19  
20 7  
21  
22  
23 8  
24  
25  
26 9  
27  
28  
29 10  
30  
31 11  
32  
33 12  
34  
35  
36 13  
37  
38  
39 14  
40  
41  
42 15  
43  
44 16  
45  
46  
47 17  
48  
49 18  
50  
51 19  
52  
53  
54 20  
55  
56 21  
57  
58  
59 22  
60

**The titles and legends of figure**

**Title**

**Fig.1** The ROC curve of different obesity indexes in predicting hypertension in males.

**legend**

LAP: lipid accumulation product; BMI: body mass index; WHR: waist-hip ratio.

**Title**

**Fig.2** The ROC curve of different obesity indexes in predicting hypertension in females.

**legend**

LAP: lipid accumulation product; BMI: body mass index; WHR: waist-hip ratio.

**Table 1** The theoretically minimum waist size in the Southern Chinese population

| Sex    | Log-transformed waist (cm) | Theoretically minimum waist (cm) |
|--------|----------------------------|----------------------------------|
| Male   | 4.328 ± 0.112              | 60.6                             |
| Female | 4.255 ± 0.134              | 54.1                             |

2

**Table 2** Basic characteristics of the participants

| Variables                     | Normotension<br>(N = 832) | Prehypertension<br>(N = 789) | Hypertension<br>(N = 458) | $\chi^2 / Z$ | P-value |
|-------------------------------|---------------------------|------------------------------|---------------------------|--------------|---------|
| Sex (%)                       |                           |                              |                           | 135.625      | < 0.001 |
| Male                          | 32.57                     | 58.68                        | 58.52                     |              |         |
| Female                        | 67.43                     | 41.32                        | 41.48                     |              |         |
| Age (years)                   | 36.42 ± 10.59             | 41.38 ± 12.71                | 48.93 ± 12.75             | 267.206      | < 0.001 |
| Marital status (%)            |                           |                              |                           | 21.287       | < 0.001 |
| Currently not married         | 23.20                     | 18.76                        | 12.66                     |              |         |
| Currently married             | 76.80                     | 81.24                        | 87.34                     |              |         |
| Education level (%)           |                           |                              |                           | 101.355      | < 0.001 |
| Elementary school and lower   | 15.87                     | 21.55                        | 36.46                     |              |         |
| Secondary school              | 36.30                     | 38.53                        | 39.96                     |              |         |
| Senior high school and higher | 47.83                     | 39.92                        | 23.58                     |              |         |
| Physical activity (%)         |                           |                              |                           | 2.688        | 0.611   |
| Seldom or never               | 35.70                     | 34.22                        | 31.22                     |              |         |
| Moderate                      | 17.43                     | 18.25                        | 18.78                     |              |         |
| High                          | 46.87                     | 47.53                        | 50.00                     |              |         |

|    |                                    |               |               |                |          |         |
|----|------------------------------------|---------------|---------------|----------------|----------|---------|
| 1  |                                    |               |               |                |          |         |
| 2  |                                    |               |               |                |          |         |
| 3  |                                    |               |               |                |          |         |
| 4  | Smoker (%)                         |               |               |                | 50.346   | < 0.001 |
| 5  |                                    |               |               |                |          |         |
| 6  | Non-smoker                         | 82.25         | 71.61         | 67.90          |          |         |
| 7  |                                    |               |               |                |          |         |
| 8  |                                    |               |               |                |          |         |
| 9  | Smoker                             | 16.18         | 26.87         | 28.61          |          |         |
| 10 |                                    |               |               |                |          |         |
| 11 | Former smoker                      | 0.97          | 1.52          | 3.49           |          |         |
| 12 |                                    |               |               |                |          |         |
| 13 |                                    |               |               |                |          |         |
| 14 | Drinker (%)                        |               |               |                | 30.865   | < 0.001 |
| 15 |                                    |               |               |                |          |         |
| 16 | Non-drinker                        | 84.11         | 76.34         | 72.53          |          |         |
| 17 |                                    |               |               |                |          |         |
| 18 |                                    |               |               |                |          |         |
| 19 | Drinker                            | 14.91         | 22.39         | 24.62          |          |         |
| 20 |                                    |               |               |                |          |         |
| 21 | Former drinker                     | 0.98          | 1.27          | 2.85           |          |         |
| 22 |                                    |               |               |                |          |         |
| 23 |                                    |               |               |                |          |         |
| 24 | BMI                                |               |               |                | 255.012  | < 0.001 |
| 25 |                                    |               |               |                |          |         |
| 26 | < 18.5                             | 13.70         | 5.20          | 2.18           |          |         |
| 27 |                                    |               |               |                |          |         |
| 28 |                                    |               |               |                |          |         |
| 29 | 18.5–23.9                          | 68.51         | 54.88         | 41.70          |          |         |
| 30 |                                    |               |               |                |          |         |
| 31 | 24–27.9                            | 14.30         | 31.69         | 37.55          |          |         |
| 32 |                                    |               |               |                |          |         |
| 33 |                                    |               |               |                |          |         |
| 34 | ≥ 28                               | 3.49          | 8.24          | 18.56          |          |         |
| 35 |                                    |               |               |                |          |         |
| 36 | WHR                                |               |               |                | 248.475  | < 0.001 |
| 37 |                                    |               |               |                |          |         |
| 38 |                                    |               |               |                |          |         |
| 39 | Fasting plasma glucose (mmol/L)    | 4.69 ± 0.82   | 4.98 ± 1.33   | 5.31 ± 1.86    | 90.399   | < 0.001 |
| 40 |                                    |               |               |                |          |         |
| 41 | Total cholesterol (mmol/L)         | 4.70 ± 0.96   | 4.98 ± 1.07   | 5.26 ± 1.15    | 88.325   | < 0.001 |
| 42 |                                    |               |               |                |          |         |
| 43 |                                    |               |               |                |          |         |
| 44 | Triglyceride (mmol/L)              | 1.26 ± 0.83   | 1.77 ± 1.77   | 2.15 ± 2.25    | 178.995  | < 0.001 |
| 45 |                                    |               |               |                |          |         |
| 46 | Systolic blood pressure (mmHg)     | 107.97 ± 7.80 | 125.45 ± 6.65 | 144.78 ± 18.55 | 1533.137 | < 0.001 |
| 47 |                                    |               |               |                |          |         |
| 48 |                                    |               |               |                |          |         |
| 49 | Diastolic blood pressure (mmHg)    | 69.49 ± 6.40  | 79.59 ± 5.99  | 91.49 ± 11.33  | 1206.505 | < 0.001 |
| 50 |                                    |               |               |                |          |         |
| 51 | Family history of hypertension (%) |               |               |                | 18.391   | 0.005   |
| 52 |                                    |               |               |                |          |         |
| 53 |                                    |               |               |                |          |         |
| 54 | Only father                        | 11.42         | 11.03         | 11.14          |          |         |
| 55 |                                    |               |               |                |          |         |
| 56 | Only mother                        | 12.02         | 15.08         | 17.25          |          |         |
| 57 |                                    |               |               |                |          |         |
| 58 |                                    |               |               |                |          |         |
| 59 | Both parents                       | 5.41          | 4.82          | 8.95           |          |         |
| 60 |                                    |               |               |                |          |         |

|         |               |               |               |         |         |
|---------|---------------|---------------|---------------|---------|---------|
| Neither | 71.15         | 69.07         | 62.66         |         |         |
| LAP     | 29.14 ± 27.00 | 52.15 ± 63.50 | 75.87 ± 99.81 | 355.133 | < 0.001 |

1 BMI: body mass index; WHR: waist-hip rate; LAP: lipid accumulation product.

2

3 **Table 3** Comparison of blood pressure among four quartiles of LAP

| Variables                       | LAP            |                |                |                | Z       | P-value |
|---------------------------------|----------------|----------------|----------------|----------------|---------|---------|
|                                 | Q1             | Q2             | Q3             | Q4             |         |         |
|                                 | (< 17.36)      | (17.36–31.31)  | (31.31–57.46)  | (> 57.46)      |         |         |
| Systolic blood pressure (mmHg)  | 112.47 ± 13.63 | 119.74 ± 15.12 | 125.85 ± 15.96 | 132.71 ± 19.09 | 405.625 | < 0.001 |
| Diastolic blood pressure (mmHg) | 71.93 ± 9.31   | 76.66 ± 10.50  | 79.68 ± 10.04  | 84.37 ± 11.59  | 354.672 | < 0.001 |

4

5 **Table 4** Multinomial logistic regression analysis of LAP associated with hypertension status

| OR <sup>a</sup> (95% CI)     |                         | OR <sup>b</sup> (95% CI)   |                         | OR <sup>c</sup> (95% CI) |                         |
|------------------------------|-------------------------|----------------------------|-------------------------|--------------------------|-------------------------|
| Quartiles of prehypertension | hypertension            | prehypertension            | hypertension            | prehypertension          | hypertension            |
| LAP                          |                         |                            |                         |                          |                         |
| Q1<br>(< 17.36)              | 1 (reference)           | 1 (reference)              | 1 (reference)           | 1 (reference)            | 1 (reference)           |
| Q2<br>(17.36–31.31)          | 2.83***<br>(1.73, 3.01) | 3.10***<br>(2.04, 4.72)    | 1.64**<br>(1.19, 2.17)  | 1.51<br>(0.95, 2.40)     | 1.61**<br>(1.19, 2.18)  |
| Q3<br>(31.31–57.46)          | 4.41***<br>(3.32, 5.87) | 7.85***<br>(5.22, 11.82)   | 2.20***<br>(1.67, 3.08) | 2.00**<br>(1.23, 3.23)   | 2.18***<br>(1.56, 3.07) |
| Q4<br>(> 57.46)              | 6.23***<br>(4.54, 8.54) | 21.22***<br>(14.02, 32.09) | 2.34***<br>(1.58, 3.48) | 3.52***<br>(2.11, 5.88)  | 2.25***<br>(1.51, 3.35) |

1 OR=Odds ratio; CI=confidence interval; \*\*\*,  $P < 0.001$ ; \*\*,  $P < 0.01$ ; \*,  $P < 0.05$ .  
2 <sup>a</sup>, unadjusted.  
3 <sup>b</sup>, adjusted for age, sex, marital status, educational level, physical activity, smoker, drinker, BMI,  
4 and WHR.  
5 <sup>c</sup>, adjusted for fasting plasma glucose, family history of hypertension, and all the factors in b.

7 **Table 5** Predicting hypertension by different obesity indexes

| Variables     | Cut-off value | Sensitivity (%) | Specificity (%) | Youden Index | AUC(95% CI)          | P-value |
|---------------|---------------|-----------------|-----------------|--------------|----------------------|---------|
| <b>Male</b>   |               |                 |                 |              |                      |         |
| BMI           | 23.004        | 0.735           | 0.581           | 0.316        | 0.707 (0.672, 0.742) | < 0.001 |
| WHR           | 0.906         | 0.586           | 0.703           | 0.289        | 0.688 (0.650, 0.725) | < 0.001 |
| LAP           | 63.892        | 0.496           | 0.770           | 0.266        | 0.677 (0.640, 0.713) | < 0.001 |
| <b>Female</b> |               |                 |                 |              |                      |         |
| BMI           | 21.767        | 0.816           | 0.507           | 0.323        | 0.698 (0.658, 0.737) | < 0.001 |
| WHR           | 0.860         | 0.742           | 0.552           | 0.294        | 0.684 (0.643, 0.726) | < 0.001 |
| LAP           | 30.860        | 0.689           | 0.674           | 0.363        | 0.721 (0.680, 0.761) | < 0.001 |

8 BMI: body mass index; WHR: waist-hip rate; LAP: lipid accumulation product; AUC: area under  
9 curve; OR=Odds ratio; CI=confidence interval.

11 **Table 6** Interaction effects between LAP and family history of hypertension

| Variables        | Variables                   | N   | OR <sup>c</sup> (95% CI) | Interaction indexes (95% CI) |
|------------------|-----------------------------|-----|--------------------------|------------------------------|
| <b>Male</b>      |                             |     |                          |                              |
| LAP <sup>a</sup> | Family history <sup>b</sup> |     |                          |                              |
| -                | -                           | 486 | 1 (reference)            | RERI = 1.652 (0.267, 3.037)* |

|                  |                             |     |                         |                               |
|------------------|-----------------------------|-----|-------------------------|-------------------------------|
| -                | +                           | 215 | 1.189 (0.772, 1.832)    | AP = 0.516 (0.238, 0.794)*    |
| +                | -                           | 173 | 1.362 (0.875, 2.121)    | SI = 3.998 (0.897, 17.820)    |
| +                | +                           | 128 | 3.203*** (2.002, 5.124) |                               |
| <b>Female</b>    |                             |     |                         |                               |
| LAP <sup>a</sup> | Family history <sup>b</sup> |     |                         |                               |
| -                | -                           | 657 | 1 (reference)           | RERI = -0.673 (-2.566, 1.220) |
| -                | +                           | 276 | 1.995** (1.284, 3.099)  | AP = -0.328 (-1.451, 0.795)   |
| +                | -                           | 108 | 1.729* (1.023, 2.922)   | SI = 0.610 (0.125, 2.979)     |
| +                | +                           | 36  | 2.051 (0.919, 4.589)    |                               |

1 LAP: lipid accumulation production; RERI: relative excess risk of interaction ; AP:  
2 attributable proportion due to interaction; SI: synergy index; OR=Odds ratio;  
3 CI=confidence interval; \*\*\*,  $P < 0.001$ ; \*\*,  $P < 0.01$ ; \*,  $P < 0.05$ .

4 <sup>a</sup>, grouped by the cut-off values in Table 5.

5 <sup>b</sup>, family history of hypertension was defined as one parent or both parents having hypertension.

6 <sup>c</sup>, adjusted for age, marital status, educational level, physical activity, smoker, drinker, BMI,  
7 and WHR.

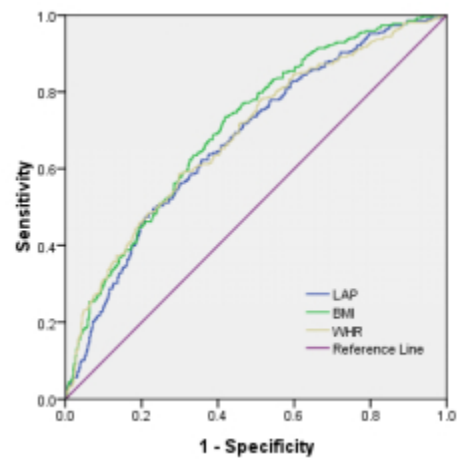

Fig.1 The ROC curve of different obesity indexes in predicting hypertension in males.  
LAP: lipid accumulation product; BMI: body mass index; WHR: waist-hip ratio.

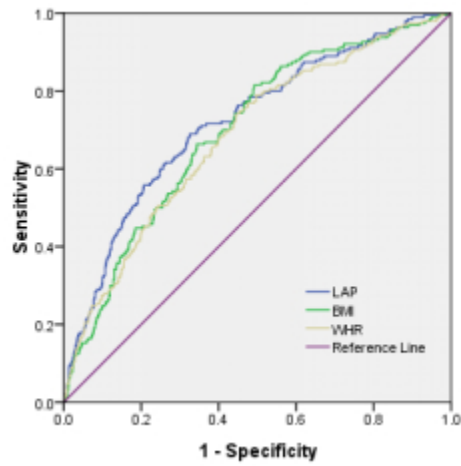

Fig.2 The ROC curve of different obesity indexes in predicting hypertension in females.  
LAP: lipid accumulation product; BMI: body mass index; WHR: waist-hip ratio.

STROBE 2007 (v4) Statement—Checklist of items that should be included in reports of *cross-sectional studies*

| Section/Topic             | Item # | Recommendation                                                                                                                                                                       | Reported on page # |
|---------------------------|--------|--------------------------------------------------------------------------------------------------------------------------------------------------------------------------------------|--------------------|
| Title and abstract        | 1      | (a) Indicate the study’s design with a commonly used term in the title or the abstract                                                                                               | Page 1             |
|                           |        | (b) Provide in the abstract an informative and balanced summary of what was done and what was found                                                                                  | Page 2             |
| Introduction              |        |                                                                                                                                                                                      |                    |
| Background/rationale      | 2      | Explain the scientific background and rationale for the investigation being reported                                                                                                 | Page 4-5           |
| Objectives                | 3      | State specific objectives, including any prespecified hypotheses                                                                                                                     | Page 5             |
| Methods                   |        |                                                                                                                                                                                      |                    |
| Study design              | 4      | Present key elements of study design early in the paper                                                                                                                              | Page 5             |
| Setting                   | 5      | Describe the setting, locations, and relevant dates, including periods of recruitment, exposure, follow-up, and data collection                                                      | Page 5             |
| Participants              | 6      | (a) Give the eligibility criteria, and the sources and methods of selection of participants                                                                                          | Page 5             |
| Variables                 | 7      | Clearly define all outcomes, exposures, predictors, potential confounders, and effect modifiers. Give diagnostic criteria, if applicable                                             | Page 6-7           |
| Data sources/ measurement | 8*     | For each variable of interest, give sources of data and details of methods of assessment (measurement). Describe comparability of assessment methods if there is more than one group | Page 6-7           |
| Bias                      | 9      | Describe any efforts to address potential sources of bias                                                                                                                            | Page 6             |

|                        |     |                                                                                                                                                                                                              |                             |
|------------------------|-----|--------------------------------------------------------------------------------------------------------------------------------------------------------------------------------------------------------------|-----------------------------|
| Study size             | 10  | Explain how the study size was arrived at                                                                                                                                                                    | Page 5                      |
| Quantitative variables | 11  | Explain how quantitative variables were handled in the analyses. If applicable, describe which groupings were chosen and why                                                                                 | Page 7-8                    |
| Statistical methods    | 12  | (a) Describe all statistical methods, including those used to control for confounding                                                                                                                        | Page 7-8                    |
|                        |     | (b) Describe any methods used to examine subgroups and interactions                                                                                                                                          | Page 7-8                    |
|                        |     | (c) Explain how missing data were addressed                                                                                                                                                                  | Page 5                      |
|                        |     | (d) If applicable, describe analytical methods taking account of sampling strategy                                                                                                                           | Page 5                      |
|                        |     | (e) Describe any sensitivity analyses                                                                                                                                                                        | Not applicable              |
| <b>Results</b>         |     |                                                                                                                                                                                                              |                             |
| Participants           | 13* | (a) Report numbers of individuals at each stage of study—eg numbers potentially eligible, examined for eligibility, confirmed eligible, included in the study, completing follow-up, and analysed            | Page 8; Table 2             |
|                        |     | (b) Give reasons for non-participation at each stage                                                                                                                                                         | Not application             |
|                        |     | (c) Consider use of a flow diagram                                                                                                                                                                           | Not application             |
| Descriptive data       | 14* | (a) Give characteristics of study participants (eg demographic, clinical, social) and information on exposures and potential confounders                                                                     | Page 8; Table 2             |
|                        |     | (b) Indicate number of participants with missing data for each variable of interest                                                                                                                          | Not application             |
| Outcome data           | 15* | Report numbers of outcome events or summary measures                                                                                                                                                         | Page 8; Table 2             |
| Main results           | 16  | (a) Give unadjusted estimates and, if applicable, confounder-adjusted estimates and their precision (eg, 95% confidence interval). Make clear which confounders were adjusted for and why they were included | Page 9-10; Table 4; Table 6 |
|                        |     | (b) Report category boundaries when continuous variables were categorized                                                                                                                                    | Page 6-8; Table 2;          |

|                          |    |                                                                                                                                                                            |                    |
|--------------------------|----|----------------------------------------------------------------------------------------------------------------------------------------------------------------------------|--------------------|
|                          |    |                                                                                                                                                                            | Table 3 ; Table 6  |
|                          |    | (c) If relevant, consider translating estimates of relative risk into absolute risk for a meaningful time period                                                           | Not application    |
| Other analyses           | 17 | Report other analyses done—eg analyses of subgroups and interactions, and sensitivity analyses                                                                             | Page 9-10; Table 6 |
| <b>Discussion</b>        |    |                                                                                                                                                                            |                    |
| Key results              | 18 | Summarise key results with reference to study objectives                                                                                                                   | Page 11-12         |
| Limitations              | 19 | Discuss limitations of the study, taking into account sources of potential bias or imprecision. Discuss both direction and magnitude of any potential bias                 | Page 12-13         |
| Interpretation           | 20 | Give a cautious overall interpretation of results considering objectives, limitations, multiplicity of analyses, results from similar studies, and other relevant evidence | Page 10-13         |
| Generalisability         | 21 | Discuss the generalisability (external validity) of the study results                                                                                                      | Page 12-13         |
| <b>Other information</b> |    |                                                                                                                                                                            |                    |
| Funding                  | 22 | Give the source of funding and the role of the funders for the present study and, if applicable, for the original study on which the present article is based              | Page 13            |

\*Give information separately for cases and controls in case-control studies and, if applicable, for exposed and unexposed groups in cohort and cross-sectional studies.

**Note:** An Explanation and Elaboration article discusses each checklist item and gives methodological background and published examples of transparent reporting. The STROBE checklist is best used in conjunction with this article (freely available on the Web sites of PLoS Medicine at <http://www.plosmedicine.org/>, Annals of Internal Medicine at <http://www.annals.org/>, and Epidemiology at <http://www.epidem.com/>). Information on the STROBE Initiative is available at [www.strobe-statement.org](http://www.strobe-statement.org).

# BMJ Open

## Interaction of lipid accumulation product and family history of hypertension on hypertension risk: A cross-sectional study in the Southern Chinese population

|                                 |                                                                                                                                                                                                                                                                                                                                                                                                                                                                 |
|---------------------------------|-----------------------------------------------------------------------------------------------------------------------------------------------------------------------------------------------------------------------------------------------------------------------------------------------------------------------------------------------------------------------------------------------------------------------------------------------------------------|
| Journal:                        | <i>BMJ Open</i>                                                                                                                                                                                                                                                                                                                                                                                                                                                 |
| Manuscript ID                   | bmjopen-2019-029253.R1                                                                                                                                                                                                                                                                                                                                                                                                                                          |
| Article Type:                   | Original research                                                                                                                                                                                                                                                                                                                                                                                                                                               |
| Date Submitted by the Author:   | 26-Aug-2019                                                                                                                                                                                                                                                                                                                                                                                                                                                     |
| Complete List of Authors:       | Huang, junxuan; Guangzhou Medical University<br>Bao, XinYu; Guangzhou Medical University<br>Xie, yixian; Guangzhou Medical University<br>Zhang, xiaoxia; Guangzhou Medical University<br>Peng, xin; Guangzhou Medical University<br>Liu, yan; Guangzhou Medical University<br>Cheng, mengjiao; Guangzhou Medical University<br>Ma, JinXiang; Guangzhou Medical University<br>wang, peixi; General Practice Center, Nanhai Hospital, Southern Medical University |
| <b>Primary Subject Heading</b>: | Public health                                                                                                                                                                                                                                                                                                                                                                                                                                                   |
| Secondary Subject Heading:      | Epidemiology, Diabetes and endocrinology                                                                                                                                                                                                                                                                                                                                                                                                                        |
| Keywords:                       | Hypertension < CARDIOLOGY, LAP, Family history, Interaction effect                                                                                                                                                                                                                                                                                                                                                                                              |
|                                 |                                                                                                                                                                                                                                                                                                                                                                                                                                                                 |

SCHOLARONE™  
Manuscripts

mjx777108@hotmail.com, peixi001@163.com

## ABSTRACT

**Objectives:** This study aimed to investigate the applicability of a novel index based on WC and TG, named lipid accumulation product (LAP) in the Southern Chinese population, and compare the predictive effects of LAP and other obesity indicators on hypertension risk. Moreover, this study investigated the interactive effects of LAP and family history of hypertension.

**Methods:** A total of 2079 community-dwelling adults in Southern China were enrolled in this cross-sectional study. The participants underwent the questionnaire survey, anthropometric tests, and laboratory examinations. The multivariate logistic regression model and receiver operating characteristic (ROC) curves were used to assess the association between hypertension risk and obesity indexes, including LAP, body mass index (BMI), waist-hip ratio (WHR), waist circumference (WC), Triglyceride (TG). The interaction effects were evaluated by relative excess risk of interaction (RERI), attributable proportion due to interaction (AP), and synergy index (SI).

**Results:** Higher LAP levels had relatively higher risk of hypertension in both sex (males: adjusted odds ratio [OR] = 2.79 per SD increase, 95% confidence interval [CI] = 1.43-5.44,  $P < 0.001$ ; females: adjusted OR:3.15, 95%CI=1.56-6.39,  $P < 0.001$ ). LAP (area under curve [AUC] = 0.721; 95% CI: 0.680–0.761) was a better indicator in identifying hypertension risk than BMI, WHR and TG in females, but WC performed better in males. A significant interaction between LAP and family history of hypertension was observed in males (RERI = 1.652, 95% CI: 0.267–3.037; AP = 0.516, 95% CI: 0.238–0.794; SI = 3.998, 95% CI: 0.897–17.820), but no statistically significant differences in females.

**Conclusions:** LAP was significantly associated with the hypertension risk in the Southern Chinese population, and LAP performed better on hypertension risk than did BMI, WHR and TG in the Southern China females population. The synergistic effect of LAP and family history of hypertension was demonstrated.

1  
2  
3  
4  
5  
6  
7  
8  
9  
10  
11  
12  
13  
14  
15  
16  
17  
18  
19  
20  
21  
22  
23  
24  
25  
26  
27  
28  
29  
30  
31  
32  
33  
34  
35  
36  
37  
38  
39  
40  
41  
42  
43  
44  
45  
46  
47  
48  
49  
50  
51  
52  
53  
54  
55  
56  
57  
58  
59  
60

1    **Keywords: Hypertension, LAP, Family history, Interaction effect**

2    **Strengths and limitations of this study**

3    **Strengths:**

4    1. Our study is the first to examine the validity of LAP, which was calculated using a  
5    modified formula, in the Southern China population.

6    **Limitations:**

- 7    1. This is a cross-sectional study, the results are not sufficient to indicate causality.
- 8    2. The population of our study can partially represent the general population in the  
9    Southern China, but cannot fully represent this region.
- 10    3. Lack of the adjustment for renal function, and other risk factors for hypertension  
11    (such as serum uric acid) in our study.
- 12    4. This study has small sample size, so further studies with a larger sample size are  
13    needed to investigate whether the modified LAP applies to all the residents dwelling  
14    in Southern China.

## INTRODUCTION

Hypertension, a significant risk factor of cardiovascular disease,<sup>1</sup> is one of the most prevalent public health problems in the world, and it is the leading contributor to the global burden of disease and mortality. Nowadays, the number of adults with hypertension in the world is being predicted to increase by about 60% to a total of 1.56 billion in 2025, and one-third of adults are suffering from hypertension in China.<sup>2,3</sup>

Accumulating evidence proves that obesity, especially visceral fat, and family history of hypertension could significantly contribute to hypertension.<sup>4-6</sup> Numerous studies have demonstrated that positive family history is an important risk factor for hypertension.<sup>6-9</sup> When it comes to obesity, the indexes that are most frequently used to assess obesity are body mass index (BMI), waist circumference (WC), and waist-hip ratio (WHR); however, these traditional obesity indexes can merely reflect the degrees of overweight and abdominal obesity but cannot distinguish between subcutaneous fat and visceral fat.<sup>10</sup> Micromagnetic resonance imaging and microcomputed tomography, the gold standard measurement methods of visceral fat, are not only inconvenient but also expensive;<sup>11</sup> moreover, they are not suitable for large-scale epidemiological investigations. Therefore, it is necessary for us to identify a new obesity indicator that can predict visceral fat from subcutaneous fat conveniently and economically.

Recently, increasing attention has been directed towards lipid accumulation product (LAP). LAP, a new obesity index computed from WC and triglyceride (TG), has been shown to be a useful indicator of visceral fat,<sup>12</sup> as demonstrated by Kahn in 2005<sup>13</sup>. Some studies suggest that LAP can also be used to identify metabolic syndromes,<sup>14,15</sup> type 2 diabetes mellitus,<sup>16</sup> stroke<sup>17</sup> and arterial stiffness.<sup>18</sup> Additionally, several cross-sectional studies conducted in Japan,<sup>19</sup> India,<sup>14</sup> and Brazil indicate that LAP is significantly associated with cardiovascular disease and is a better indicator than BMI for identifying the cardiovascular risk.<sup>13, 20</sup> A few national studies have investigated the association between LAP and hypertension in China, and all of them were

1  
2  
3  
4  
5  
6  
7  
8  
9  
10  
11  
12  
13  
14  
15  
16  
17  
18  
19  
20  
21  
22  
23  
24  
25  
26  
27  
28  
29  
30  
31  
32  
33  
34  
35  
36  
37  
38  
39  
40  
41  
42  
43  
44  
45  
46  
47  
48  
49  
50  
51  
52  
53  
54  
55  
56  
57  
58  
59  
60

conducted in northern China, including Bengbu,<sup>21</sup> Beijing,<sup>22</sup> and Inner Mongolia.<sup>23</sup> With a vast territory, China has tremendous difference between South and North. Due to the geographical environment and dietary habits that have formed throughout its long history, there are some dietary and cultural differences between Northern and Southern China.<sup>24</sup> The Northern region shows a high intake of wheat, tubers and liquor,etc. While southerner has a high intake of rice, vegetables, meat, poultry, fish etc.<sup>24</sup> The Carbohydrate-rich pattern of the northern region is associated with a high risk of hypertriglyceridemia and higher BMI. Meanwile, significant differences are found in SBP/DBP between southern Chinese and northern Chinese owing to different climate and dietary habit between southern and northern.<sup>25</sup> Studies have found that the northerners were heavier and had higher triglycerides level than southerners.<sup>26,27</sup> Differences in dietary habits, or lifestyle, individuals from different regions should lead to different LAP. LAP has a different situation in the north and south. Thus, the applicability of LAP in predicting hypertension in Southern China is worth studying. However, rare studies have compared LAP with other obesity indexes in the Southern Chinese population. In addition, almost all studies about LAP used the formula that was developed based on the third National Health and Nutrition Examination Survey in the US. Therefore, it is reasonable to suggest that the calculation formula of LAP needs to be modified in the Chinese population.

To the best of our knowledge, no studies have attempted to adjust the calculation formula of LAP so that it can apply to the Southern Chinese population, and rare studies have explored additive interactions between family history of hypertension and LAP. Thus, the primary purpose of this study was to investigate the applicability of LAP in the Southern Chinese population and compare the predictive effects of LAP and other obesity indicators on hypertension risk. And the secondary purpose of the study was to assess interactive effects between LAP and family history of hypertension to predict the hypertension risk in the Southern Chinese population.

**METHODS**

**Study design and subjects**

1 A cross-sectional survey based on community health was conducted in the FoShan  
2 city of Guangdong province in the Southern China. Recruiting the enrollers took  
3 place in March 2017. The study samples were selected by a multistage and stratified  
4 random sampling method. The stratification according to the economic level and  
5 randomly selected street communities at economic levels, then randomly selected  
6 communities in street communities according to proportion. Communities residents  
7 were then randomly selected from the household lists. A total of 3760 individuals  
8 were enrolled in this study; among them, 1681 participants who lacked complete data  
9 on demographic characteristics, anthropometric tests, or laboratory examinations were  
10 excluded. Finally, 2079 adults who had complete data were included in the analysis.

### 11 **Patient and public involvement**

12 Patients or public were not involved in this study.

### 13 **Ethics statement**

14 This study was approved by the Ethics Committee of Guangzhou Medical University.  
15 Written informed consent was obtained from each study participant before  
16 investigation.

### 17 **General study questionnaire**

18 An interview-based survey was performed using a questionnaire by trained staff.  
19 Socio-demographic data, family history of hypertension, cigarette smoking, and  
20 alcohol drinking were investigated. Smokers were defined as the participants smoking  
21 at least 1 cigarette/day for at least 6 months. Drinkers were defined as individuals  
22 consuming at least 30 ml alcohol/week for 1 year or more. Physical activities were  
23 divided into “insufficiently active” and “sufficiently active.” Participants with  
24 “insufficiently active” were defined as those who performed activity less than  
25 150min/week. Participants with “sufficiently active” were defined as those who  
26 exercised more than 150min/week.<sup>28</sup> Marital status was classified as “currently not  
27 married” and “currently married”; “married” was regarded as “currently married,” and  
28 “divorced/widowed/single” was regarded as “currently not married.” Educational

level was categorized as “elementary school or lower,” “secondary school,” and “senior high school or higher.”

**Anthropometric tests and laboratory examinations**

The participants were required to take off their shoes and wear lightweight clothing for weight and height measurements. WC was measured at the level of 1 cm above the navel.<sup>29</sup> Automatic sphygmomanometer (OMRON, hem-7125) was used to measure blood pressure (BP) of participants. BP measurement was conducted thrice in a quiet environment, and the participants rested at least one minute between each time of measurement. The mean of the three measurements was used in the analysis. Prehypertension was defined as systolic blood pressure (SBP) of 120–139 mmHg and/or diastolic blood pressure (DBP) of 80–89 mmHg, and hypertension was defined as SBP of  $\geq 140$  mmHg, DBP of  $\geq 90$  mmHg, and/or a reported medical history of anti-hypertensive medication.<sup>29</sup> The BMI was calculated as weight in kilograms divided by the square of the height in meters. Overweight was defined as BMI of 24–27.9 kg/m<sup>2</sup>, and obesity was defined as BMI of  $\geq 28$  kg/m<sup>2</sup>. The fasting blood samples were collected from the participants in the morning after an overnight fast and were used to assess fasting plasma glucose, total cholesterol, and TG levels.

According to Kahn’s theory,<sup>13</sup> LAP is calculated as [WC (cm) - The minimum of WC (male)]  $\times$  [TG (mmol/L)] for males and [WC (cm) - The minimum of WC (female)]  $\times$  [TG (mmol/L)] for females, and the minimum waist size theoretically contains only the abdomen, muscle, viscera, and vertebral bone.<sup>13</sup> Visceral fat can be estimated by the difference between the WC and the minimum waist size. In the present study, the WC of the studied population was skewed; therefore, the WC was log-transformed. The minimum WC was estimated by the mean WC minus two standard deviations after log-transformation in the local participants aged 18–24 years.<sup>13, 22</sup>

**Statistical analyses**

According to the hypertension status, the enrollees were divided into three groups

(normotension, prehypertension, and hypertension). The frequency (%) was used to describe sex, marital status, education level, physical activity, BMI, smoker, and drinker. Mean  $\pm$  standard deviation (SDs) was used to describe the WC, WHR, fasting plasma glucose, total cholesterol, TG, SBP, DBP, and LAP. LAP was divided into four groups by the quartiles, i.e., Q1, Q2, Q3, and Q4. The differences of quantitative data across different hypertension statuses were analyzed by the Kruskal-Wallis H test because the data had skewed distribution. Categorical variables were analyzed by the Chi-squared test. The multivariate logistic regression model was used to analyze the relationship between LAP and risk factors of hypertension and prehypertension. The receiver operating characteristics (ROC) curves were applied to identify the superior obesity index and the best cut-off value of LAP to predict the hypertension risk. Moreover, the interaction effects between LAP and family history of hypertension were assessed by some relevant indicators, including the relative excess risk of interaction ( $RERI = OR_{11} - OR_{10} - OR_{01} + 1$ ), the attributable proportion due to interaction ( $AP = [OR_{11} - OR_{10} - OR_{01} + 1]/OR_{11}$ ), and the synergy index ( $SI = [OR_{11} - 1]/[OR_{01} - 1] + [OR_{10} - 1]$ ). If the interaction effect was not observed, the confidence interval of RERI and AP contained 0 and the confidence interval of S included 1.<sup>30</sup> The above indicators were calculated using an Excel table designed by Andersson et al.<sup>30</sup> All reported *P*-values were two-tailed, and a *P*-value of  $< 0.05$  was considered significant. Statistical analyses were performed using SPSS version 19.0 (SPSS Inc., Chicago, IL, USA).

## RESULTS

### LAP

According to Kahn's theory,<sup>13</sup> LAP was calculated as  $(WC - 60.6) \times (TG \text{ [mmol/L]})$  in males and  $(WC - 54.1) \times (TG \text{ [mmol/L]})$  in females based on the actual data obtained from the Southern Chinese population.<sup>22</sup>

### Basic characteristics of the study participants

A total of 2079 adults with an average age of 41.06 years were enrolled in the present

1  
2  
3  
4  
5  
6  
7  
8  
9  
10  
11  
12  
13  
14  
15  
16  
17  
18  
19  
20  
21  
22  
23  
24  
25  
26  
27  
28  
29  
30  
31  
32  
33  
34  
35  
36  
37  
38  
39  
40  
41  
42  
43  
44  
45  
46  
47  
48  
49  
50  
51  
52  
53  
54  
55  
56  
57  
58  
59  
60

study, including 1002 males (48.29%) and 1077 females (51.80%). The overall prevalence rates of normotension, prehypertension, and hypertension were 40.02%, 37.95%, and 22.03%, respectively. Male participants had a high prevalence of prehypertension and hypertension than female participants ( $P < 0.001$ ). Statistically significant differences in age ( $P < 0.001$ ), marital status ( $P < 0.001$ ), education level ( $P < 0.001$ ), smoker ( $P < 0.001$ ), drinker ( $P < 0.001$ ), and family history of hypertension ( $P = 0.005$ ) were observed between normotension, prehypertension, and hypertension groups. However, no significant differences were observed in physical activity ( $P = 0.550$ ) among the three groups. Anthropometric measurements found significant differences in BMI ( $P < 0.001$ ), WC ( $P < 0.001$ ), WHR ( $P < 0.001$ ), LAP ( $P < 0.001$ ) between the groups. And significant differences found in laboratory examinations including fasting plasma glucose ( $P < 0.001$ ), total cholesterol ( $P < 0.001$ ), SBP ( $P < 0.001$ ), and DBP ( $P < 0.001$ ) between the groups (Table 1).

**LAP and the risk factors of hypertension**

In order to investigate the relationship between LAP and blood pressure, LAP was divided into four groups by quartile in different sex (Table 2). A significant association was observed between LAP and blood pressure in both male and female. The results in male and female were shown that SBP ( $P < 0.001$ ) and DBP ( $P < 0.001$ ) were relatively elevated in participants with higher LAP levels.

Multinomial logistic regression analysis was conducted to evaluate the association between LAP quartiles and hypertension status (Table 3). Participants with the third and the fourth quartile of LAP were more likely to develop prehypertension and hypertension than those with the first quartile in both male and female.

After adjusting for age, marital status and educational level, the risks of prehypertension (adjusted OR: 3.14, 95% CI: 1.95–5.07) and hypertension (adjusted OR: 9.02; 95% CI: 5.11–15.93) significantly increased in male participants with the fourth quartile compared with those with the first quartile. For the female, increased risks of prehypertension (adjusted OR: 3.26, 95% CI: 2.09–5.10) and hypertension (adjusted OR: 6.32; 95% CI: 3.42–11.65) were observed in participants with the

fourth LAP quartile compared with those with the first one.

After controlling for age, marital status, educational level, physical activity, smoker, drinker, BMI, WHR, fasting plasma glucose and family history of hypertension, the risks of prehypertension (adjusted OR: 1.67, 95% CI: 0.96–2.92) and hypertension (adjusted OR: 2.79, 95%CI: 1.43–5.44) significantly increased in male participants with the fourth quartile compared with those with the first quartile. Meanwhile, increased risks of prehypertension (adjusted OR: 2.10, 95% CI: 1.26–3.51) and hypertension (adjusted OR: 3.15, 95%CI: 1.56–6.39) were observed in female participants with the fourth LAP quartile compared with those with the first one.

The results of ROC curves analysis in males and females were shown in Figs. 1 and 2 and Table 4. LAP (AUC = 0.721; 95% CI: 0.680–0.761) was a better indicator to predict different types of hypertension than BMI (AUC = 0.698; 95% CI: 0.658–0.737), WHR (AUC = 0.684; 95% CI: 0.643–0.726) and TG (AUC = 0.663; 95% CI: 0.620–0.706) in females; however, WC (AUC = 0.734 95% CI: 0.700–0.769) performed better than BMI (AUC = 0.707, 95% CI: 0.672–0.742), WHR (AUC = 0.688; 95% CI: 0.650–0.725), LAP (AUC = 0.677; 95% CI: 0.640–0.713) and TG (AUC = 0.607; 95% CI: 0.568–0.646) in males. The best cut-off values of LAP to predict hypertension were 63.892 in males and 30.860 in females.

### Interaction effects between LAP and family history of hypertension

The interaction effects between LAP and family history of hypertension are presented in Table 5. Significant interaction effects between LAP and family history of hypertension were observed in males. The results of RERI (1.652; 95% CI: 0.267–3.037) and AP (0.516; 95% CI: 0.238–0.794) indicated a significant interaction effect of family history of hypertension and LAP on hypertension, but the result of SI (3.998; 95% CI: 0.897–17.820) did not.

However, no statistically significant interaction effects were found between LAP and family history of hypertension in females, as indicated by all the three indicators. RERI was - 0.673 (95% CI: -2.566–1.220); AP was -0.328 (95% CI: -1.451–0.795);

1 and SI was 0.610 (95% CI: 0.125–2.979).

2 **Discussion**

3 With the rapid development of the economy and sedentary lifestyle, elevated blood  
4 pressure has become a common and serious public health issue.<sup>31</sup> The prevalence of  
5 prehypertension and hypertension has significantly increased.<sup>32</sup> Elevated blood  
6 pressure is caused by diverse factors, among which obesity is closely related to  
7 hypertension.<sup>33</sup> An increase in body weight is typically followed by enhanced blood  
8 pressure.<sup>12</sup> Extensive studies have found that obesity, especially visceral adipose  
9 tissue, could strongly increase the blood pressure.<sup>33</sup>

10 The mechanisms underlying the interaction between obesity and hypertension are  
11 complicated. The mechanisms of obesity-induced hypertension include sodium  
12 retention, insulin resistance, activation of renin-angiotensin-aldosterone, altered  
13 vascular function, and secretion of relevant adipokines.<sup>34</sup> In addition, the mechanisms  
14 of blood pressure increase can be activated by visceral fat.<sup>35</sup>

15 Substantial evidences proved that the harm of the fat accumulation was greater than  
16 the total amount of fat.<sup>36, 37</sup> However, traditional obesity indexes, such as BMI, WC,  
17 and WHR, have some limitations when distinguishing between subcutaneous fat and  
18 visceral fat. Therefore, a new obesity index that can predict visceral fat easily and  
19 effectively is urgently needed. After Kahn first demonstrated that LAP performs  
20 better than BMI for recognizing the cardiovascular risk, domestic and foreign scholars  
21 have paid increasing attention to LAP. LAP, a combination of WC and TG, is an  
22 accessible and inexpensive way to assess visceral fat.<sup>13</sup> It is a well-known fact that TG  
23 can reflect the degree of visceral fat accumulation and WC is strongly associated with  
24 hypertension.<sup>12</sup> Notably, hypertriglyceridemic waist (HTGW) is also calculated based  
25 on the combination of TG and WC. However, LAP, a continuous indicator, is superior  
26 to reflect visceral fat than HTGW,<sup>38</sup> a discontinuous indicator.<sup>21</sup> Therefore, LAP was  
27 used as a visceral obesity indicator in this study.

28 LAP based on the hypothesis of minimum waist circumference includes the rachis,

1 abdominal viscera and muscle.<sup>13</sup> Therefore, the differences between the actual WC  
2 and the minimum WC can represent abdominal adipose tissue.<sup>13</sup> Notably, LAP in  
3 almost all studies is calculated by data obtained based on the third National Health  
4 and Nutrition Examination Survey in the United States.<sup>13</sup> Because of differences in  
5 race, dietary habits, or lifestyle, individuals from different countries should have  
6 different visceral adipose tissues. It has been demonstrated that there are considerable  
7 differences in visceral adipose tissues between Chinese individuals and Europeans or  
8 Americans.<sup>39</sup> Therefore, LAP was calculated in our study using a modified formula so  
9 that it could apply to the individuals dwelling in Southern China.

10 As expected, a significant association was found between LAP and hypertension in  
11 the present study. Our findings are consistent with those in studies by Zhong et al,<sup>17</sup>  
12 Song et al,<sup>37</sup> and Shen et al,<sup>22</sup> all of which have demonstrated that LAP is an effective  
13 and reliable diagnostic indicator of hypertension. Participants with significantly  
14 higher LAP had higher risks of prehypertension and hypertension than those with  
15 lower LAP. Multinomial logistic regression analysis revealed that after adjusting for  
16 other factors, the risks of prehypertension and hypertension in the group with the  
17 highest LAP level were 2.10 and 3.15 times higher in females, respectively, than  
18 those in the group with the lowest LAP.

19 Wang et al. found LAP is a better index to predict the risk of hypertension.<sup>40</sup>  
20 However, Gao et al found that the performance of LAP was superior to that of BMI in  
21 male Mongolians;<sup>23</sup> this findings may be due to the apparently lower prevalence of  
22 high TG in female Mongolians than in male Mongolians (13.20% vs 23.10%,  $P <$   
23 0.05), and the facts might disturb the association between LAP and hypertension in  
24 female Mongolians. Several study found the superiority of LAP over BMI for  
25 detection of hypertension and prehypertension in both genders.<sup>21,37,40</sup> However, in the  
26 present study, we also found that LAP perform better than BMI in female. According  
27 to Kahn,<sup>41</sup> the annual LAP changes were reduced at older age in male. Advancing age  
28 is associated with a progressive increase in systolic BP levels and with development  
29 and progression of arterial hypertension because of a number of factors, including

1  
2  
3  
4  
5  
6  
7  
8  
9  
10  
11  
12  
13  
14  
15  
16  
17  
18  
19  
20  
21  
22  
23  
24  
25  
26  
27  
28  
29  
30  
31  
32  
33  
34  
35  
36  
37  
38  
39  
40  
41  
42  
43  
44  
45  
46  
47  
48  
49  
50  
51  
52  
53  
54  
55  
56  
57  
58  
59  
60

atherosclerotic changes, large artery stiffening, altered renal function, and arterial baroreflex impairment.<sup>42</sup> That is to say, increase in blood pressure was thought to be an unavoidable consequence of aging. Thus, the superiority of LAP for predicting hypertension in male may be disturbed by the larger-scale proportion of elder man (23.7%) in our study. In our study, LAP perform better in predicting the hypertension risk than TG in both sex. However, due to low predictive value of TG in southern China, LAP which combines of TG and WC is slightly inferior to WC.

In general, LAP, which applied to the Southern Chinese population, was a better indicator for predicting the hypertension risk in females in this study. In addition, large studies have demonstrated that family history of hypertension is a critical risk factor for hypertension, and individuals with family history of hypertension are 2–4 times more likely to develop hypertension than those without the family history of hypertension.<sup>43</sup> The interaction analysis in this study indicates the synergistic effect of LAP and family history on the hypertension risk in males, but no statistically significant differences in the interaction effect in females. In fact, cardiovascular events occur at a lower rate in females than in males.<sup>44</sup> In our study, the female participants who had both LAP and family history of hypertension were rarely observed and the prevalence rates of hypertension at a lower rate in females than in males no matter premenopausal status or menopausal status.<sup>45</sup> Our study suffer from a small sample size, especially in females. The fewer positive female observers which had higher LAP and family history of hypertension lead to no statistically significant differences in the interaction effect on the hypertension risk in females. The interaction in female was not statistically significant, but their synergistic effect was obvious. The synergistic effect between family history of hypertension and LAP on the hypertension risk was demonstrated in our study as well as in other studies.<sup>21, 40</sup> Visceral obesity and family history of hypertension may result in increased blood pressure through some unknown mechanisms. However, further studies are needed to investigate the interaction effect between LAP and family history of hypertension on the hypertension risk.

To date, LAP is an inexpensive screening tool to identify visceral adipose tissue, and the method has high reproducibility. LAP, which was proposed by Kahn, was developed for the Western population. Thus this study explored the validity of LAP, which was calculated based on the Southern China population. The findings suggest LAP might perform better in predicting the hypertension risk than BMI, WHR and TG in Southern Chinese females.

This study has some limitations. First of all, because this is a cross-sectional study, the present results are not sufficient to indicate causality. Secondly, the population of our study can partially represent the general population in the Southern China, but can not fully represent this region. Furthermore, this article is lack of adjustment for renal function, and other risk factors for hypertension (such as serum uric acid). Finally, because of the small sample size in this study, further studies with a larger sample size are needed to investigate whether the modified LAP applies to all the residents dwelling in Southern China.

## CONCLUSION

In conclusion, LAP was significantly associated with the hypertension risk, and higher LAP levels had relatively higher blood pressure. LAP performed better in predicting hypertension than did BMI, WHR and TG in the Southern China female population. The synergistic effect of LAP and family history of hypertension was demonstrated..

## Acknowledgements

We gratefully acknowledge Dr. Pei-Xi Wang, Dr. Jin-Xiang Ma, Xin-Yu Bao, Yi-Xian Xie, Xiao-Xia Zhang, Xin Peng, Yan Liu and Meng-Jiao Cheng for their excellent work in study coordination, data collection, and management.

## Contributors

Jun-Xuan Huang, Pei-Xi Wang and Jin-Xiang Ma conceived and designed the study. Jun-Xuan Huang, Xin-Yu Bao, Yi-Xian Xie, Xiao-Xia Zhang, Xin Peng, Yan Liu and Meng-Jiao Cheng contributed to collection of the data, analyzed the data and interpretation of the results. Jun-Xuan Huang wrote the draft manuscript. Jin-Xiang

1  
2  
3  
4  
5  
6  
7  
8  
9  
10  
11  
12  
13  
14  
15  
16  
17  
18  
19  
20  
21  
22  
23  
24  
25  
26  
27  
28  
29  
30  
31  
32  
33  
34  
35  
36  
37  
38  
39  
40  
41  
42  
43  
44  
45  
46  
47  
48  
49  
50  
51  
52  
53  
54  
55  
56  
57  
58  
59  
60

Ma, Pei-Xi Wang and Jun-Xuan Huang finalized the manuscript with inputs from all authors. All of the authors approved the final version submitted for publication.

**Funding**

This study was supported by Talent Introduction Fund of Guangzhou Medical University (2009).

**Competing interests**

The authors declared that they had no conflict of interest.

**Ethics statement**

This study was approved by the Ethics Committee of Guangzhou Medical University. Written informed consent was obtained from each study participant before investigation.

**Data sharing statement**

Our data might not be shared directly, because it's our team work and the data belongs to our team. Thus consent should be attained from team members.

**References**

1. Kearney PM, Whelton M, Reynolds K, et al. Global burden of hypertension: analysis of worldwide data. *TheLancet* 2005;365(9455):217-223. doi:10.1016/S0140-6736(05)17741-1
2. Beaney T, Schutte AE, Tomaszewski M, et al. May Measurement Month 2017: an analysis of blood pressure screening results worldwide. *The Lancet Global Health* 2018;6(7):e736-e743. doi:10.1016/S2214-109X(18)30259-6
3. Bundy JD, He J. Hypertension and Related Cardiovascular Disease Burden in China. *Ann Glob Health* 2018;82(2):227-233. doi:10.1016/j.aogh.2016.02.002
4. Macia E, Gueye L, Duboz P. Hypertension and Obesity in Dakar, Senegal. *Plos One* 2016;11(9):e0161544. doi:10.1371/journal.pone.0161544
5. Tang L, Zhang F, Tong N. The association of visceral adipose tissue and subcutaneous adipose tissue with metabolic risk factors in a large population of Chinese adults. *Clin Endocrinol* 2016;85(1):46-53. doi:10.1111/cen.13013

- 1 6. Wandeler G, Paccaud F, Vollenweider P, et al. Strength of Family History in  
2 Predicting Levels of Blood Pressure, Plasma Glucose and Cholesterol. *Public*  
3 *Health Genom* 2010;13(3):143-154. doi:10.1159/000233228
- 4 7. Liu M, He Y, Jiang B, et al. Association Between Family History and  
5 Hypertension Among Chinese Elderly. *Medicine* 2015;94(48):e2226.  
6 doi:10.1097/MD.0000000000002226
- 7 8. Al-Safi SA, Aboul-Enein FH, Aboul-Enein BH, et al. Influence of family history  
8 and lifestyle on blood pressure and heart rate in young adults in Jordan. *Public*  
9 *Health* 2006;120(11):1027-1032. doi:10.1016/j.puhe.2006.06.009
- 10 9. Alhawari HH, Al-Shelleh S, Alhawari HH, et al. Blood Pressure and Its  
11 Association with Gender, Body Mass Index, Smoking, and Family History  
12 among University Students. *Int J Hypertens* 2018;2018:1-5.  
13 doi:10.1155/2018/4186496
- 14 10. Ibrahim MM. Subcutaneous and visceral adipose tissue: structural and functional  
15 differences. *Obes Rev* 2010;11(1):11-18. doi:10.1111/j.1467-789X.2009.00623.x
- 16 11. Chen W, Wilson JL, Khaksari M, et al. Abdominal fat analyzed by DEXA scan  
17 reflects visceral body fat and improves the phenotype description and the  
18 assessment of metabolic risk in mice. *Am J Physiol-Endoc M*  
19 2012;303(5):E635-E643. doi:10.1152/ajpendo.00078.2012
- 20 12. Nurdiantami Y, Watanabe K, Tanaka E, et al. Association of general and central  
21 obesity with hypertension. *Clin Nutr* 2018;37(4):1259-1263.  
22 doi:10.1016/j.clnu.2017.05.012
- 23 13. Kahn HS. The "lipid accumulation product" performs better than the body mass  
24 index for recognizing cardiovascular risk: a population-based comparison. *Bmc*  
25 *Cardiovasc Disor* 2005;5(1):26-26. doi:10.1186/1471-2261-5-26
- 26 14. Ray L, Ravichandran K, Nanda SK. Comparison of Lipid Accumulation Product  
27 Index with Body Mass Index and Waist Circumference as a Predictor of  
28 Metabolic Syndrome in Indian Population. *Metab Syndr Relat D*  
29 2018;16(5):240-245. doi:10.1089/met.2017.0119
- 30 15. Cicero A F G, Gitto S, Fogacci F, et al. Fatty liver index is associated to pulse

- 1 wave velocity in healthy subjects: Data from the Brisighella Heart Study.
  - 2
  - 3
  - 4
  - 5
  - 6
  - 7
  - 8
  - 9
  - 10
  - 11
  - 12
  - 13
  - 14
  - 15
  - 16
  - 17
  - 18
  - 19
  - 20
  - 21
  - 22
  - 23
  - 24
  - 25
  - 26
  - 27
  - 28
  - 29
  - 30
  - 31
  - 32
  - 33
  - 34
  - 35
  - 36
  - 37
  - 38
  - 39
  - 40
  - 41
  - 42
  - 43
  - 44
  - 45
  - 46
  - 47
  - 48
  - 49
  - 50
  - 51
  - 52
  - 53
  - 54
  - 55
  - 56
  - 57
  - 58
  - 59
  - 60
- 1 wave velocity in healthy subjects: Data from the Brisighella Heart Study.
- 2 *European Journal of Internal Medicine* 2018:S0953620518301262.
- 3 doi:10.1097/01.hjr.0000136566.89429.63
- 4 16. Lee JW, Lim NK, Park HY. The product of fasting plasma glucose and
- 5 triglycerides improves risk prediction of type 2 diabetes in middle-aged
- 6 Koreans. *Bmc Endocr Disord* 2018;18(1):33. doi:10.1186/s12902-018-0259-x
- 7 17. Zhong C, Xia W, Zhong X, et al. Lipid Accumulation Product and Hypertension
- 8 Related to Stroke: a 9.2-Year Prospective Study Among Mongolians in China. *J*
- 9 *Atheroscler Thromb* 2016;23(7):830-838. doi:10.5551/jat.33514
- 10 18. Cicero A F G, D"Addato S, Reggi A, et al. Gender Difference in Hepatic Steatosis
- 11 Index and Lipid Accumulation Product Ability to Predict Incident Metabolic
- 12 Syndrome in the Historical Cohort of the Brisighella Heart Study. *Metabolic*
- 13 *Syndrome and Related Disorders* 2013; 11(6):412-416.
- 14 19. Wakabayashi I. Associations of Blood Lipid-Related Indices with Blood Pressure
- 15 and Pulse Pressure in Middle-Aged Men. *Metab Syndr Relat D* 2015;13(1):22-28.
- 16 doi:10.1089/met.2014.0093
- 17 20. de Oliveira CC, Roriz AKC, Ramos LB, et al. Indicators of Adiposity Predictors
- 18 of Metabolic Syndrome in the Elderly. *Ann Nutr Metab* 2017;70(1):9-15.
- 19 doi:10.1159/000455333
- 20 21. Song J, Chen X, Zhao Y, et al. Risk factors for prehypertension and their
- 21 interactive effect: a cross- sectional survey in China. *Bmc Cardiovasc Disor*
- 22 2018;18(1). doi:10.1186/s12872-018-0917-y
- 23 22. Shen YY, Chen JC, Li G, et al. Relationship of lipid accumulation product with
- 24 hypertension and diabetes among Beijing residents study. *Zhonghua yu fang yi*
- 25 *xue za zhi [Chinese journal of preventive medicine]* 2017;51(5):415.
- 26 23. Gao X, Wang G, Wang A, et al. Comparison of lipid accumulation product with
- 27 body mass index as an indicator of hypertension risk among Mongolians in
- 28 China. *Obes Res Clin Pract* 2013;7(4):e308-e314.
- 29 doi:10.1016/j.orcp.2012.02.002
- 30 24. Song F , Cho M S . Geography of Food Consumption Patterns between South and

- 1 North China. *Foods* 2017;6(5). doi:10.3390/foods6050034.
- 2 25. Huang Z , Wu X , Stamler J , et al. A north-south comparison of blood pressure  
3 and factors related to blood pressure in the People's Republic of China: a report  
4 from the PRC-USA Collaborative Study of Cardiovascular Epidemiology.  
5 *Journal of Hypertension* 1994; 12(9):1103-12.
- 6 26. Wu Z , Yao C , Zhao D , et al. Cardiovascular disease risk factor levels and their  
7 relations to CVD rates in China--results of Sino-MONICA project. *European*  
8 *Journal of Cardiovascular Prevention & Rehabilitation* 2004; 11(4):275-283.
- 9 27. Zhao L, Stamler J, Yan L L, et al. Blood Pressure Differences Between Northern  
10 and Southern Chinese: Role of Dietary Factors The International Study on  
11 Macronutrients and Blood Pressure. *Hypertension* 2004; 43(6):1332-1337.
- 12 28. Rosenberg DE, Bull FC, Marshall AL, Sallis JF, Bauman AE. Assessment of  
13 sedentary behavior with the international physical activity questionnaire.  
14 *J Phys Act Health*. 2008;5:S30-44.
- 15 29. Zhang M, Batu B, Tong W, et al. Prehypertension and Cardiovascular Risk Factor  
16 Clustering Among Mongolian Population in Rural and Animal Husbandry Area,  
17 Inner Mongolia, China. *Circ J* 2009;73(8):1437-1441.  
18 doi:10.1253/circj.CJ-09-0101
- 19 30. Andersson T, Alfredsson L, Källberg H, et al. Calculating measures of biological  
20 interaction. *Eur J Epidemiol* 2005;20(7):575-579.  
21 doi:10.1007/s10654-005-7835-x
- 22 31. Lackland DT, Beilin LJ, Campbell NRC, et al. Global Implications of Blood  
23 Pressure Thresholds and Targets. *Hypertension* 2018;71(6):985-987.  
24 doi:10.1161/HYPERTENSIONAHA.118.11280
- 25 32. Wang Z, Zeng X, Chen Z, et al. Association of visceral and total body fat with  
26 hypertension and prehypertension in a middle-aged Chinese population. *J*  
27 *Hypertens* 2015;33(8):1555-62. doi:10.1097/HJH.0000000000000602
- 28 33. Stabouli S, Papakatsika S, Kotsis V. The role of obesity, salt and exercise on  
29 blood pressure in children and adolescents. *Expert Rev Cardiovasc Ther*  
30 2011;9(6):753-61. doi:10.1586/erc.11.63

1  
2  
3  
4  
5  
6  
7  
8  
9  
10  
11  
12  
13  
14  
15  
16  
17  
18  
19  
20  
21  
22  
23  
24  
25  
26  
27  
28  
29  
30  
31  
32  
33  
34  
35  
36  
37  
38  
39  
40  
41  
42  
43  
44  
45  
46  
47  
48  
49  
50  
51  
52  
53  
54  
55  
56  
57  
58  
59  
60

34. Kotchen TA. Obesity-Related Hypertension: Epidemiology, Pathophysiology, and Clinical Management. *Am J Hypertens* 2010;23(11):1170-1178. doi:10.1038/ajh.2010.172

35. Boscaro M, Giacchetti G, Ronconi V. Visceral adipose tissue: emerging role of gluco- and mineralocorticoid hormones in the setting of cardiometabolic alterations: Adipose tissue and adrenal hormones. *Ann Ny Acad Sci* 2012;1264(1):87-102. doi:10.1111/j.1749-6632.2012.06597.x

36. Li Y, Bujo H, Takahashi K, et al. Visceral fat: higher responsiveness of fat mass and gene expression to calorie restriction than subcutaneous fat. *Exp Biol Med (Maywood)* 2003;228(10):1118-23.

37. Song J, Zhao Y, Nie S, et al. The effect of lipid accumulation product and its interaction with other factors on hypertension risk in Chinese Han population: A cross-sectional study. *Plos One* 2018;13(6):e0198105. doi:10.1371/journal.pone.0198105

38. Janghorbani M, Aminorroaya A, Amini M. Comparison of Different Obesity Indices for Predicting Incident Hypertension. *High Blood Pressure & Cardiovascular Prevention* 2017;24(2):157-166. doi:10.1007/s40292-017-0186-3

39. Nazare J, Smith JD, Borel A, et al. Ethnic influences on the relations between abdominal subcutaneous and visceral adiposity, liver fat, and cardiometabolic risk profile: the International Study of Prediction of Intra-Abdominal Adiposity and Its Relationship With Cardiometabolic Risk/Intra-Abdominal Adiposity. *The American Journal of Clinical Nutrition* 2012;96(4):714-726. doi:10.3945/ajcn.112.035758

40. Wang H, Chen Y, Sun G, et al. Validity of cardiometabolic index, lipid accumulation product, and body adiposity index in predicting the risk of hypertension in Chinese population. *Postgraduate Medicine* 2018;130(3):325-333. doi:10.1080/00325481.2018.1444901

41. Kahn H S, Cheng Y J. Longitudinal changes in BMI and in an index estimating excess lipids among white and black adults in the United States. *Int J Obes* 2008; 32(1):136-143.

42. Pinto E. Blood pressure and ageing. *Postgrad Med J* 2007; Feb;83(976):109-14.  
doi: 10.1136/pgmj.2006.048371
43. TOZAWA M, OSHIRO S, ISEKI C, et al. Family History of Hypertension and  
Blood Pressure in a Screened Cohort. *Hypertens Res* 2001;24(2):93-98.  
doi:10.1291/hypres.24.93
44. Doumas M, Papademetriou V, Faselis C, et al. Gender Differences in  
Hypertension: Myths and Reality. *Curr Hypertens Rep* 2013;15(4):321-330.  
doi:10.1007/s11906-013-0359-y
45. Ramezani TF, Behboudi-Gandevani S, Ghanbarian A, et al. Effect of menopause  
on cardiovascular disease and its risk factors: a 9-year follow-up study.  
*Climacteric*. 2014 Apr;17(2):164-72. doi: 10.3109/13697137.2013.828197.

### The titles and legends of figure

#### Title

**Fig.1** The ROC curve of different obesity indexes in predicting hypertension in males.

#### legend

LAP: lipid accumulation product; BMI: body mass index; WHR: waist-hip ratio; WC: waist circumference; TG: Triglyceride.

#### Title

**Fig.2** The ROC curve of different obesity indexes in predicting hypertension in females.

#### legend

LAP: lipid accumulation product; BMI: body mass index; WHR: waist-hip ratio; WC: waist circumference; TG: Triglyceride.

**Table 1** Basic characteristics of the participants

| Variables                     | Normotension<br>(N = 832) | Prehypertension<br>(N = 789) | Hypertension<br>(N = 458) | $\chi^2 / Z$ | P-value |
|-------------------------------|---------------------------|------------------------------|---------------------------|--------------|---------|
| Sex (%)                       |                           |                              |                           | 135.625      | < 0.001 |
| Male                          | 32.57                     | 58.68                        | 58.52                     |              |         |
| Female                        | 67.43                     | 41.32                        | 41.48                     |              |         |
| Age (years)                   | 36.42 ± 10.59             | 41.38 ± 12.71                | 48.93 ± 12.75             | 267.206      | < 0.001 |
| Marital status (%)            |                           |                              |                           | 21.287       | < 0.001 |
| Currently not married         | 23.20                     | 18.76                        | 12.66                     |              |         |
| Currently married             | 76.80                     | 81.24                        | 87.34                     |              |         |
| Education level (%)           |                           |                              |                           | 101.355      | < 0.001 |
| Elementary school and lower   | 15.87                     | 21.55                        | 36.46                     |              |         |
| Secondary school              | 36.30                     | 38.53                        | 39.96                     |              |         |
| Senior high school and higher | 47.83                     | 39.92                        | 23.58                     |              |         |
| Physical activity (%)         |                           |                              |                           | 2.688        | 0.611   |

|                 |       |       |       |         |         |
|-----------------|-------|-------|-------|---------|---------|
| Seldom or never | 35.70 | 34.22 | 31.22 |         |         |
| Moderate        | 17.43 | 18.25 | 18.78 |         |         |
| High            | 46.87 | 47.53 | 50.00 |         |         |
| Smoker (%)      |       |       |       | 50.346  | < 0.001 |
| Non-smoker      | 82.25 | 71.61 | 67.90 |         |         |
| Smoker          | 16.18 | 26.87 | 28.61 |         |         |
| Former smoker   | 0.97  | 1.52  | 3.49  |         |         |
| Drinker (%)     |       |       |       | 30.865  | < 0.001 |
| Non-drinker     | 84.11 | 76.34 | 72.53 |         |         |
| Drinker         | 14.91 | 22.39 | 24.62 |         |         |
| Former drinker  | 0.98  | 1.27  | 2.85  |         |         |
| BMI             |       |       |       | 255.012 | < 0.001 |
| < 18.5          | 13.70 | 5.20  | 2.18  |         |         |
| 18.5–23.9       | 68.51 | 54.88 | 41.70 |         |         |
| 24–27.9         | 14.30 | 31.69 | 37.55 |         |         |

|                                    |               |               |                |          |         |
|------------------------------------|---------------|---------------|----------------|----------|---------|
| ≥ 28                               | 3.49          | 8.24          | 18.56          |          |         |
| WC                                 | 75.61±8.19    | 81.61±9.04    | 87.02±9.95     | 411.441  | < 0.001 |
| WHR                                | 0.85± 0.06    | 0.88± 0.07    | 0.91± 0.06     | 248.475  | < 0.001 |
| Fasting plasma glucose (mmol/L)    | 4.69 ± 0.82   | 4.98 ± 1.33   | 5.31 ± 1.86    | 90.399   | < 0.001 |
| Total cholesterol (mmol/L)         | 4.70 ± 0.96   | 4.98 ± 1.07   | 5.26 ± 1.15    | 88.325   | < 0.001 |
| Triglyceride (mmol/L)              | 1.26 ± 0.83   | 1.77 ± 1.77   | 2.15 ± 2.25    | 178.995  | < 0.001 |
| Systolic blood pressure (mmHg)     | 107.97 ± 7.80 | 125.45 ± 6.65 | 144.78 ± 18.55 | 1533.137 | < 0.001 |
| Diastolic blood pressure (mmHg)    | 69.49 ± 6.40  | 79.59 ± 5.99  | 91.49 ± 11.33  | 1206.505 | < 0.001 |
| Family history of hypertension (%) |               |               |                | 18.391   | 0.005   |
| Only father                        | 11.42         | 11.03         | 11.14          |          |         |
| Only mother                        | 12.02         | 15.08         | 17.25          |          |         |
| Both parents                       | 5.41          | 4.82          | 8.95           |          |         |
| Neither                            | 71.15         | 69.07         | 62.66          |          |         |
| LAP                                | 29.14 ± 27.00 | 52.15 ± 63.50 | 75.87 ± 99.81  | 355.133  | < 0.001 |

1 BMI: body mass index; WC: waist circumference; WHR: waist-hip rate; LAP: lipid accumulation product.

**Table 2** Comparison of blood pressure among four quartiles of LAP

| Variables                       | LAP            |                |                |                | Z       | P-value |
|---------------------------------|----------------|----------------|----------------|----------------|---------|---------|
|                                 | Q1             | Q2             | Q3             | Q4             |         |         |
| Male                            |                |                |                |                |         |         |
| Systolic blood pressure (mmHg)  | 119.33 ± 13.72 | 125.61 ± 14.86 | 129.23 ± 16.38 | 133.36 ± 17.85 | 106.793 | < 0.001 |
| Diastolic blood pressure (mmHg) | 75.84 ± 9.89   | 80.55 ± 9.84   | 82.56 ± 10.74  | 85.64 ± 11.36  | 106.285 | < 0.001 |
| Female                          |                |                |                |                |         |         |
| Systolic blood pressure (mmHg)  | 110.45 ± 13.91 | 114.95 ± 15.07 | 119.66 ± 15.91 | 130.25 ± 19.78 | 184.926 | < 0.001 |
| Diastolic blood pressure (mmHg) | 71.05 ± 9.45   | 73.29 ± 9.60   | 76.21 ± 9.96   | 81.04 ± 11.70  | 134.730 | < 0.001 |

**Table 3** Multinomial logistic regression analysis of LAP associated with hypertension status

| Quartiles of LAP | OR <sup>a</sup> (95% CI) |               | OR <sup>b</sup> (95% CI) |               | OR <sup>c</sup> (95% CI) |               |
|------------------|--------------------------|---------------|--------------------------|---------------|--------------------------|---------------|
|                  | prehypertension          | hypertension  | prehypertension          | hypertension  | prehypertension          | hypertension  |
| Male             |                          |               |                          |               |                          |               |
| Q1               | 1 (reference)            | 1 (reference) | 1 (reference)            | 1 (reference) | 1 (reference)            | 1 (reference) |

|        |    |                         |                            |                         |                          |                       |                         |
|--------|----|-------------------------|----------------------------|-------------------------|--------------------------|-----------------------|-------------------------|
| Female | Q2 | 2.98***<br>(1.88, 4.72) | 4.70***<br>(2.34, 9.45)    | 2.22***<br>(1.48, 3.34) | 2.38**<br>(1.36, 4.16)   | 1.73*<br>(1.12, 2.67) | 1.61<br>(0.89, 2.94)    |
|        | Q3 | 4.48***<br>(2.85, 7.03) | 8.26***<br>(4.21, 16.21)   | 2.68***<br>(1.74, 4.12) | 3.90***<br>(2.24, 6.82)  | 1.66*<br>(1.03, 2.68) | 1.75<br>(0.94, 3.26)    |
|        | Q4 | 4.65***<br>(2.93, 7.36) | 17.82***<br>(9.21, 34.46)  | 3.14***<br>(1.95, 5.07) | 9.02***<br>(5.11, 15.93) | 1.67<br>(0.96, 2.92)  | 2.79***<br>(1.43, 5.44) |
|        | Q1 | 1 (reference)           | 1 (reference)              | 1 (reference)           | 1 (reference)            | 1 (reference)         | 1 (reference)           |
|        | Q2 | 1.75**<br>(1.22, 2.51)  | 2.19**<br>(1.27, 3.77)     | 1.046<br>(0.69,1.58)    | 1.19<br>(0.62,2.29)      | 0.91<br>(0.59,1.41)   | 1.015<br>(0.51,2.03)    |
|        | Q3 | 3.35***<br>(2.27, 4.93) | 6.50***<br>(3.83, 11.02)   | 1.68**<br>(1.11,2.52)   | 1.87<br>(0.99,3.49)      | 1.31<br>(0.84,2.05)   | 1.19<br>(0.60,2.38)     |
|        | Q4 | 5.99***<br>(3.74, 9.59) | 20.06***<br>(11.37, 35.38) | 3.26***<br>(2.09,5.10)  | 6.32***<br>(3.42,11.65)  | 2.10**<br>(1.26,3.51) | 3.15***<br>(1.56,6.39)  |
|        |    |                         |                            |                         |                          |                       |                         |
|        |    |                         |                            |                         |                          |                       |                         |
|        |    |                         |                            |                         |                          |                       |                         |
|        |    |                         |                            |                         |                          |                       |                         |
|        |    |                         |                            |                         |                          |                       |                         |

1 OR=Odds ratio; CI=confidence interval; \*\*\*,  $P < 0.001$ ; \*\*,  $P < 0.01$ ; \*,  $P < 0.05$ .  
2 <sup>a</sup>, unadjusted.  
3 <sup>b</sup>, adjusted for age, sex, marital status, educational level

1   <sup>c</sup>, adjusted for physical activity, smoker, drinker, BMI, WHR, fasting plasma glucose, family history of hypertension, and all the factors in b.

2

3   **Table 4** Predicting hypertension by different obesity indexes

| Variables     | Cut-off value | Sensitivity (%) | Specificity (%) | Youden Index | AUC(95% CI)          | P-value |
|---------------|---------------|-----------------|-----------------|--------------|----------------------|---------|
| <b>Male</b>   |               |                 |                 |              |                      |         |
| BMI           | 23.004        | 73.51           | 58.08           | 0.316        | 0.707 (0.672, 0.742) | < 0.001 |
| WHR           | 0.906         | 58.58           | 70.27           | 0.289        | 0.688 (0.650, 0.725) | < 0.001 |
| LAP           | 63.892        | 49.63           | 76.99           | 0.266        | 0.677 (0.640, 0.713) | < 0.001 |
| WC            | 85.05         | 65.67           | 72.60           | 0.383        | 0.734 (0.700, 0.769) | < 0.001 |
| TG            | 1.91          | 46.27           | 70.14           | 0.164        | 0.607 (0.568, 0.646) | < 0.001 |
| <b>Female</b> |               |                 |                 |              |                      |         |
| BMI           | 21.767        | 81.58           | 50.73           | 0.323        | 0.698 (0.658, 0.737) | < 0.001 |
| WHR           | 0.860         | 74.21           | 55.24           | 0.294        | 0.684 (0.643, 0.726) | < 0.001 |
| LAP           | 30.860        | 68.95           | 67.42           | 0.363        | 0.721 (0.680, 0.761) | < 0.001 |
| WC            | 79.90         | 72.11           | 64.94           | 0.370        | 0.725 (0.686, 0.766) | < 0.001 |

|    |      |       |       |       |                      |         |
|----|------|-------|-------|-------|----------------------|---------|
| TG | 1.26 | 63.68 | 64.49 | 0.282 | 0.663 (0.620, 0.706) | < 0.001 |
|----|------|-------|-------|-------|----------------------|---------|

BMI: body mass index; WHR: waist-hip rate; LAP: lipid accumulation product; WC: waist circumference; TG: Triglyceride; AUC: area under curve; OR=Odds ratio; CI=confidence interval.

**Table 5** Interaction effects between LAP and family history of hypertension

| Variables        | Variables                   | N   | OR <sup>c</sup> (95% CI) | Interaction indexes (95% CI)  |
|------------------|-----------------------------|-----|--------------------------|-------------------------------|
| <b>Male</b>      |                             |     |                          |                               |
| LAP <sup>a</sup> | Family history <sup>b</sup> |     |                          |                               |
| -                | -                           | 486 | 1 (reference)            | RERI = 1.652 (0.267, 3.037)*  |
| -                | +                           | 215 | 1.189 (0.772, 1.832)     | AP = 0.516 (0.238, 0.794)*    |
| +                | -                           | 173 | 1.362 (0.875, 2.121)     | SI = 3.998 (0.897, 17.820)    |
| +                | +                           | 128 | 3.203*** (2.002, 5.124)  |                               |
| <b>Female</b>    |                             |     |                          |                               |
| LAP <sup>a</sup> | Family history <sup>b</sup> |     |                          |                               |
| -                | -                           | 657 | 1 (reference)            | RERI = -0.673 (-2.566, 1.220) |

|   |   |     |                        |                             |
|---|---|-----|------------------------|-----------------------------|
| - | + | 276 | 1.995** (1.284, 3.099) | AP = -0.328 (-1.451, 0.795) |
| + | - | 108 | 1.729* (1.023, 2.922)  | SI = 0.610 (0.125, 2.979)   |
| + | + | 36  | 2.051 (0.919, 4.589)   |                             |

LAP: lipid accumulation production; RERI: relative excess risk of interaction ; AP: attributable proportion due to interaction; SI: synergy index; OR=Odds ratio; CI=confidence interval; \*\*\*,  $P < 0.001$ ; \*\*,  $P < 0.01$ ; \*,  $P < 0.05$ .

<sup>a</sup>, grouped by the cut-off values in Table 4.

<sup>b</sup>, family history of hypertension was defined as one parent or both parents having hypertension.

<sup>c</sup>, adjusted for age, marital status, educational level, physical activity, smoker, drinker, BMI, and WHR.

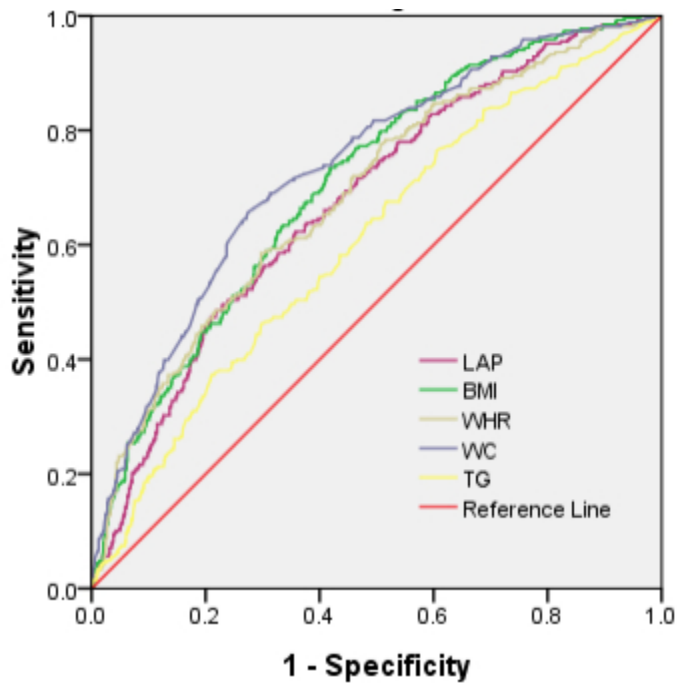

Fig.1 The ROC curve of different obesity indexes in predicting hypertension in males.  
legend  
LAP: lipid accumulation product; BMI: body mass index; WHR: waist-hip ratio; WC: waist circumference;  
TG: Triglyceride.

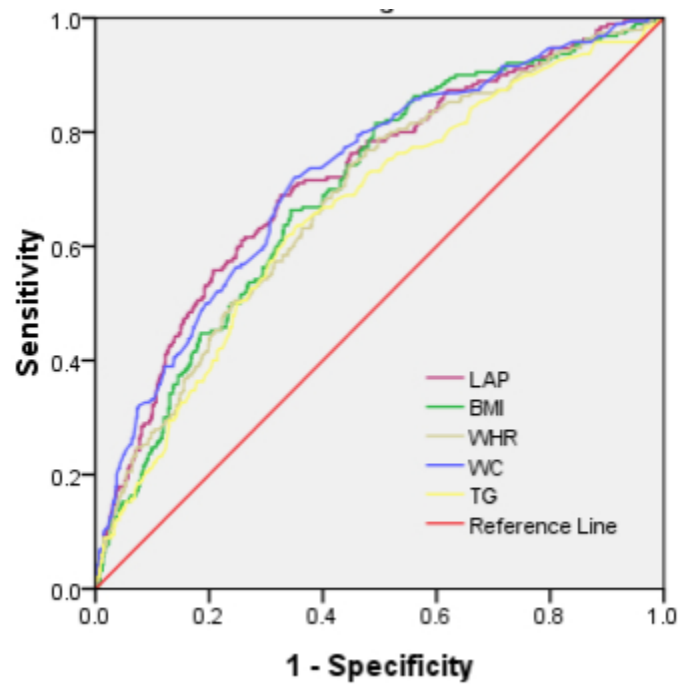

Fig.2 The ROC curve of different obesity indexes in predicting hypertension in females.  
legend  
LAP: lipid accumulation product; BMI: body mass index; WHR: waist-hip ratio; WC: waist circumference;  
TG: Triglyceride.

STROBE 2007 (v4) Statement—Checklist of items that should be included in reports of *cross-sectional studies*

| Section/Topic             | Item # | Recommendation                                                                                                                                                                       | Reported on page # |
|---------------------------|--------|--------------------------------------------------------------------------------------------------------------------------------------------------------------------------------------|--------------------|
| Title and abstract        | 1      | (a) Indicate the study’s design with a commonly used term in the title or the abstract                                                                                               | Page 1             |
|                           |        | (b) Provide in the abstract an informative and balanced summary of what was done and what was found                                                                                  | Page 2             |
| Introduction              |        |                                                                                                                                                                                      |                    |
| Background/rationale      | 2      | Explain the scientific background and rationale for the investigation being reported                                                                                                 | Page 4-5           |
| Objectives                | 3      | State specific objectives, including any prespecified hypotheses                                                                                                                     | Page 5             |
| Methods                   |        |                                                                                                                                                                                      |                    |
| Study design              | 4      | Present key elements of study design early in the paper                                                                                                                              | Page 5             |
| Setting                   | 5      | Describe the setting, locations, and relevant dates, including periods of recruitment, exposure, follow-up, and data collection                                                      | Page 5             |
| Participants              | 6      | (a) Give the eligibility criteria, and the sources and methods of selection of participants                                                                                          | Page 5-6           |
| Variables                 | 7      | Clearly define all outcomes, exposures, predictors, potential confounders, and effect modifiers. Give diagnostic criteria, if applicable                                             | Page 6-7           |
| Data sources/ measurement | 8*     | For each variable of interest, give sources of data and details of methods of assessment (measurement). Describe comparability of assessment methods if there is more than one group | Page 6-7           |
| Bias                      | 9      | Describe any efforts to address potential sources of bias                                                                                                                            | Page 3             |
| Study size                | 10     | Explain how the study size was arrived at                                                                                                                                            | Page 6             |
| Quantitative variables    | 11     | Explain how quantitative variables were handled in the analyses. If applicable, describe which groupings were chosen and why                                                         | Page 7-8           |
| Statistical methods       | 12     | (a) Describe all statistical methods, including those used to control for confounding                                                                                                | Page 7-8           |
|                           |        | (b) Describe any methods used to examine subgroups and interactions                                                                                                                  | Page 7-8           |
|                           |        | (c) Explain how missing data were addressed                                                                                                                                          | Page 5             |
|                           |        | (d) If applicable, describe analytical methods taking account of sampling strategy                                                                                                   | Page 5             |
|                           |        | (e) Describe any sensitivity analyses                                                                                                                                                | Not applicable     |
| Results                   |        |                                                                                                                                                                                      |                    |

|                          |     |                                                                                                                                                                                                              |                                      |
|--------------------------|-----|--------------------------------------------------------------------------------------------------------------------------------------------------------------------------------------------------------------|--------------------------------------|
| Participants             | 13* | (a) Report numbers of individuals at each stage of study—eg numbers potentially eligible, examined for eligibility, confirmed eligible, included in the study, completing follow-up, and analysed            | Page 8-9; Table 1                    |
|                          |     | (b) Give reasons for non-participation at each stage                                                                                                                                                         | Not application                      |
|                          |     | (c) Consider use of a flow diagram                                                                                                                                                                           | Not application                      |
| Descriptive data         | 14* | (a) Give characteristics of study participants (eg demographic, clinical, social) and information on exposures and potential confounders                                                                     | Page 8-9; Table 1                    |
|                          |     | (b) Indicate number of participants with missing data for each variable of interest                                                                                                                          | Not application                      |
| Outcome data             | 15* | Report numbers of outcome events or summary measures                                                                                                                                                         | Page 8-9; Table 1                    |
| Main results             | 16  | (a) Give unadjusted estimates and, if applicable, confounder-adjusted estimates and their precision (eg, 95% confidence interval). Make clear which confounders were adjusted for and why they were included | Page 9-10; Table 3; Table 5          |
|                          |     | (b) Report category boundaries when continuous variables were categorized                                                                                                                                    | Page 6-8; Table 1; Table 2 ; Table 5 |
|                          |     | (c) If relevant, consider translating estimates of relative risk into absolute risk for a meaningful time period                                                                                             | Not application                      |
| Other analyses           | 17  | Report other analyses done—eg analyses of subgroups and interactions, and sensitivity analyses                                                                                                               | Page 10-11; Table 5                  |
| <b>Discussion</b>        |     |                                                                                                                                                                                                              |                                      |
| Key results              | 18  | Summarise key results with reference to study objectives                                                                                                                                                     | Page 12-14                           |
| Limitations              | 19  | Discuss limitations of the study, taking into account sources of potential bias or imprecision. Discuss both direction and magnitude of any potential bias                                                   | Page 14                              |
| Interpretation           | 20  | Give a cautious overall interpretation of results considering objectives, limitations, multiplicity of analyses, results from similar studies, and other relevant evidence                                   | Page 12-14                           |
| Generalisability         | 21  | Discuss the generalisability (external validity) of the study results                                                                                                                                        | Page 13                              |
| <b>Other information</b> |     |                                                                                                                                                                                                              |                                      |
| Funding                  | 22  | Give the source of funding and the role of the funders for the present study and, if applicable, for the original study on which the present article is based                                                | Page 14-15                           |

\*Give information separately for cases and controls in case-control studies and, if applicable, for exposed and unexposed groups in cohort and cross-sectional studies.

**Note:** An Explanation and Elaboration article discusses each checklist item and gives methodological background and published examples of transparent reporting. The STROBE checklist is best used in conjunction with this article (freely available on the Web sites of PLoS Medicine at <http://www.plosmedicine.org/>, Annals of Internal Medicine at <http://www.annals.org/>, and Epidemiology at <http://www.epidem.com/>). Information on the STROBE Initiative is available at [www.strobe-statement.org](http://www.strobe-statement.org).

# BMJ Open

## Interaction of lipid accumulation product and family history of hypertension on hypertension risk: A cross-sectional study in the Southern Chinese population

|                                 |                                                                                                                                                                                                                                                                                                                                                                                                                                                                 |
|---------------------------------|-----------------------------------------------------------------------------------------------------------------------------------------------------------------------------------------------------------------------------------------------------------------------------------------------------------------------------------------------------------------------------------------------------------------------------------------------------------------|
| Journal:                        | <i>BMJ Open</i>                                                                                                                                                                                                                                                                                                                                                                                                                                                 |
| Manuscript ID                   | bmjopen-2019-029253.R2                                                                                                                                                                                                                                                                                                                                                                                                                                          |
| Article Type:                   | Original research                                                                                                                                                                                                                                                                                                                                                                                                                                               |
| Date Submitted by the Author:   | 06-Oct-2019                                                                                                                                                                                                                                                                                                                                                                                                                                                     |
| Complete List of Authors:       | Huang, junxuan; Guangzhou Medical University<br>Bao, XinYu; Guangzhou Medical University<br>Xie, yixian; Guangzhou Medical University<br>Zhang, xiaoxia; Guangzhou Medical University<br>Peng, xin; Guangzhou Medical University<br>Liu, yan; Guangzhou Medical University<br>Cheng, mengjiao; Guangzhou Medical University<br>Ma, JinXiang; Guangzhou Medical University<br>wang, peixi; General Practice Center, Nanhai Hospital, Southern Medical University |
| <b>Primary Subject Heading</b>: | Public health                                                                                                                                                                                                                                                                                                                                                                                                                                                   |
| Secondary Subject Heading:      | Epidemiology, Diabetes and endocrinology                                                                                                                                                                                                                                                                                                                                                                                                                        |
| Keywords:                       | Hypertension < CARDIOLOGY, LAP, Family history, Interaction effect                                                                                                                                                                                                                                                                                                                                                                                              |
|                                 |                                                                                                                                                                                                                                                                                                                                                                                                                                                                 |

SCHOLARONE™  
Manuscripts

1  
2  
3  
4  
5  
6  
7  
8  
9  
10  
11  
12  
13  
14  
15  
16  
17  
18  
19  
20  
21  
22  
23  
24  
25  
26  
27  
28  
29  
30  
31  
32  
33  
34  
35  
36  
37  
38  
39  
40  
41  
42  
43  
44  
45  
46  
47  
48  
49  
50  
51  
52  
53  
54  
55  
56  
57  
58  
59  
60

**Interaction of lipid accumulation product and family history of hypertension on hypertension risk: A cross-sectional study in the Southern Chinese population**

Jun-Xuan Huang<sup>1</sup>, Xin-Yu Bao<sup>1</sup>, Yi-Xian Xie<sup>1</sup>, Xiao-Xia Zhang<sup>1</sup>, Xin Peng<sup>1</sup>, Yan Liu<sup>1</sup>, Meng-Jiao Cheng<sup>1</sup>, Jin-Xiang Ma<sup>1\*</sup> and Pei-Xi Wang<sup>2\*</sup>

**Institution address:**

<sup>1</sup>Guangzhou Medical University, Guangzhou, 510182, China.  
<sup>2</sup>General Practice Center, Nanhai Hospital, Southern Medical University, Foshan, 528244, China.

**Email address:**

circle\_wong@yeah.net (J.-X.H.); 1027473041@qq.com (X.-Y.B.);  
yixian.xie@yahoo.com (Y.-X.X.); zhangxiaoxia405@163.com (X.-X.Z.);  
609167985@qq.com (X.P.); 1763136904@qq.com (Y.L.);  
15700727758@163.com (M.-J.C.); mjx777108@hotmail.com (J.-X.M);  
peixi001@163.com (P.-X.W.)

\* Author to whom correspondence should be addressed; E-mail:  
mjx777108@hotmail.com, peixi001@163.com

## 1 ABSTRACT

2 **Objectives:** This study aimed at investigating the applicability of a novel index based  
3 on waist circumference (WC) and Triglyceride (TG) which was named lipid  
4 accumulation product (LAP) in the Southern Chinese population, and compared the  
5 predictive effects of LAP and other obesity indicators on hypertension risk. Moreover,  
6 this study investigated the interactive effects of LAP and family history of  
7 hypertension.

8 **Methods:** A total number of 2079 of community-dwelling adults in Southern China  
9 were enrolled in this cross-sectional study. The participants underwent questionnaire  
10 surveys, anthropometric tests, and laboratory examinations. The multivariate logistic  
11 regression model and receiver operating characteristic (ROC) curves, including LAP,  
12 body mass index (BMI), waist-hip ratio (WHR), WC, and TG were used to assess the  
13 association between hypertension risk and obesity indexes. The interaction effects  
14 were evaluated by relative excess risk of interaction (RERI), attributable proportion  
15 due to interaction (AP), and synergy index (SI).

16 **Results:** Higher LAP levels have a relatively higher risk of having hypertension in  
17 both sexes (males: adjusted odds ratio [OR] = 2.79 per SD increase, 95% confidence  
18 interval [CI] = 1.43–5.44,  $P < 0.001$ ; females: adjusted OR: 3.15, 95% CI = 1.56–6.39,  $P$   
19  $< 0.001$ ). LAP (area under curve [AUC] = 0.721; 95% CI: 0.680–0.761) is a better  
20 indicator in identifying hypertension risk than BMI, WHR, and TG in females, but  
21 WC performed better in males. A significant interaction between LAP and family  
22 history of hypertension was observed in males (RERI = 1.652, 95% CI: 0.267–3.037;  
23 AP = 0.516, 95% CI: 0.238–0.794; SI = 3.998, 95% CI: 0.897–17.820), but there is no  
24 statistically significant differences in females.

25 **Conclusions:** LAP significantly associated with hypertension risk in the Southern  
26 Chinese population. It has better performance than BMI, WHR, and TG on predicting  
27 hypertension risk of the Southern Chinese female population. This demonstrated the  
28 synergistic effect between LAP and family history of hypertension.

1  
2  
3  
4  
5  
6  
7  
8  
9  
10  
11  
12  
13  
14  
15  
16  
17  
18  
19  
20  
21  
22  
23  
24  
25  
26  
27  
28  
29  
30  
31  
32  
33  
34  
35  
36  
37  
38  
39  
40  
41  
42  
43  
44  
45  
46  
47  
48  
49  
50  
51  
52  
53  
54  
55  
56  
57  
58  
59  
60

1    **Keywords: Hypertension, LAP, Family history, Interaction effect**

2    **Strengths and limitations of this study**

3    **Strengths:**

4    1. Our study is the first to examine the validity of LAP, which was calculated using a  
5    modified formula, in the Southern China population.

6    **Limitations:**

- 7    1. This is a cross-sectional study; the results are not sufficient to indicate causality.
- 8    2. The population of our study can partially represent the general population in the  
9    Southern China but cannot fully represent this region.
- 10    3. Lack of the adjustment for renal function, and other risk factors for hypertension  
11    (such as serum uric acid) in our study.
- 12    4. This study has small sample size, so further studies with a larger sample size are  
13    needed to investigate whether the modified LAP applies to all the residents dwelling  
14    in Southern China.

## INTRODUCTION

Hypertension, a significant risk factor of cardiovascular disease,<sup>1</sup> is one of the most prevalent public health problems in the world and is the leading contributor to the global burden of disease and mortality. Nowadays, the number of adults with hypertension in the world is being predicted to increase by about 60% to a total of 1.56 billion in 2025, and one-third of adults are suffering from hypertension in China.<sup>2, 3</sup>

Obesity, especially visceral fat, and family history of hypertension contributes to hypertension significantly.<sup>4-6</sup> Numerous studies agree on the idea that people with hypertension's family history have higher chance to get hypertension.<sup>6-9</sup> Usually, when it comes to obesity, the indexes that are most frequently used to assess obesity are body mass index (BMI), waist circumference (WC), and waist-hip ratio (WHR); however, these traditional obesity indexes merely reflect the degrees of overweight and abdominal obesity, also, cannot distinguish the difference between subcutaneous fat and visceral fat.<sup>10</sup> Micromagnetic resonance imaging and microcomputed tomography, which are the visceral fat golden standard measurement methods, is inconvenient and expensive.<sup>11</sup> Moreover, they are not suitable for large-scale epidemiological investigations. Therefore, it is necessary to discover a new obesity indicator that can predict visceral fat from subcutaneous fat more conveniently and economically.

Recently, increasing attention has been directed towards lipid accumulation product (LAP). LAP, a new obesity index computed from WC and triglyceride (TG), is a useful indicator of visceral fat,<sup>12</sup> as demonstrated by Kahn in 2005<sup>13</sup>. Some studies suggest that LAP can also be used to identify metabolic syndromes,<sup>14, 15</sup> type 2 diabetes mellitus,<sup>16</sup> stroke,<sup>17</sup> and arterial stiffness.<sup>18</sup> Additionally, several cross-sectional studies conducted in Japan,<sup>19</sup> India,<sup>14</sup> and Brazil indicate that LAP significantly associated with cardiovascular disease and is a better indicator than BMI for identifying cardiovascular risk.<sup>13, 20</sup> A few national studies have investigated the association between LAP and hypertension in China, and all of them were conducted

1  
2  
3  
4  
5  
6  
7  
8  
9  
10  
11  
12  
13  
14  
15  
16  
17  
18  
19  
20  
21  
22  
23  
24  
25  
26  
27  
28  
29  
30  
31  
32  
33  
34  
35  
36  
37  
38  
39  
40  
41  
42  
43  
44  
45  
46  
47  
48  
49  
50  
51  
52  
53  
54  
55  
56  
57  
58  
59  
60

in northern China, including Bengbu,<sup>21</sup> Beijing,<sup>22</sup> and Inner Mongolia.<sup>23</sup> With a vast territory, China has a tremendous difference between South and North. Due to the geographical environment and dietary habits that have formed throughout its long history, there are some dietary and cultural differences between Northern and Southern China.<sup>24</sup> The Northern region shows a high intake of wheat, tubers, and liquor, etc. While southerner has a high intake of rice, vegetables, meat, poultry, fish etc.<sup>24</sup> The Carbohydrate-rich pattern of the northern region is associated with a high risk of hypertriglyceridemia and higher BMI. Meanwhile, significant differences are found in systolic blood pressure (SBP)/diastolic blood pressure (DBP) between southern Chinese and northern Chinese owing to different climate and dietary habits between southern and northern.<sup>25</sup> Studies have found that the northerners were heavier and had higher triglycerides level than southerners.<sup>26, 27</sup> Differences in dietary habits, or lifestyle, individuals from different regions should lead to different LAP. LAP has a different situation in the north and south. Thus, the applicability of LAP in predicting hypertension in Southern China is worth studying. However, rare studies have compared LAP with other obesity indexes in the Southern Chinese population. Besides, almost all studies about LAP used the formula that was developed based on the third National Health and Nutrition Examination Survey in the US. Therefore, it is reasonable to suggest that the calculation formula of LAP needs to be modified in the Chinese population.

To the best of our knowledge, no studies have attempted to adjust the calculation formula of LAP so that it can apply to the Southern Chinese population, and rare studies have explored additive interactions between family history of hypertension and LAP. Thus, the primary purpose of this study was to investigate the applicability of LAP in the Southern Chinese population and compare the predictive effects of LAP and other obesity indicators on hypertension risk. And the secondary purpose of the study was to assess interactive effects between LAP and family history of hypertension to predict the hypertension risk in the Southern Chinese population.

**METHODS**

## 1 Study design and subjects

2 A cross-sectional survey based on community health was conducted in the Foshan  
3 city of Guangdong province in Southern China. Recruiting the enrollers took place on  
4 March 2017. The study samples were selected by a multistage and stratified random  
5 sampling method. The stratification according to the economic levels and randomly  
6 selected street communities at economic levels, then randomly selected communities  
7 in street communities according to proportion. Communities residents were then  
8 randomly selected from the household lists. A total of 3760 individuals were enrolled  
9 in this study; among them, 1681 participants who lacked complete data on  
10 demographic characteristics, anthropometric tests, or laboratory examinations were  
11 excluded. There are no statistically significant differences in age and sex between  
12 excluded participants and included participants. Finally, 2079 adults who had  
13 complete data were included in the analysis.

## 14 Patient and public involvement

15 Patients or public were not involved in this study.

## 16 Ethics statement

17 This study was approved by the Ethics Committee of Guangzhou Medical University.  
18 Written informed consent was obtained from each study participant before  
19 investigation.

## 20 General study questionnaire

21 An interview-based survey was performed using a questionnaire by trained staff.  
22 Socio-demographic data, family history of hypertension, cigarette smoking, and  
23 alcohol drinking were investigated. Smokers were defined as the participants smoking  
24 at least 1 cigarette/day for at least 6 months. Drinkers were defined as individuals  
25 consuming at least 30 ml alcohol/week for 1 year or more. Physical activities were  
26 divided into “insufficiently active” and “sufficiently active.” Participants with  
27 “insufficiently active” were defined as those who performed activity less than  
28 150min/week. Participants with “sufficiently active” were defined as those who

1  
2  
3  
4  
5  
6  
7  
8  
9  
10  
11  
12  
13  
14  
15  
16  
17  
18  
19  
20  
21  
22  
23  
24  
25  
26  
27  
28  
29  
30  
31  
32  
33  
34  
35  
36  
37  
38  
39  
40  
41  
42  
43  
44  
45  
46  
47  
48  
49  
50  
51  
52  
53  
54  
55  
56  
57  
58  
59  
60

exercised more than 150min/week.<sup>28</sup> Marital status was classified as “currently not married” and “currently married”; “married” was regarded as “currently married,” and “divorced/widowed/single” was regarded as “currently not married.” Educational level was categorized as “elementary school or lower,” “secondary school,” and “senior high school or higher.”

**Anthropometric tests and laboratory examinations**

The participants were required to take off their shoes and wear lightweight clothing for weight and height measurements. WC was measured at the level of 1 cm above the navel.<sup>29</sup> Automatic sphygmomanometer (OMRON, hem-7125) was used to measure blood pressure (BP) of participants. BP measurement was conducted thrice in a quiet environment, and the participants rested at least one minute between each time of measurement. The mean of the three measurements was used in the analysis. Prehypertension was defined as SBP of 120–139 mmHg and/or DBP of 80–89 mmHg, and hypertension was defined as SBP of  $\geq 140$  mmHg, DBP of  $\geq 90$  mmHg, and/or a reported medical history of anti-hypertensive medication.<sup>29</sup> The BMI was calculated as weight in kilograms divided by the square of the height in meters. Overweight was defined as BMI of 24–27.9 kg/m<sup>2</sup>, and obesity was defined as BMI of  $\geq 28$  kg/m<sup>2</sup>. The fasting blood samples were collected from the participants in the morning after an overnight fast and were used to assess fasting plasma glucose, total cholesterol, and TG levels.

According to Kahn’s theory,<sup>13</sup> LAP is calculated as [WC (cm) - The minimum of WC (male)]  $\times$  [TG (mmol/L)] for males and [WC (cm) - The minimum of WC (female)]  $\times$  [TG (mmol/L)] for females, and the minimum waist size theoretically contains only the abdomen, muscle, viscera, and vertebral bone.<sup>13</sup> Visceral fat can be estimated by the difference between the WC and the minimum waist size. In the present study, the WC of the studied population was skewed; therefore, the WC was log-transformed. The minimum WC was estimated by the mean WC minus two standard deviations after log-transformation in the local participants aged 18–24 years.<sup>13, 22</sup>

## Statistical analyses

According to the hypertension status, the enrollees were divided into three groups (normotension, prehypertension, and hypertension). The frequency (%) was used to describe sex, marital status, education level, physical activity, BMI, smoker, and drinker. Mean  $\pm$  standard deviation (SDs) was used to describe the WC, WHR, fasting plasma glucose, total cholesterol, TG, SBP, DBP, and LAP. LAP was divided into four groups by the quartiles, i.e., Q1, Q2, Q3, and Q4. The differences of quantitative data across different hypertension statuses were analyzed by the Kruskal-Wallis H test because the data had skewed distribution. Categorical variables were analyzed by the Chi-squared test. The multivariate logistic regression model was used to analyze the relationship between LAP and risk factors of hypertension and prehypertension. The receiver operating characteristics (ROC) curves were applied to identify the superior obesity index and the best cut-off value of LAP to predict the hypertension risk. Moreover, the interaction effects between LAP and family history of hypertension were assessed by some relevant indicators, including the relative excess risk of interaction ( $RERI = OR_{11} - OR_{10} - OR_{01} + 1$ ), the attributable proportion due to interaction ( $AP = [OR_{11} - OR_{10} - OR_{01} + 1]/OR_{11}$ ), and the synergy index ( $SI = [OR_{11} - 1]/[OR_{01} - 1] + [OR_{10} - 1]$ ). If the interaction effect was not observed, the confidence interval of RERI and AP contained 0 and the confidence interval of S included 1.<sup>30</sup> The above indicators were calculated using an Excel table designed by Andersson et al.<sup>30</sup> All reported *P*-values were two-tailed, and a *P*-value of  $< 0.05$  was considered significant. Statistical analyses were performed using SPSS version 19.0 (SPSS Inc., Chicago, IL, USA).

## RESULTS

### LAP

According to Kahn's theory,<sup>13</sup> LAP was calculated as  $(WC - 60.6) \times (TG \text{ [mmol/L]})$  in males and  $(WC - 54.1) \times (TG \text{ [mmol/L]})$  in females based on the actual data obtained from the Southern Chinese population.<sup>22</sup>

**Basic characteristics of the study participants**

A total number of 2079 of adults with an average age of 41.06 years were enrolled in the present study, including 1002 males (48.29%) and 1077 females (51.80%). The overall prevalence rates of normotension, prehypertension, and hypertension were 40.02%, 37.95%, and 22.03%, respectively. Male participants had a high prevalence of prehypertension and hypertension than female participants ( $P < 0.001$ ). Statistically significant differences in age ( $P < 0.001$ ), marital status ( $P < 0.001$ ), education level ( $P < 0.001$ ), smoker ( $P < 0.001$ ), drinker ( $P < 0.001$ ), and family history of hypertension ( $P = 0.005$ ) were observed between normotension, prehypertension, and hypertension groups. However, no significant differences were observed in physical activity ( $P = 0.550$ ) among the three groups. Anthropometric measurements found significant differences in BMI ( $P < 0.001$ ), WC ( $P < 0.001$ ), WHR ( $P < 0.001$ ), LAP ( $P < 0.001$ ) between the groups. Statistically significant differences found in laboratory examinations including fasting plasma glucose ( $P < 0.001$ ), total cholesterol ( $P < 0.001$ ), SBP ( $P < 0.001$ ), and DBP ( $P < 0.001$ ) between the groups (Table 1). And the basic characteristics of different sex of study participants were shown in table 2.

**LAP and the risk factors of hypertension**

In order to investigate the relationship between LAP and blood pressure, LAP was divided into four groups by quartile in different sex (Table 3). A significant association was observed between LAP and blood pressure in both male and female. The results in males and females showed that SBP ( $P < 0.001$ ) and DBP ( $P < 0.001$ ) were relatively elevated in participants with higher LAP levels.

Multinomial logistic regression analysis was conducted to evaluate the association between LAP quartiles and hypertension status (Table 4). Participants with the third and the fourth quartile of LAP were more likely to develop prehypertension and hypertension than those with the first quartile in both males and females.

After adjusting for age, marital status, and educational level, the risks of

prehypertension (adjusted OR: 3.14, 95% CI: 1.95–5.07) and hypertension (adjusted OR: 9.02; 95% CI: 5.11–15.93) significantly increased in male participants with the fourth quartile compared with those with the first quartile. For females, increasing risks of prehypertension (adjusted OR: 3.26, 95% CI: 2.09–5.10) and hypertension (adjusted OR: 6.32; 95% CI: 3.42–11.65) were observed in participants with the fourth LAP quartile compared with those with the first one.

After controlling for age, marital status, educational level, physical activity, smoking, alcohol consumption, BMI, WHR, fasting plasma glucose, and family history of hypertension, the risks of prehypertension (adjusted OR: 1.67, 95% CI: 0.96–2.92) and hypertension (adjusted OR: 2.79, 95% CI: 1.43–5.44) significantly increased in male participants with the fourth quartile compared with those with the first quartile. Meanwhile, increasing risks of prehypertension (adjusted OR: 2.10, 95% CI: 1.26–3.51) and hypertension (adjusted OR: 3.15, 95% CI: 1.56–6.39) were observed in female participants with the fourth LAP quartile compared with those with the first one.

The results of ROC curves analysis in males and females were shown in Figure. 1 and 2 and Table 5. LAP (AUC = 0.721; 95% CI: 0.680–0.761) was a better indicator to predict different types of hypertension than BMI (AUC = 0.698; 95% CI: 0.658–0.737), WHR (AUC = 0.684; 95% CI: 0.643–0.726) and TG (AUC = 0.663; 95% CI: 0.620–0.706) in females; however, WC (AUC = 0.734 95% CI: 0.700–0.769) performed better than BMI (AUC = 0.707, 95% CI: 0.672–0.742), WHR (AUC = 0.688; 95% CI: 0.650–0.725), LAP (AUC = 0.677; 95% CI: 0.640–0.713) and TG (AUC = 0.607; 95% CI: 0.568–0.646) on males. The best cut-off values of LAP to predict hypertension were 63.892 in males and 30.860 in females.

### **Interaction effects between LAP and family history of hypertension**

The interaction effects between LAP and family history of hypertension are presented in Table 6. Significant interaction effects between LAP and family history of hypertension were observed in males. The results of RERI (1.652; 95% CI: 0.267–3.037) and AP (0.516; 95% CI: 0.238–0.794) indicated a significant interaction

1  
2  
3  
4  
5  
6  
7  
8  
9  
10  
11  
12  
13  
14  
15  
16  
17  
18  
19  
20  
21  
22  
23  
24  
25  
26  
27  
28  
29  
30  
31  
32  
33  
34  
35  
36  
37  
38  
39  
40  
41  
42  
43  
44  
45  
46  
47  
48  
49  
50  
51  
52  
53  
54  
55  
56  
57  
58  
59  
60

1 effect of family history of hypertension and LAP on hypertension, but the result of SI  
2 (3.998; 95% CI: 0.897–17.820) did not.

3 However, no statistically significant interaction effects were found between LAP  
4 and family history of hypertension in females, which is indicated by all the three  
5 indicators. RERI was - 0.673 (95% CI: -2.566–1.220); AP was -0.328 (95% CI:  
6 -1.451–0.795); and SI was 0.610 (95% CI: 0.125–2.979).

7 **Discussion**

8 With the rapid development of the economy and sedentary lifestyle, elevated blood  
9 pressure has become a common and serious public health issue.<sup>31</sup> The prevalence of  
10 prehypertension and hypertension significantly increased.<sup>32</sup> Elevated blood pressure is  
11 caused by diverse factors, among which obesity is closely related to hypertension.<sup>33</sup>  
12 The prevalence of obesity increased by 13% in urban areas and by 85% in rural areas  
13 in China, and more attention should thus be paid to this issue.<sup>17</sup> Extensive studies  
14 found that obesity, especially visceral adipose tissue, could strongly increase the  
15 blood pressure.<sup>33</sup>

16 The mechanisms underlying the interaction between obesity and hypertension are  
17 complicated. The mechanisms of obesity-induced hypertension include sodium  
18 retention, insulin resistance, activation of renin-angiotensin-aldosterone, altered  
19 vascular function, and secretion of relevant adipokines.<sup>34</sup> Besides, the mechanisms of  
20 blood pressure increase can be activated by visceral fat.<sup>35</sup>

21 Substantial evidence proved that the harm of the fat accumulation was greater than  
22 the total amount of fat.<sup>36, 37</sup> However, traditional obesity indexes, such as BMI, WC,  
23 and WHR, have limitations of distinguishing differences between subcutaneous fat  
24 and visceral fat. Therefore, a new obesity index that can predict visceral fat easily and  
25 effectively is urgently needed. After Kahn first demonstrated that LAP performs  
26 better than BMI for recognizing the cardiovascular risk, domestic and foreign scholars  
27 paid increasing attention to LAP. LAP, a combination of WC and TG, is an accessible  
28 and inexpensive way to assess visceral fat.<sup>13</sup> It is a well-known fact that TG reflect the

1 degree of visceral fat accumulation and WC strongly associated with hypertension.<sup>12</sup>  
2 Notably, hypertriglyceridemic waist (HTGW) is also calculated based on the  
3 combination of TG and WC. However, LAP, as a continuous indicator, is superior to  
4 reflect visceral fat than HTGW,<sup>38</sup> a discontinuous indicator.<sup>21</sup> Therefore, LAP was  
5 used as a visceral obesity indicator in this study.

6 LAP is based on the hypothesis of minimum waist circumference includes the  
7 rachis, abdominal viscera and muscle.<sup>13</sup> Therefore, the differences between the actual  
8 WC and the minimum WC can represent abdominal adipose tissue.<sup>13</sup> Notably, LAP in  
9 almost all studies is calculated by data obtained based on the third National Health  
10 and Nutrition Examination Survey in the United States.<sup>13</sup> Because of differences in  
11 race, dietary habits, or lifestyle, individuals from different countries should have  
12 different visceral adipose tissues. It demonstrated that there are considerable  
13 differences in visceral adipose tissues between Chinese individuals and Europeans or  
14 Americans.<sup>39</sup> Therefore, LAP was calculated in our study using a modified formula so  
15 that it could apply to the individuals dwelling in Southern China.

16 As expected, a significant association was found between LAP and hypertension in  
17 the present study. Our findings are consistent with those in studies by Zhong et al,<sup>17</sup>  
18 Song et al,<sup>37</sup> and Shen et al,<sup>22</sup> all of which have demonstrated that LAP is an effective  
19 and reliable diagnostic indicator of hypertension. Participants with significantly  
20 higher LAP had higher risks of prehypertension and hypertension than those with  
21 lower LAP. Multinomial logistic regression analysis revealed that after adjusting for  
22 other factors, the risks of prehypertension and hypertension in the group with the  
23 highest LAP level were 2.10 and 3.15 times higher in females, respectively, than  
24 those in the group with the lowest LAP.

25 Wang et al. found LAP is a better index to predict the risk of hypertension.<sup>40</sup>  
26 However, Gao et al found that the performance of LAP was superior to that of BMI in  
27 male Mongolians;<sup>23</sup> this findings may be due to the apparently lower prevalence of  
28 high TG in female Mongolians than in male Mongolians (13.20% vs 23.10%,  $P <$   
29 0.05), and the facts might disturb the association between LAP and hypertension in

1  
2  
3  
4  
5  
6  
7  
8  
9  
10  
11  
12  
13  
14  
15  
16  
17  
18  
19  
20  
21  
22  
23  
24  
25  
26  
27  
28  
29  
30  
31  
32  
33  
34  
35  
36  
37  
38  
39  
40  
41  
42  
43  
44  
45  
46  
47  
48  
49  
50  
51  
52  
53  
54  
55  
56  
57  
58  
59  
60

1 female Mongolians. Several studies found the superiority of LAP over BMI for  
2 detection of hypertension and prehypertension in both genders.<sup>21, 37, 40</sup> However, in the  
3 present study, we also found that LAP perform better than BMI in female. According  
4 to Kahn,<sup>41</sup> the annual LAP changes were reduced at older age in male. Advancing age  
5 is associated with a progressive increase in systolic BP levels and with development  
6 and progression of arterial hypertension because of a number of factors, including  
7 atherosclerotic changes, large artery stiffening, altered renal function, and arterial  
8 baroreflex impairment.<sup>42</sup> That is to say, increase in blood pressure was thought to be an  
9 unavoidable consequence of aging. Thus, the superiority of LAP for predicting  
10 hypertension in male may be disturbed by the larger-scale proportion of elder man  
11 (23.7%) in our study. In our study, LAP perform better in predicting the hypertension  
12 risk than TG in both sex. However, due to low predictive value of TG in southern  
13 China, LAP which combines of TG and WC is slightly inferior to WC.

14 In general, LAP, which applied to the Southern Chinese population, was a better  
15 indicator for predicting the hypertension risk in females in this study. In addition,  
16 large studies have demonstrated that family history of hypertension is a critical risk  
17 factor for hypertension, and individuals with family history of hypertension are 2–4  
18 times more likely to develop hypertension than those without the family history of  
19 hypertension.<sup>43</sup> The interaction analysis in this study indicates the synergistic effect of  
20 LAP and family history on the hypertension risk in males, but no statistically  
21 significant differences in the interaction effect in females. In fact, cardiovascular  
22 events occur at a lower rate in females than in males.<sup>44</sup> In our study, the female  
23 participants who had both LAP and family history of hypertension were rarely  
24 observed and the prevalence rates of hypertension at a lower rate in females than in  
25 males no matter premenopausal status or menopausal status.<sup>45</sup> Our study suffers from  
26 a small sample size, especially in females. The fewer positive female observers which  
27 had higher LAP and family history of hypertension lead to no statistically significant  
28 differences in the interaction effect on the hypertension risk in females. The  
29 interaction in female was not statistically significant, but their synergistic effect was

obvious. The synergistic effect between family history of hypertension and LAP on the hypertension risk was demonstrated in our study as well as in other studies.<sup>21, 40</sup> Visceral obesity and family history of hypertension may result in increased blood pressure through some unknown mechanisms. However, further studies are needed to investigate the interaction effect between LAP and family history of hypertension on the hypertension risk.

To date, LAP is an inexpensive screening tool to identify visceral adipose tissue, and the method has high reproducibility. LAP, which was proposed by Kahn, was developed for the Western population. Thus this study explored the validity of LAP, which was calculated based on the Southern China population. The findings suggest LAP might perform better in predicting the hypertension risk than BMI, WHR and TG in Southern Chinese females.

This study has some limitations. First of all, because this is a cross-sectional study, the present results are not sufficient to indicate causality. Secondly, the population of our study can partially represent the general population in the Southern China, but can not fully represent this region. Furthermore, this article is lack of adjustment for renal function, and other risk factors for hypertension (such as serum uric acid). Finally, because of the small sample size in this study, further studies with a larger sample size are needed to investigate whether the modified LAP applies to all the residents dwelling in Southern China.

## CONCLUSION

In conclusion, LAP significantly associated with the hypertension risk, and higher LAP levels had relatively higher blood pressure. LAP performed better in predicting hypertension of the Southern China female population than BMI, WHR, and TG did. This demonstrated the synergistic effect of LAP and family history of hypertension.

## Acknowledgements

We gratefully acknowledge Dr. Pei-Xi Wang, Dr. Jin-Xiang Ma, Xin-Yu Bao, Yi-Xian Xie, Xiao-Xia Zhang, Xin Peng, Yan Liu and Meng-Jiao Cheng for their excellent work in study coordination, data collection, and management.

**Contributors**

Jun-Xuan Huang, Pei-Xi Wang and Jin-Xiang Ma conceived and designed the study. Jun-Xuan Huang, Xin-Yu Bao, Yi-Xian Xie, Xiao-Xia Zhang, Xin Peng, Yan Liu and Meng-Jiao Cheng contributed to collection of the data, analyzed the data and interpretation of the results. Jun-Xuan Huang wrote the draft manuscript. Jin-Xiang Ma, Pei-Xi Wang and Jun-Xuan Huang finalized the manuscript with inputs from all authors. All of the authors approved the final version submitted for publication.

**Funding**

This study was supported by Talent Introduction Fund of Guangzhou Medical University (2009).

**Competing interests**

The authors declared that they had no conflict of interest.

**Ethics statement**

This study was approved by the Ethics Committee of Guangzhou Medical University. Written informed consent was obtained from each study participant before investigation.

**Data sharing statement**

Our data might not be shared directly, because it's our team work and the data belongs to our team. Thus consent should be attained from team members.

**References**

1. Kearney PM, Whelton M, Reynolds K, et al. Global burden of hypertension: analysis of worldwide data. *TheLancet* 2005;365(9455):217-223. doi:10.1016/S0140-6736(05)17741-1

2. Beaney T, Schutte AE, Tomaszewski M, et al. May Measurement Month 2017: an analysis of blood pressure screening results worldwide. *The Lancet Global Health* 2018;6(7):e736-e743. doi:10.1016/S2214-109X(18)30259-6

3. Bundy JD, He J. Hypertension and Related Cardiovascular Disease Burden in China. *Ann Glob Health* 2018;82(2):227-233. doi:10.1016/j.aogh.2016.02.002

- 1 4. Macia E, Gueye L, Duboz P. Hypertension and Obesity in Dakar, Senegal. *Plos*  
2 *One* 2016;11(9):e0161544. doi:10.1371/journal.pone.0161544
- 3 5. Tang L, Zhang F, Tong N. The association of visceral adipose tissue and  
4 subcutaneous adipose tissue with metabolic risk factors in a large population of  
5 Chinese adults. *Clin Endocrinol* 2016;85(1):46-53. doi:10.1111/cen.13013
- 6 6. Wandeler G, Paccaud F, Vollenweider P, et al. Strength of Family History in  
7 Predicting Levels of Blood Pressure, Plasma Glucose and Cholesterol. *Public*  
8 *Health Genom* 2010;13(3):143-154. doi:10.1159/000233228
- 9 7. Liu M, He Y, Jiang B, et al. Association Between Family History and  
10 Hypertension Among Chinese Elderly. *Medicine* 2015;94(48):e2226.  
11 doi:10.1097/MD.0000000000002226
- 12 8. Al-Safi SA, Aboul-Enein FH, Aboul-Enein BH, et al. Influence of family history  
13 and lifestyle on blood pressure and heart rate in young adults in Jordan. *Public*  
14 *Health* 2006;120(11):1027-1032. doi:10.1016/j.puhe.2006.06.009
- 15 9. Alhawari HH, Al-Shelleh S, Alhawari HH, et al. Blood Pressure and Its  
16 Association with Gender, Body Mass Index, Smoking, and Family History  
17 among University Students. *Int J Hypertens* 2018;2018:1-5.  
18 doi:10.1155/2018/4186496
- 19 10. Ibrahim MM. Subcutaneous and visceral adipose tissue: structural and functional  
20 differences. *Obes Rev* 2010;11(1):11-18. doi:10.1111/j.1467-789X.2009.00623.x
- 21 11. Chen W, Wilson JL, Khaksari M, et al. Abdominal fat analyzed by DEXA scan  
22 reflects visceral body fat and improves the phenotype description and the  
23 assessment of metabolic risk in mice. *Am J Physiol-Endoc M*  
24 2012;303(5):E635-E643. doi:10.1152/ajpendo.00078.2012
- 25 12. Nurdiantami Y, Watanabe K, Tanaka E, et al. Association of general and central  
26 obesity with hypertension. *Clin Nutr* 2018;37(4):1259-1263.  
27 doi:10.1016/j.clnu.2017.05.012
- 28 13. Kahn HS. The "lipid accumulation product" performs better than the body mass  
29 index for recognizing cardiovascular risk: a population-based comparison. *Bmc*  
30 *Cardiovasc Disor* 2005;5(1):26-26. doi:10.1186/1471-2261-5-26

1  
2  
3  
4  
5  
6  
7  
8  
9  
10  
11  
12  
13  
14  
15  
16  
17  
18  
19  
20  
21  
22  
23  
24  
25  
26  
27  
28  
29  
30  
31  
32  
33  
34  
35  
36  
37  
38  
39  
40  
41  
42  
43  
44  
45  
46  
47  
48  
49  
50  
51  
52  
53  
54  
55  
56  
57  
58  
59  
60

14. Ray L, Ravichandran K, Nanda SK. Comparison of Lipid Accumulation Product Index with Body Mass Index and Waist Circumference as a Predictor of Metabolic Syndrome in Indian Population. *Metab Syndr Relat D* 2018;16(5):240-245. doi:10.1089/met.2017.0119

15. Cicero A F G, Gitto S, Fogacci F, et al. Fatty liver index is associated to pulse wave velocity in healthy subjects: Data from the Brisighella Heart Study. *European Journal of Internal Medicine* 2018:S0953620518301262. doi:10.1097/01.hjr.0000136566.89429.63

16. Lee JW, Lim NK, Park HY. The product of fasting plasma glucose and triglycerides improves risk prediction of type 2 diabetes in middle-aged Koreans. *Bmc Endocr Disord* 2018;18(1):33. doi:10.1186/s12902-018-0259-x

17. Zhong C, Xia W, Zhong X, et al. Lipid Accumulation Product and Hypertension Related to Stroke: a 9.2-Year Prospective Study Among Mongolians in China. *J Atheroscler Thromb* 2016;23(7):830-838. doi:10.5551/jat.33514

18. Cicero A F G, D"Addato S, Reggi A, et al. Gender Difference in Hepatic Steatosis Index and Lipid Accumulation Product Ability to Predict Incident Metabolic Syndrome in the Historical Cohort of the Brisighella Heart Study. *Metabolic Syndrome and Related Disorders* 2013; 11(6):412-416.

19. Wakabayashi I. Associations of Blood Lipid-Related Indices with Blood Pressure and Pulse Pressure in Middle-Aged Men. *Metab Syndr Relat D* 2015;13(1):22-28. doi:10.1089/met.2014.0093

20. de Oliveira CC, Roriz AKC, Ramos LB, et al. Indicators of Adiposity Predictors of Metabolic Syndrome in the Elderly. *Ann Nutr Metab* 2017;70(1):9-15. doi:10.1159/000455333

21. Song J, Chen X, Zhao Y, et al. Risk factors for prehypertension and their interactive effect: a cross- sectional survey in China. *Bmc Cardiovasc Disor* 2018;18(1). doi:10.1186/s12872-018-0917-y

22. Shen YY, Chen JC, Li G, et al. Relationship of lipid accumulation product with hypertension and diabetes among Beijing residents study. *Zhonghua yu fang yi xue za zhi [Chinese journal of preventive medicine]* 2017;51(5):415.

23. Gao X, Wang G, Wang A, et al. Comparison of lipid accumulation product with body mass index as an indicator of hypertension risk among Mongolians in China. *Obes Res Clin Pract* 2013;7(4):e308-e314. doi:10.1016/j.orcp.2012.02.002
24. Song F , Cho M S . Geography of Food Consumption Patterns between South and North China. *Foods* 2017;6(5). doi:10.3390/foods6050034.
25. Huang Z , Wu X , Stamler J , et al. A north-south comparison of blood pressure and factors related to blood pressure in the People's Republic of China: a report from the PRC-USA Collaborative Study of Cardiovascular Epidemiology. *Journal of Hypertension* 1994; 12(9):1103-12.
26. Wu Z , Yao C , Zhao D , et al. Cardiovascular disease risk factor levels and their relations to CVD rates in China--results of Sino-MONICA project. *European Journal of Cardiovascular Prevention & Rehabilitation* 2004; 11(4):275-283.
27. Zhao L, Stamler J, Yan L L, et al. Blood Pressure Differences Between Northern and Southern Chinese: Role of Dietary Factors The International Study on Macronutrients and Blood Pressure. *Hypertension* 2004; 43(6):1332-1337.
28. Rosenberg DE, Bull FC, Marshall AL, Sallis JF, Bauman AE. Assessment of sedentary behavior with the international physical activity questionnaire. *J Phys Act Health*. 2008;5:S30-44.
29. Zhang M, Batu B, Tong W, et al. Prehypertension and Cardiovascular Risk Factor Clustering Among Mongolian Population in Rural and Animal Husbandry Area, Inner Mongolia, China. *Circ J* 2009;73(8):1437-1441. doi:10.1253/circj.CJ-09-0101
30. Andersson T, Alfredsson L, Källberg H, et al. Calculating measures of biological interaction. *Eur J Epidemiol* 2005;20(7):575-579. doi:10.1007/s10654-005-7835-x
31. Lackland DT, Beilin LJ, Campbell NRC, et al. Global Implications of Blood Pressure Thresholds and Targets. *Hypertension* 2018;71(6):985-987. doi:10.1161/HYPERTENSIONAHA.118.11280
32. Wang Z, Zeng X, Chen Z, et al. Association of visceral and total body fat with

1  
2  
3  
4  
5  
6  
7  
8  
9  
10  
11  
12  
13  
14  
15  
16  
17  
18  
19  
20  
21  
22  
23  
24  
25  
26  
27  
28  
29  
30  
31  
32  
33  
34  
35  
36  
37  
38  
39  
40  
41  
42  
43  
44  
45  
46  
47  
48  
49  
50  
51  
52  
53  
54  
55  
56  
57  
58  
59  
60

hypertension and prehypertension in a middle-aged Chinese population. *J Hypertens* 2015;33(8):1555-62. doi:10.1097/HJH.0000000000000602

33. Stabouli S, Papakatsika S, Kotsis V. The role of obesity, salt and exercise on blood pressure in children and adolescents. *Expert Rev Cardiovasc Ther* 2011;9(6):753-61. doi:10.1586/erc.11.63

34. Kotchen TA. Obesity-Related Hypertension: Epidemiology, Pathophysiology, and Clinical Management. *Am J Hypertens* 2010;23(11):1170-1178. doi:10.1038/ajh.2010.172

35. Boscaro M, Giacchetti G, Ronconi V. Visceral adipose tissue: emerging role of gluco- and mineralocorticoid hormones in the setting of cardiometabolic alterations: Adipose tissue and adrenal hormones. *Ann Ny Acad Sci* 2012;1264(1):87-102. doi:10.1111/j.1749-6632.2012.06597.x

36. Li Y, Bujo H, Takahashi K, et al. Visceral fat: higher responsiveness of fat mass and gene expression to calorie restriction than subcutaneous fat. *Exp Biol Med (Maywood)* 2003;228(10):1118-23.

37. Song J, Zhao Y, Nie S, et al. The effect of lipid accumulation product and its interaction with other factors on hypertension risk in Chinese Han population: A cross-sectional study. *Plos One* 2018;13(6):e0198105. doi:10.1371/journal.pone.0198105

38. Janghorbani M, Aminorroaya A, Amini M. Comparison of Different Obesity Indices for Predicting Incident Hypertension. *High Blood Pressure & Cardiovascular Prevention* 2017;24(2):157-166. doi:10.1007/s40292-017-0186-3

39. Nazare J, Smith JD, Borel A, et al. Ethnic influences on the relations between abdominal subcutaneous and visceral adiposity, liver fat, and cardiometabolic risk profile: the International Study of Prediction of Intra-Abdominal Adiposity and Its Relationship With Cardiometabolic Risk/Intra-Abdominal Adiposity. *The American Journal of Clinical Nutrition* 2012;96(4):714-726. doi:10.3945/ajcn.112.035758

40. Wang H, Chen Y, Sun G, et al. Validity of cardiometabolic index, lipid accumulation product, and body adiposity index in predicting the risk of

- hypertension in Chinese population. *Postgraduate Medicine* 2018;130(3):325-333.  
doi:10.1080/00325481.2018.1444901
41. Kahn H S, Cheng Y J. Longitudinal changes in BMI and in an index estimating excess lipids among white and black adults in the United States. *Int J Obes* 2008; 32(1):136-143.
42. Pinto E. Blood pressure and ageing. *Postgrad Med J* 2007; Feb;83(976):109-14.  
doi: 10.1136/pgmj.2006.048371
43. TOZAWA M, OSHIRO S, ISEKI C, et al. Family History of Hypertension and Blood Pressure in a Screened Cohort. *Hypertens Res* 2001;24(2):93-98.  
doi:10.1291/hypres.24.93
44. Doumas M, Papademetriou V, Faselis C, et al. Gender Differences in Hypertension: Myths and Reality. *Curr Hypertens Rep* 2013;15(4):321-330.  
doi:10.1007/s11906-013-0359-y
45. Ramezani TF, Behboudi-Gandevani S, Ghanbarian A, et al. Effect of menopause on cardiovascular disease and its risk factors: a 9-year follow-up study. *Climacteric*. 2014 Apr;17(2):164-72. doi: 10.3109/13697137.2013.828197.

## The titles and legends of figure

### Title

**Fig.1** The ROC curve of different obesity indexes in predicting hypertension in males.

### legend

LAP: lipid accumulation product; BMI: body mass index; WHR: waist-hip ratio; WC: waist circumference; TG: Triglyceride.

### Title

**Fig.2** The ROC curve of different obesity indexes in predicting hypertension in females.

### legend

LAP: lipid accumulation product; BMI: body mass index; WHR: waist-hip ratio; WC: waist circumference; TG: Triglyceride.

1     **Table 1** Basic characteristics of the participants

| Variables                     | Normotension<br>(N = 832) | Prehypertension<br>(N = 789) | Hypertension<br>(N = 458) | $\chi^2 / Z$ | P-value |
|-------------------------------|---------------------------|------------------------------|---------------------------|--------------|---------|
| Sex (%)                       |                           |                              |                           | 135.625      | < 0.001 |
| Male                          | 32.57                     | 58.68                        | 58.52                     |              |         |
| Female                        | 67.43                     | 41.32                        | 41.48                     |              |         |
| Age (years)                   | 36.42 ± 10.59             | 41.38 ± 12.71                | 48.93 ± 12.75             | 267.206      | < 0.001 |
| Marital status (%)            |                           |                              |                           | 21.287       | < 0.001 |
| Currently not married         | 23.20                     | 18.76                        | 12.66                     |              |         |
| Currently married             | 76.80                     | 81.24                        | 87.34                     |              |         |
| Education level (%)           |                           |                              |                           | 101.355      | < 0.001 |
| Elementary school and lower   | 15.87                     | 21.55                        | 36.46                     |              |         |
| Secondary school              | 36.30                     | 38.53                        | 39.96                     |              |         |
| Senior high school and higher | 47.83                     | 39.92                        | 23.58                     |              |         |
| Physical activity (%)         |                           |                              |                           | 2.688        | 0.611   |

|                 |       |       |       |         |         |
|-----------------|-------|-------|-------|---------|---------|
| Seldom or never | 35.70 | 34.22 | 31.22 |         |         |
| Moderate        | 17.43 | 18.25 | 18.78 |         |         |
| High            | 46.87 | 47.53 | 50.00 |         |         |
| Smoker (%)      |       |       |       | 50.346  | < 0.001 |
| Non-smoker      | 82.25 | 71.61 | 67.90 |         |         |
| Smoker          | 16.18 | 26.87 | 28.61 |         |         |
| Former smoker   | 0.97  | 1.52  | 3.49  |         |         |
| Drinker (%)     |       |       |       | 30.865  | < 0.001 |
| Non-drinker     | 84.11 | 76.34 | 72.53 |         |         |
| Drinker         | 14.91 | 22.39 | 24.62 |         |         |
| Former drinker  | 0.98  | 1.27  | 2.85  |         |         |
| BMI             |       |       |       | 255.012 | < 0.001 |
| < 18.5          | 13.70 | 5.20  | 2.18  |         |         |
| 18.5–23.9       | 68.51 | 54.88 | 41.70 |         |         |
| 24–27.9         | 14.30 | 31.69 | 37.55 |         |         |

|                                    |               |               |                |          |         |
|------------------------------------|---------------|---------------|----------------|----------|---------|
| ≥ 28                               | 3.49          | 8.24          | 18.56          |          |         |
| WC                                 | 75.61±8.19    | 81.61±9.04    | 87.02±9.95     | 411.441  | < 0.001 |
| WHR                                | 0.85± 0.06    | 0.88± 0.07    | 0.91± 0.06     | 248.475  | < 0.001 |
| Fasting plasma glucose (mmol/L)    | 4.69 ± 0.82   | 4.98 ± 1.33   | 5.31 ± 1.86    | 90.399   | < 0.001 |
| Total cholesterol (mmol/L)         | 4.70 ± 0.96   | 4.98 ± 1.07   | 5.26 ± 1.15    | 88.325   | < 0.001 |
| Triglyceride (mmol/L)              | 1.26 ± 0.83   | 1.77 ± 1.77   | 2.15 ± 2.25    | 178.995  | < 0.001 |
| Systolic blood pressure (mmHg)     | 107.97 ± 7.80 | 125.45 ± 6.65 | 144.78 ± 18.55 | 1533.137 | < 0.001 |
| Diastolic blood pressure (mmHg)    | 69.49 ± 6.40  | 79.59 ± 5.99  | 91.49 ± 11.33  | 1206.505 | < 0.001 |
| Family history of hypertension (%) |               |               |                | 18.391   | 0.005   |
| Only father                        | 11.42         | 11.03         | 11.14          |          |         |
| Only mother                        | 12.02         | 15.08         | 17.25          |          |         |
| Both parents                       | 5.41          | 4.82          | 8.95           |          |         |
| Neither                            | 71.15         | 69.07         | 62.66          |          |         |
| LAP                                | 29.14 ± 27.00 | 52.15 ± 63.50 | 75.87 ± 99.81  | 355.133  | < 0.001 |

1 BMI: body mass index; WC: waist circumference; WHR: waist-hip rate; LAP: lipid accumulation product.

1 **Table 2** Basic characteristics of the participants

| Male                          |                           |                              |                           |              |         | Female                    |                              |                           |              |         |
|-------------------------------|---------------------------|------------------------------|---------------------------|--------------|---------|---------------------------|------------------------------|---------------------------|--------------|---------|
| Variables                     | Normotension<br>(N = 271) | Prehypertension<br>(N = 463) | Hypertension<br>(N = 268) | $\chi^2 / Z$ | P-value | Normotension<br>(N = 561) | Prehypertension<br>(N = 326) | Hypertension<br>(N = 190) | $\chi^2 / Z$ | P-value |
| Age (years)                   | 36.57 ± 11.02             | 39.90 ± 12.37                | 47.15 ± 12.95             | 91.532       | < 0.001 | 36.35 ± 10.39             | 43.48 ± 12.92                | 51.43 ± 12.11             | 201.378      | < 0.001 |
| Marital status (%)            |                           |                              |                           | 26.019       | < 0.001 |                           |                              |                           | 7.928        | 0.019   |
| Currently not married         | 31.37                     | 22.46                        | 13.06                     |              |         | 19.25                     | 13.50                        | 12.11                     |              |         |
| Currently married             | 68.63                     | 77.54                        | 86.94                     |              |         | 80.75                     | 86.50                        | 87.89                     |              |         |
| Education level (%)           |                           |                              |                           | 24.179       | < 0.001 |                           |                              |                           | 116.258      | < 0.001 |
| Elementary school and lower   | 15.13                     | 15.33                        | 25.00                     |              |         | 16.22                     | 30.37                        | 52.63                     |              |         |
| Secondary school              | 37.64                     | 40.39                        | 45.15                     |              |         | 35.65                     | 35.89                        | 32.63                     |              |         |
| Senior high school and higher | 47.23                     | 44.28                        | 29.85                     |              |         | 48.13                     | 33.74                        | 14.74                     |              |         |
| Physical activity (%)         |                           |                              |                           | 0.807        | 0.668   |                           |                              |                           | 2.979        | 0.226   |
| insufficiently active         | 58.30                     | 56.16                        | 54.48                     |              |         | 50.62                     | 47.24                        | 43.68                     |              |         |

|    |                     |            |            |            |         |         |            |            |             |                 |
|----|---------------------|------------|------------|------------|---------|---------|------------|------------|-------------|-----------------|
| 1  |                     |            |            |            |         |         |            |            |             | 25              |
| 2  |                     |            |            |            |         |         |            |            |             |                 |
| 3  |                     |            |            |            |         |         |            |            |             |                 |
| 4  |                     |            |            |            |         |         |            |            |             |                 |
| 5  | sufficiently active | 41.70      | 43.84      | 45.52      |         | 49.38   | 52.76      | 56.32      |             |                 |
| 6  |                     |            |            |            |         |         |            |            |             |                 |
| 7  | Smoker (%)          |            |            |            | 7.037   | 0.132   |            |            | 5.893       | 0.122           |
| 8  |                     |            |            |            |         |         |            |            |             |                 |
| 9  | Non-smoker          | 47.78      | 52.27      | 46.27      |         | 99.82   | 99.08      | 99.42      |             |                 |
| 10 |                     |            |            |            |         |         |            |            |             |                 |
| 11 | Smoker              | 49.26      | 45.36      | 48.13      |         | 0.18    | 0.61       | 1.05       |             |                 |
| 12 |                     |            |            |            |         |         |            |            |             |                 |
| 13 | Former smoker       | 2.96       | 2.38       | 5.60       |         | 0.00    | 0.31       | 0.53       |             |                 |
| 14 |                     |            |            |            |         |         |            |            |             |                 |
| 15 | Drinker (%)         |            |            |            | 3.790   | 0.432   |            |            | 4.993       | 0.255           |
| 16 |                     |            |            |            |         |         |            |            |             |                 |
| 17 | Non-drinker         | 60.74      | 61.47      | 57.30      |         | 95.62   | 97.53      | 94.15      |             |                 |
| 18 |                     |            |            |            |         |         |            |            |             |                 |
| 19 | Drinker             | 36.67      | 36.36      | 38.20      |         | 4.20    | 2.47       | 5.32       |             |                 |
| 20 |                     |            |            |            |         |         |            |            |             |                 |
| 21 | Former drinker      | 2.59       | 2.16       | 4.49       |         | 0.18    | 0.00       | 0.53       |             |                 |
| 22 |                     |            |            |            |         |         |            |            |             |                 |
| 23 | BMI                 |            |            |            | 148.700 | < 0.001 |            |            | 99.205      | < 0.001         |
| 24 |                     |            |            |            |         |         |            |            |             |                 |
| 25 | < 18.5              | 16.61      | 4.54       | 1.49       |         | 12.30   | 6.13       | 3.16       |             |                 |
| 26 |                     |            |            |            |         |         |            |            |             |                 |
| 27 | 18.5–23.9           | 65.68      | 54.64      | 38.43      |         | 69.88   | 55.21      | 46.32      |             |                 |
| 28 |                     |            |            |            |         |         |            |            |             |                 |
| 29 | 24–27.9             | 14.39      | 33.26      | 39.18      |         | 14.26   | 29.45      | 35.26      |             |                 |
| 30 |                     |            |            |            |         |         |            |            |             |                 |
| 31 | ≥ 28                | 3.32       | 7.56       | 20.90      |         | 3.57    | 9.20       | 15.26      |             |                 |
| 32 |                     |            |            |            |         |         |            |            |             |                 |
| 33 | WC                  | 77.26±7.85 | 82.95±8.49 | 88.71±9.43 | 193.623 | < 0.001 | 74.82±8.24 | 79.72±9.46 | 84.63±10.20 | 154.819 < 0.001 |
| 34 |                     |            |            |            |         |         |            |            |             |                 |
| 35 |                     |            |            |            |         |         |            |            |             |                 |
| 36 |                     |            |            |            |         |         |            |            |             |                 |
| 37 |                     |            |            |            |         |         |            |            |             |                 |
| 38 |                     |            |            |            |         |         |            |            |             |                 |
| 39 |                     |            |            |            |         |         |            |            |             |                 |
| 40 |                     |            |            |            |         |         |            |            |             |                 |
| 41 |                     |            |            |            |         |         |            |            |             |                 |
| 42 |                     |            |            |            |         |         |            |            |             |                 |
| 43 |                     |            |            |            |         |         |            |            |             |                 |
| 44 |                     |            |            |            |         |         |            |            |             |                 |
| 45 |                     |            |            |            |         |         |            |            |             |                 |
| 46 |                     |            |            |            |         |         |            |            |             |                 |

|                                    |               |               |                |         |         |               |               |               |         |         |
|------------------------------------|---------------|---------------|----------------|---------|---------|---------------|---------------|---------------|---------|---------|
| WHR                                | 0.86±0.06     | 0.89±0.06     | 0.92±0.06      | 126.195 | < 0.001 | 0.84±0.07     | 0.86±0.07     | 0.89±0.06     | 183.524 | < 0.001 |
| Fasting plasma glucose (mmol/L)    | 4.76 ± 1.08   | 4.98 ± 1.38   | 5.30 ± 1.94    | 24.275  | < 0.001 | 4.65 ± 0.66   | 4.99 ± 1.26   | 5.31 ± 1.75   | 71.169  | < 0.001 |
| Total cholesterol (mmol/L)         | 4.73 ± 1.00   | 4.98 ± 1.06   | 5.17 ± 1.25    | 20.500  | < 0.001 | 4.69 ± 0.94   | 4.98 ± 1.08   | 5.39 ± 0.98   | 73.075  | < 0.001 |
| Triglyceride (mmol/L)              | 1.54 ± 1.08   | 1.93 ± 1.94   | 2.38 ± 2.68    | 40.974  | < 0.001 | 1.12 ± 0.64   | 1.54 ± 1.47   | 1.82 ± 1.40   | 90.583  | < 0.001 |
| Systolic blood pressure (mmHg)     | 110.52 ± 6.13 | 125.60 ± 6.54 | 145.64 ± 17.04 | 706.430 | < 0.001 | 106.73 ± 8.21 | 125.23 ± 6.81 | 143.57± 20.48 | 755.356 | < 0.001 |
| Diastolic blood pressure (mmHg)    | 70.82 ± 5.79  | 80.27 ± 5.75  | 93.11 ± 10.66  | 592.747 | < 0.001 | 68.84 ± 6.59  | 78.63 ± 6.19  | 89.20 ± 11.87 | 553.348 | < 0.001 |
| Family history of hypertension (%) |               |               |                | 16.427  | 0.012   |               |               |               | 6.847   | 0.335   |
| Only father                        | 10.70         | 11.23         | 13.81          |         |         | 11.76         | 10.74         | 7.37          |         |         |
| Only mother                        | 11.44         | 17.28         | 18.28          |         |         | 12.30         | 11.96         | 15.79         |         |         |
| Both parents                       | 6.27          | 4.75          | 9.70           |         |         | 4.99          | 4.91          | 7.89          |         |         |
| Neither                            | 71.59         | 66.74         | 58.21          |         |         | 70.94         | 72.39         | 68.95         |         |         |
| LAP                                | 38.69 ± 34.85 | 58.43 ± 65.52 | 87.83 ± 120.94 | 113.508 | < 0.001 | 24.52 ± 20.75 | 43.24 ± 59.48 | 58.98 ± 54.19 | 159.320 | < 0.001 |

BMI: body mass index; WC: waist circumference; WHR: waist-hip rate; LAP: lipid accumulation product.

**Table 3** Comparison of blood pressure among four quartiles of LAP

| Variables                       | LAP            |                |                |                | Z       | P-value |
|---------------------------------|----------------|----------------|----------------|----------------|---------|---------|
|                                 | Q1             | Q2             | Q3             | Q4             |         |         |
| Male                            |                |                |                |                |         |         |
| Systolic blood pressure (mmHg)  | 119.33 ± 13.72 | 125.61 ± 14.86 | 129.23 ± 16.38 | 133.36 ± 17.85 | 106.793 | < 0.001 |
| Diastolic blood pressure (mmHg) | 75.84 ± 9.89   | 80.55 ± 9.84   | 82.56 ± 10.74  | 85.64 ± 11.36  | 106.285 | < 0.001 |
| Female                          |                |                |                |                |         |         |
| Systolic blood pressure (mmHg)  | 110.45 ± 13.91 | 114.95 ± 15.07 | 119.66 ± 15.91 | 130.25 ± 19.78 | 184.926 | < 0.001 |
| Diastolic blood pressure (mmHg) | 71.05 ± 9.45   | 73.29 ± 9.60   | 76.21 ± 9.96   | 81.04 ± 11.70  | 134.730 | < 0.001 |

1

2 **Table 4** Multinomial logistic regression analysis of LAP associated with hypertension status

| Quartiles of LAP | OR <sup>a</sup> (95% CI) |                           | OR <sup>b</sup> (95% CI) |                          | OR <sup>c</sup> (95% CI) |                         |
|------------------|--------------------------|---------------------------|--------------------------|--------------------------|--------------------------|-------------------------|
|                  | prehypertension          | hypertension              | prehypertension          | hypertension             | prehypertension          | hypertension            |
| Male             |                          |                           |                          |                          |                          |                         |
| Q1               | 1 (reference)            | 1 (reference)             | 1 (reference)            | 1 (reference)            | 1 (reference)            | 1 (reference)           |
| Q2               | 2.98***<br>(1.88, 4.72)  | 4.70***<br>(2.34, 9.45)   | 2.22***<br>(1.48, 3.34)  | 2.38**<br>(1.36, 4.16)   | 1.73*<br>(1.12, 2.67)    | 1.61<br>(0.89, 2.94)    |
| Q3               | 4.48***<br>(2.85, 7.03)  | 8.26***<br>(4.21, 16.21)  | 2.68***<br>(1.74, 4.12)  | 3.90***<br>(2.24, 6.82)  | 1.66*<br>(1.03, 2.68)    | 1.75<br>(0.94, 3.26)    |
| Q4               | 4.65***<br>(2.93, 7.36)  | 17.82***<br>(9.21, 34.46) | 3.14***<br>(1.95, 5.07)  | 9.02***<br>(5.11, 15.93) | 1.67<br>(0.96, 2.92)     | 2.79***<br>(1.43, 5.44) |
| Female           |                          |                           |                          |                          |                          |                         |
| Q1               | 1 (reference)            | 1 (reference)             | 1 (reference)            | 1 (reference)            | 1 (reference)            | 1 (reference)           |
| Q2               | 1.75**<br>(1.22, 2.51)   | 2.19**<br>(1.27, 3.77)    | 1.046<br>(0.69,1.58)     | 1.19<br>(0.62,2.29)      | 0.91<br>(0.59,1.41)      | 1.015<br>(0.51,2.03)    |

|    |                         |                            |                        |                         |                       |                        |
|----|-------------------------|----------------------------|------------------------|-------------------------|-----------------------|------------------------|
| Q3 | 3.35***<br>(2.27, 4.93) | 6.50***<br>(3.83, 11.02)   | 1.68**<br>(1.11,2.52)  | 1.87<br>(0.99,3.49)     | 1.31<br>(0.84,2.05)   | 1.19<br>(0.60,2.38)    |
| Q4 | 5.99***<br>(3.74, 9.59) | 20.06***<br>(11.37, 35.38) | 3.26***<br>(2.09,5.10) | 6.32***<br>(3.42,11.65) | 2.10**<br>(1.26,3.51) | 3.15***<br>(1.56,6.39) |

OR=Odds ratio; CI=confidence interval; \*\*\*,  $P < 0.001$ ; \*\*,  $P < 0.01$ ; \*,  $P < 0.05$ .  
a, unadjusted.  
b, adjusted for age, sex, marital status, educational level  
c, adjusted for physical activity, smoker, drinker, BMI, WHR, fasting plasma glucose, family history of hypertension, and all the factors in b.

**Table 5** Predicting hypertension by different obesity indexes

| Variables | Cut-off value | Sensitivity (%) | Specificity (%) | Youden Index | AUC(95% CI)          | P-value |
|-----------|---------------|-----------------|-----------------|--------------|----------------------|---------|
| Male      |               |                 |                 |              |                      |         |
| BMI       | 23.004        | 73.51           | 58.08           | 0.316        | 0.707 (0.672, 0.742) | < 0.001 |
| WHR       | 0.906         | 58.58           | 70.27           | 0.289        | 0.688 (0.650, 0.725) | < 0.001 |
| LAP       | 63.892        | 49.63           | 76.99           | 0.266        | 0.677 (0.640, 0.713) | < 0.001 |

|               |        |       |       |       |                      |         |
|---------------|--------|-------|-------|-------|----------------------|---------|
| WC            | 85.05  | 65.67 | 72.60 | 0.383 | 0.734 (0.700, 0.769) | < 0.001 |
| TG            | 1.91   | 46.27 | 70.14 | 0.164 | 0.607 (0.568, 0.646) | < 0.001 |
| <b>Female</b> |        |       |       |       |                      |         |
| BMI           | 21.767 | 81.58 | 50.73 | 0.323 | 0.698 (0.658, 0.737) | < 0.001 |
| WHR           | 0.860  | 74.21 | 55.24 | 0.294 | 0.684 (0.643, 0.726) | < 0.001 |
| LAP           | 30.860 | 68.95 | 67.42 | 0.363 | 0.721 (0.680, 0.761) | < 0.001 |
| WC            | 79.90  | 72.11 | 64.94 | 0.370 | 0.725 (0.686, 0.766) | < 0.001 |
| TG            | 1.26   | 63.68 | 64.49 | 0.282 | 0.663 (0.620, 0.706) | < 0.001 |

1 BMI: body mass index; WHR: waist-hip rate; LAP: lipid accumulation product; WC: waist circumference; TG: Triglyceride; AUC: area under curve;  
 2 OR=Odds ratio; CI=confidence interval.

3  
 4 **Table 6** Interaction effects between LAP and family history of hypertension

| Variables        | Variables                   | N | OR <sup>c</sup> (95% CI) | Interaction indexes (95% CI) |
|------------------|-----------------------------|---|--------------------------|------------------------------|
| <b>Male</b>      |                             |   |                          |                              |
| LAP <sup>a</sup> | Family history <sup>b</sup> |   |                          |                              |

|                  |                             |     |                         |                               |
|------------------|-----------------------------|-----|-------------------------|-------------------------------|
| -                | -                           | 486 | 1 (reference)           | RERI = 1.652 (0.267, 3.037)*  |
| -                | +                           | 215 | 1.189 (0.772, 1.832)    | AP = 0.516 (0.238, 0.794)*    |
| +                | -                           | 173 | 1.362 (0.875, 2.121)    | SI = 3.998 (0.897, 17.820)    |
| +                | +                           | 128 | 3.203*** (2.002, 5.124) |                               |
| Female           |                             |     |                         |                               |
| LAP <sup>a</sup> | Family history <sup>b</sup> |     |                         |                               |
| -                | -                           | 657 | 1 (reference)           | RERI = -0.673 (-2.566, 1.220) |
| -                | +                           | 276 | 1.995** (1.284, 3.099)  | AP = -0.328 (-1.451, 0.795)   |
| +                | -                           | 108 | 1.729* (1.023, 2.922)   | SI = 0.610 (0.125, 2.979)     |
| +                | +                           | 36  | 2.051 (0.919, 4.589)    |                               |

LAP: lipid accumulation production; RERI: relative excess risk of interaction ; AP: attributable proportion due to interaction; SI: synergy index; OR=Odds ratio; CI=confidence interval; \*\*\*,  $P < 0.001$ ; \*\*,  $P < 0.01$ ; \*,  $P < 0.05$ .

<sup>a</sup>, grouped by the cut-off values in Table 4.

<sup>b</sup>, family history of hypertension was defined as one parent or both parents having hypertension.

<sup>c</sup>, adjusted for age, marital status, educational level, physical activity, smoker, drinker, BMI, and WHR.

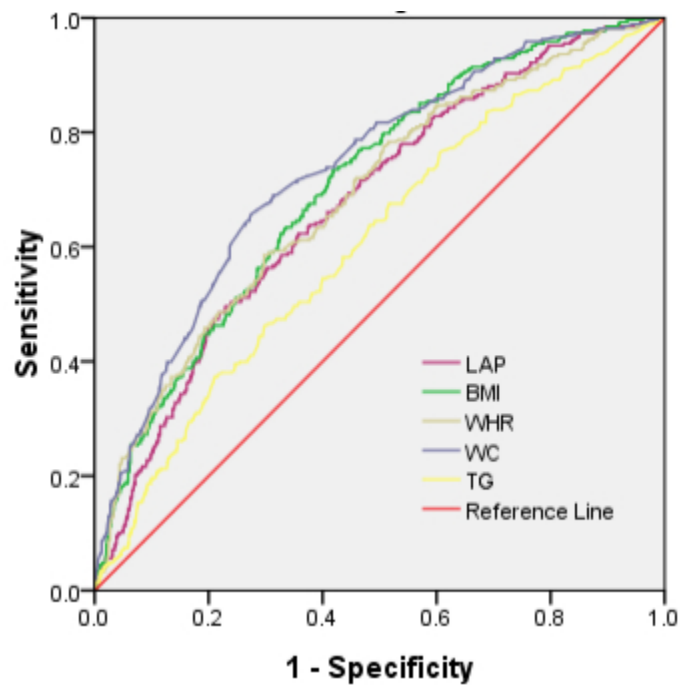

Fig.1 The ROC curve of different obesity indexes in predicting hypertension in males.

legend

LAP: lipid accumulation product; BMI: body mass index; WHR: waist-hip ratio; WC: waist circumference; TG: Triglyceride.

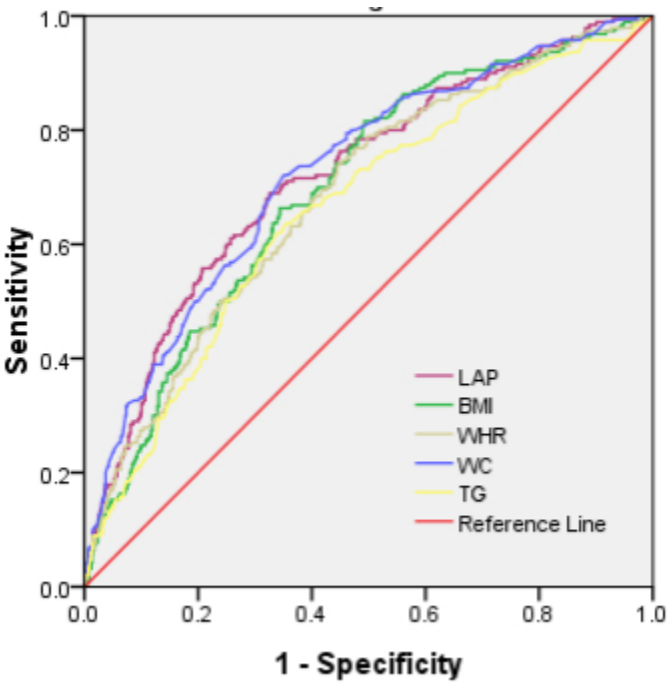

Fig.2 The ROC curve of different obesity indexes in predicting hypertension in females.  
legend  
LAP: lipid accumulation product; BMI: body mass index; WHR: waist-hip ratio; WC: waist circumference;  
TG: Triglyceride.

**STROBE 2007 (v4) Statement—Checklist of items that should be included in reports of *cross-sectional studies***

| Section/Topic             | Item # | Recommendation                                                                                                                                                                       | Reported on page # |
|---------------------------|--------|--------------------------------------------------------------------------------------------------------------------------------------------------------------------------------------|--------------------|
| Title and abstract        | 1      | (a) Indicate the study’s design with a commonly used term in the title or the abstract                                                                                               | Page 1             |
|                           |        | (b) Provide in the abstract an informative and balanced summary of what was done and what was found                                                                                  | Page 2             |
| Introduction              |        |                                                                                                                                                                                      |                    |
| Background/rationale      | 2      | Explain the scientific background and rationale for the investigation being reported                                                                                                 | Page 4-5           |
| Objectives                | 3      | State specific objectives, including any prespecified hypotheses                                                                                                                     | Page 5             |
| Methods                   |        |                                                                                                                                                                                      |                    |
| Study design              | 4      | Present key elements of study design early in the paper                                                                                                                              | Page 5             |
| Setting                   | 5      | Describe the setting, locations, and relevant dates, including periods of recruitment, exposure, follow-up, and data collection                                                      | Page 5             |
| Participants              | 6      | (a) Give the eligibility criteria, and the sources and methods of selection of participants                                                                                          | Page 5-6           |
| Variables                 | 7      | Clearly define all outcomes, exposures, predictors, potential confounders, and effect modifiers. Give diagnostic criteria, if applicable                                             | Page 6-7           |
| Data sources/ measurement | 8*     | For each variable of interest, give sources of data and details of methods of assessment (measurement). Describe comparability of assessment methods if there is more than one group | Page 6-7           |
| Bias                      | 9      | Describe any efforts to address potential sources of bias                                                                                                                            | Page 3             |

|                        |     |                                                                                                                                                                                                              |                                       |
|------------------------|-----|--------------------------------------------------------------------------------------------------------------------------------------------------------------------------------------------------------------|---------------------------------------|
| Study size             | 10  | Explain how the study size was arrived at                                                                                                                                                                    | Page 6                                |
| Quantitative variables | 11  | Explain how quantitative variables were handled in the analyses. If applicable, describe which groupings were chosen and why                                                                                 | Page 7-8                              |
| Statistical methods    | 12  | (a) Describe all statistical methods, including those used to control for confounding                                                                                                                        | Page 7-8                              |
|                        |     | (b) Describe any methods used to examine subgroups and interactions                                                                                                                                          | Page 7-8                              |
|                        |     | (c) Explain how missing data were addressed                                                                                                                                                                  | Page 5                                |
|                        |     | (d) If applicable, describe analytical methods taking account of sampling strategy                                                                                                                           | Page 5                                |
|                        |     | (e) Describe any sensitivity analyses                                                                                                                                                                        | Not applicable                        |
| Results                |     |                                                                                                                                                                                                              |                                       |
| Participants           | 13* | (a) Report numbers of individuals at each stage of study—eg numbers potentially eligible, examined for eligibility, confirmed eligible, included in the study, completing follow-up, and analysed            | Page 8-9; Table 1; Table 2            |
|                        |     | (b) Give reasons for non-participation at each stage                                                                                                                                                         | Not application                       |
|                        |     | (c) Consider use of a flow diagram                                                                                                                                                                           | Not application                       |
| Descriptive data       | 14* | (a) Give characteristics of study participants (eg demographic, clinical, social) and information on exposures and potential confounders                                                                     | Page 8-9; Table 1; Table 2            |
|                        |     | (b) Indicate number of participants with missing data for each variable of interest                                                                                                                          | Not application                       |
| Outcome data           | 15* | Report numbers of outcome events or summary measures                                                                                                                                                         | Page 8-9; Table 1                     |
| Main results           | 16  | (a) Give unadjusted estimates and, if applicable, confounder-adjusted estimates and their precision (eg, 95% confidence interval). Make clear which confounders were adjusted for and why they were included | Page 9-10; Table 4; Table 6           |
|                        |     | (b) Report category boundaries when continuous variables were categorized                                                                                                                                    | Page 6-8; Table 1; Table 2; Table 3 ; |

|                          |    |                                                                                                                                                                            |                     |
|--------------------------|----|----------------------------------------------------------------------------------------------------------------------------------------------------------------------------|---------------------|
|                          |    |                                                                                                                                                                            | Table 6             |
|                          |    | (c) If relevant, consider translating estimates of relative risk into absolute risk for a meaningful time period                                                           | Not application     |
| Other analyses           | 17 | Report other analyses done—eg analyses of subgroups and interactions, and sensitivity analyses                                                                             | Page 10-11; Table 6 |
| <b>Discussion</b>        |    |                                                                                                                                                                            |                     |
| Key results              | 18 | Summarise key results with reference to study objectives                                                                                                                   | Page 12-14          |
| Limitations              | 19 | Discuss limitations of the study, taking into account sources of potential bias or imprecision. Discuss both direction and magnitude of any potential bias                 | Page 14             |
| Interpretation           | 20 | Give a cautious overall interpretation of results considering objectives, limitations, multiplicity of analyses, results from similar studies, and other relevant evidence | Page 12-14          |
| Generalisability         | 21 | Discuss the generalisability (external validity) of the study results                                                                                                      | Page 13             |
| <b>Other information</b> |    |                                                                                                                                                                            |                     |
| Funding                  | 22 | Give the source of funding and the role of the funders for the present study and, if applicable, for the original study on which the present article is based              | Page 14-15          |

\*Give information separately for cases and controls in case-control studies and, if applicable, for exposed and unexposed groups in cohort and cross-sectional studies.

**Note:** An Explanation and Elaboration article discusses each checklist item and gives methodological background and published examples of transparent reporting. The STROBE checklist is best used in conjunction with this article (freely available on the Web sites of PLoS Medicine at <http://www.plosmedicine.org/>, Annals of Internal Medicine at <http://www.annals.org/>, and Epidemiology at <http://www.epidem.com/>). Information on the STROBE Initiative is available at [www.strobe-statement.org](http://www.strobe-statement.org).

# BMJ Open

## Interaction of lipid accumulation product and family history of hypertension on hypertension risk: A cross-sectional study in the Southern Chinese population

|                                 |                                                                                                                                                                                                                                                                                                                                                                                                                                                                 |
|---------------------------------|-----------------------------------------------------------------------------------------------------------------------------------------------------------------------------------------------------------------------------------------------------------------------------------------------------------------------------------------------------------------------------------------------------------------------------------------------------------------|
| Journal:                        | <i>BMJ Open</i>                                                                                                                                                                                                                                                                                                                                                                                                                                                 |
| Manuscript ID                   | bmjopen-2019-029253.R3                                                                                                                                                                                                                                                                                                                                                                                                                                          |
| Article Type:                   | Original research                                                                                                                                                                                                                                                                                                                                                                                                                                               |
| Date Submitted by the Author:   | 24-Oct-2019                                                                                                                                                                                                                                                                                                                                                                                                                                                     |
| Complete List of Authors:       | Huang, junxuan; Guangzhou Medical University<br>Bao, XinYu; Guangzhou Medical University<br>Xie, yixian; Guangzhou Medical University<br>Zhang, xiaoxia; Guangzhou Medical University<br>Peng, xin; Guangzhou Medical University<br>Liu, yan; Guangzhou Medical University<br>Cheng, mengjiao; Guangzhou Medical University<br>Ma, JinXiang; Guangzhou Medical University<br>wang, peixi; General Practice Center, Nanhai Hospital, Southern Medical University |
| <b>Primary Subject Heading</b>: | Public health                                                                                                                                                                                                                                                                                                                                                                                                                                                   |
| Secondary Subject Heading:      | Epidemiology, Diabetes and endocrinology                                                                                                                                                                                                                                                                                                                                                                                                                        |
| Keywords:                       | Hypertension < CARDIOLOGY, LAP, Family history, Interaction effect                                                                                                                                                                                                                                                                                                                                                                                              |
|                                 |                                                                                                                                                                                                                                                                                                                                                                                                                                                                 |

SCHOLARONE™  
Manuscripts

Jun-Xuan Huang<sup>1</sup>, Xin-Yu Bao<sup>1</sup>, Yi-Xian Xie<sup>1</sup>, Xiao-Xia Zhang<sup>1</sup>, Xin Peng<sup>1</sup>, Yan  
Liu<sup>1</sup>, Meng-Jiao Cheng<sup>1</sup>, Jin-Xiang Ma<sup>1\*</sup> and Pei-Xi Wang<sup>2\*</sup>

<sup>2</sup>General Practice Center, Nanhai Hospital, Southern Medical University, Foshan, 528244, China.

circle\_wong@yeah.net (J.-X.H.); 1027473041@qq.com (X.-Y.B.);  
yixian.xie@yahoo.com (Y.-X.X.); zhangxiaoxia405@163.com (X.-X.Z.);  
609167985@qq.com (X.P.); 1763136904@qq.com (Y.L.);  
15700727758@163.com (M.-J.C.); mjx777108@hotmail.com (J.-X.M);  
peixi001@163.com (P.-X.W.)

mjx777108@hotmail.com, peixi001@163.com

## ABSTRACT

**Objectives:** This study aimed at investigating the applicability of a novel index based on waist circumference (WC) and Triglyceride (TG) which was named lipid accumulation product (LAP) in the Southern Chinese population, and compared the predictive effects of LAP and other obesity indicators on hypertension risk. Moreover, this study investigated the interactive effects of LAP and family history of hypertension.

**Methods:** A total number of 2079 of community-dwelling adults in Southern China were enrolled in this cross-sectional study. The participants underwent questionnaire surveys, anthropometric tests, and laboratory examinations. The multivariate logistic regression model and receiver operating characteristic (ROC) curves, including LAP, body mass index (BMI), waist-hip ratio (WHR), WC, and TG were used to assess the association between hypertension risk and obesity indexes. The interaction effects were evaluated by relative excess risk of interaction (RERI), attributable proportion due to interaction (AP), and synergy index (SI).

**Results:** Higher LAP levels have a relatively higher risk of having hypertension in both sexes (males: adjusted odds ratio [OR] = 2.79 per SD increase, 95% confidence interval [CI] = 1.43-5.44,  $P < 0.001$ ; females: adjusted OR: 3.15, 95% CI = 1.56-6.39,  $P < 0.001$ ). LAP (area under curve [AUC] = 0.721; 95% CI: 0.680-0.761) is a better indicator in identifying hypertension risk than BMI, WHR, and TG in females, but WC performed better in males. A significant interaction between LAP and family history of hypertension was observed in males (RERI = 1.652, 95% CI: 0.267-3.037; AP = 0.516, 95% CI: 0.238-0.794; SI = 3.998, 95% CI: 0.897-17.820), but there is no statistically significant differences in females.

**Conclusions:** LAP significantly associated with hypertension risk in the Southern Chinese population. It has better performance than BMI, WHR, and TG on predicting hypertension risk of the Southern Chinese female population. Moreover, LAP and family history of hypertension might synergistically increase the risk of hypertension.

1  
2  
3  
4  
5  
6  
7  
8  
9  
10  
11  
12  
13  
14  
15  
16  
17  
18  
19  
20  
21  
22  
23  
24  
25  
26  
27  
28  
29  
30  
31  
32  
33  
34  
35  
36  
37  
38  
39  
40  
41  
42  
43  
44  
45  
46  
47  
48  
49  
50  
51  
52  
53  
54  
55  
56  
57  
58  
59  
60

1    **Keywords: Hypertension, LAP, Family history, Interaction effect**

2    **Strengths and limitations of this study**

3    **Strengths:**

4    1. Our study is the first to examine the validity of LAP, which was calculated using a  
5    modified formula, in the Southern China population.

6    **Limitations:**

- 7    1. This is a cross-sectional study; the results are not sufficient to indicate causality.
- 8    2. The population of our study can partially represent the general population in the  
9    Southern China but cannot fully represent this region.
- 10    3. Lack of the adjustment for renal function, and other risk factors for hypertension  
11    (such as serum uric acid) in our study.
- 12    4. This study has small sample size, so further studies with a larger sample size are  
13    needed to investigate whether the modified LAP applies to all the residents dwelling  
14    in Southern China.

## INTRODUCTION

Hypertension, a significant risk factor of cardiovascular disease,<sup>1</sup> is one of the most prevalent public health problems in the world and is the leading contributor to the global burden of disease and mortality. Nowadays, the number of adults with hypertension in the world is being predicted to increase by about 60% to a total of 1.56 billion in 2025, and one-third of adults are suffering from hypertension in China.<sup>2, 3</sup>

Obesity, especially visceral fat, and family history of hypertension contributes to hypertension significantly.<sup>4-6</sup> Numerous studies agree on the idea that people with hypertension's family history have higher chance to get hypertension.<sup>6-9</sup> Usually, when it comes to obesity, the indexes that are most frequently used to assess obesity are body mass index (BMI), waist circumference (WC), and waist-hip ratio (WHR); however, these traditional obesity indexes merely reflect the degrees of overweight and abdominal obesity, also, cannot distinguish the difference between subcutaneous fat and visceral fat.<sup>10</sup> Micromagnetic resonance imaging and microcomputed tomography, which are the visceral fat golden standard measurement methods, is inconvenient and expensive.<sup>11</sup> Moreover, they are not suitable for large-scale epidemiological investigations. Therefore, it is necessary to discover a new obesity indicator that can predict visceral fat from subcutaneous fat more conveniently and economically.

Recently, increasing attention has been directed towards lipid accumulation product (LAP). LAP, a new obesity index computed from WC and triglyceride (TG), is a useful indicator of visceral fat,<sup>12</sup> as demonstrated by Kahn in 2005<sup>13</sup>. Some studies suggest that LAP can also be used to identify metabolic syndromes,<sup>14, 15</sup> type 2 diabetes mellitus,<sup>16</sup> stroke,<sup>17</sup> and arterial stiffness.<sup>18</sup> Additionally, several cross-sectional studies conducted in Japan,<sup>19</sup> India,<sup>14</sup> and Brazil indicate that LAP significantly associated with cardiovascular disease and is a better indicator than BMI for identifying cardiovascular risk.<sup>13, 20</sup> A few national studies have investigated the association between LAP and hypertension in China, and all of them were conducted

1  
2  
3  
4  
5  
6  
7  
8  
9  
10  
11  
12  
13  
14  
15  
16  
17  
18  
19  
20  
21  
22  
23  
24  
25  
26  
27  
28  
29  
30  
31  
32  
33  
34  
35  
36  
37  
38  
39  
40  
41  
42  
43  
44  
45  
46  
47  
48  
49  
50  
51  
52  
53  
54  
55  
56  
57  
58  
59  
60

in northern China, including Bengbu,<sup>21</sup> Beijing,<sup>22</sup> and Inner Mongolia.<sup>23</sup> With a vast territory, China has a tremendous difference between South and North. Due to the geographical environment and dietary habits that have formed throughout its long history, there are some dietary and cultural differences between Northern and Southern China.<sup>24</sup> The Northern region shows a high intake of wheat, tubers, and liquor, etc. While southerner has a high intake of rice, vegetables, meat, poultry, fish etc.<sup>24</sup> The Carbohydrate-rich pattern of the northern region is associated with a high risk of hypertriglyceridemia and higher BMI. Meanwhile, significant differences are found in systolic blood pressure (SBP)/diastolic blood pressure (DBP) between southern Chinese and northern Chinese owing to different climate and dietary habits between southern and northern.<sup>25</sup> Studies have found that the northerners were heavier and had higher triglycerides level than southerners.<sup>26, 27</sup> Differences in dietary habits, or lifestyle, individuals from different regions should lead to different LAP. LAP has a different situation in the north and south. Thus, the applicability of LAP in predicting hypertension in Southern China is worth studying. However, rare studies have compared LAP with other obesity indexes in the Southern Chinese population. Besides, almost all studies about LAP used the formula that was developed based on the third National Health and Nutrition Examination Survey in the US. Therefore, it is reasonable to suggest that the calculation formula of LAP needs to be modified in the Chinese population.

To the best of our knowledge, no studies have attempted to adjust the calculation formula of LAP so that it can apply to the Southern Chinese population, and rare studies have explored additive interactions between family history of hypertension and LAP. Thus, the primary purpose of this study was to investigate the applicability of LAP in the Southern Chinese population and compare the predictive effects of LAP and other obesity indicators on hypertension risk. And the secondary purpose of the study was to assess interactive effects between LAP and family history of hypertension to predict the hypertension risk in the Southern Chinese population.

**METHODS**

## **Study design and subjects**

A cross-sectional survey based on community health was conducted in the Foshan city of Guangdong province in Southern China. Recruiting the enrollers took place on March 2017. The study samples were selected by a multistage and stratified random sampling method. The stratification according to the economic levels and randomly selected street communities at economic levels, then randomly selected communities in street communities according to proportion. Communities residents were then randomly selected from the household lists. A total of 3760 individuals were enrolled in this study; among them, 1681 participants who lacked complete data on demographic characteristics, anthropometric tests, or laboratory examinations were excluded. There are no statistically significant differences in age and sex between excluded participants and included participants. Finally, 2079 adults who had complete data were included in the analysis.

## **Patient and public involvement**

Patients or public were not involved in this study.

## **Ethics statement**

This study was approved by the Ethics Committee of Guangzhou Medical University. Written informed consent was obtained from each study participant before investigation.

## **General study questionnaire**

An interview-based survey was performed using a questionnaire by trained staff. Socio-demographic data, family history of hypertension, cigarette smoking, and alcohol drinking were investigated. Smokers were defined as the participants smoking at least 1 cigarette/day for at least 6 months. Drinkers were defined as individuals consuming at least 30 ml alcohol/week for 1 year or more. Physical activities were divided into “insufficiently active” and “sufficiently active.” Participants with “insufficiently active” were defined as those who performed activity less than 150min/week. Participants with “sufficiently active” were defined as those who

1  
2  
3  
4  
5  
6  
7  
8  
9  
10  
11  
12  
13  
14  
15  
16  
17  
18  
19  
20  
21  
22  
23  
24  
25  
26  
27  
28  
29  
30  
31  
32  
33  
34  
35  
36  
37  
38  
39  
40  
41  
42  
43  
44  
45  
46  
47  
48  
49  
50  
51  
52  
53  
54  
55  
56  
57  
58  
59  
60

exercised more than 150min/week.<sup>28</sup> Marital status was classified as “currently not married” and “currently married”; “married” was regarded as “currently married,” and “divorced/widowed/single” was regarded as “currently not married.” Educational level was categorized as “elementary school or lower,” “secondary school,” and “senior high school or higher.”

**Anthropometric tests and laboratory examinations**

The participants were required to take off their shoes and wear lightweight clothing for weight and height measurements. WC was measured at the level of 1 cm above the navel.<sup>29</sup> Automatic sphygmomanometer (OMRON, hem-7125) was used to measure blood pressure (BP) of participants. BP measurement was conducted thrice in a quiet environment, and the participants rested at least one minute between each time of measurement. The mean of the three measurements was used in the analysis. Prehypertension was defined as SBP of 120–139 mmHg and/or DBP of 80–89 mmHg, and hypertension was defined as SBP of  $\geq 140$  mmHg, DBP of  $\geq 90$  mmHg, and/or a reported medical history of anti-hypertensive medication.<sup>29</sup> The BMI was calculated as weight in kilograms divided by the square of the height in meters. Overweight was defined as BMI of 24–27.9 kg/m<sup>2</sup>, and obesity was defined as BMI of  $\geq 28$  kg/m<sup>2</sup>. The fasting blood samples were collected from the participants in the morning after an overnight fast and were used to assess fasting plasma glucose, total cholesterol, and TG levels.

According to Kahn’s theory,<sup>13</sup> LAP is calculated as [WC (cm) - The minimum of WC (male)]  $\times$  [TG (mmol/L)] for males and [WC (cm) - The minimum of WC (female)]  $\times$  [TG (mmol/L)] for females, and the minimum waist size theoretically contains only the abdomen, muscle, viscera, and vertebral bone.<sup>13</sup> Visceral fat can be estimated by the difference between the WC and the minimum waist size. In the present study, the WC of the studied population was skewed; therefore, the WC was log-transformed. The minimum WC was estimated by the mean WC minus two standard deviations after log-transformation in the local participants aged 18–24 years.<sup>13, 22</sup>

## Statistical analyses

According to the hypertension status, the enrollees were divided into three groups (normotension, prehypertension, and hypertension). The frequency (%) was used to describe sex, marital status, education level, physical activity, BMI, smoker, and drinker. Mean  $\pm$  standard deviation (SDs) was used to describe the WC, WHR, fasting plasma glucose, total cholesterol, TG, SBP, DBP, and LAP. LAP was divided into four groups by the quartiles, i.e., Q1, Q2, Q3, and Q4. The differences of quantitative data across different hypertension statuses were analyzed by the Kruskal-Wallis H test because the data had skewed distribution. Categorical variables were analyzed by the Chi-squared test. The multivariate logistic regression model was used to analyze the relationship between LAP and risk factors of hypertension and prehypertension. The receiver operating characteristics (ROC) curves were applied to identify the superior obesity index and the best cut-off value of LAP to predict the hypertension risk. Moreover, the interaction effects between LAP and family history of hypertension were assessed by some relevant indicators, including the relative excess risk of interaction ( $RERI = OR_{11} - OR_{10} - OR_{01} + 1$ ), the attributable proportion due to interaction ( $AP = [OR_{11} - OR_{10} - OR_{01} + 1]/OR_{11}$ ), and the synergy index ( $SI = [OR_{11} - 1]/[OR_{01} - 1] + [OR_{10} - 1]$ ). If the interaction effect was not observed, the confidence interval of RERI and AP contained 0 and the confidence interval of S included 1.<sup>30</sup> The above indicators were calculated using an Excel table designed by Andersson et al.<sup>30</sup> All reported *P*-values were two-tailed, and a *P*-value of  $< 0.05$  was considered significant. Statistical analyses were performed using SPSS version 19.0 (SPSS Inc., Chicago, IL, USA).

## RESULTS

### LAP

According to Kahn's theory,<sup>13</sup> LAP was calculated as  $(WC - 60.6) \times (TG \text{ [mmol/L]})$  in males and  $(WC - 54.1) \times (TG \text{ [mmol/L]})$  in females based on the actual data obtained from the Southern Chinese population.<sup>22</sup>

1  
2  
3  
4  
5  
6  
7  
8  
9  
10  
11  
12  
13  
14  
15  
16  
17  
18  
19  
20  
21  
22  
23  
24  
25  
26  
27  
28  
29  
30  
31  
32  
33  
34  
35  
36  
37  
38  
39  
40  
41  
42  
43  
44  
45  
46  
47  
48  
49  
50  
51  
52  
53  
54  
55  
56  
57  
58  
59  
60

1     **Basic characteristics of the study participants**

2     A total number of 2079 of adults with an average age of 41.06 years were enrolled in

3     the present study, including 1002 males (48.29%) and 1077 females (51.80%). The

4     overall prevalence rates of normotension, prehypertension, and hypertension were

5     40.02%, 37.95%, and 22.03%, respectively. Male participants had a high prevalence

6     of prehypertension and hypertension than female participants ( $P < 0.001$ ). Statistically

7     significant differences in age ( $P < 0.001$ ), marital status ( $P < 0.001$ ), education level

8     ( $P < 0.001$ ), smoker ( $P < 0.001$ ), drinker ( $P < 0.001$ ), and family history of

9     hypertension ( $P = 0.005$ ) were observed between normotension, prehypertension, and

10    hypertension groups. However, no significant differences were observed in physical

11    activity ( $P = 0.550$ ) among the three groups. Anthropometric measurements found

12    significant differences in BMI ( $P < 0.001$ ), WC ( $P < 0.001$ ), WHR ( $P < 0.001$ ), LAP

13    ( $P < 0.001$ ) between the groups. Statistically significant differences found in

14    laboratory examinations including fasting plasma glucose ( $P < 0.001$ ), total

15    cholesterol ( $P < 0.001$ ), SBP ( $P < 0.001$ ), and DBP ( $P < 0.001$ ) between the groups

16    (Table 1). And the basic characteristics of different sex of study participants were

17    shown in table 2.

18    **LAP and the risk factors of hypertension**

19    In order to investigate the relationship between LAP and blood pressure, LAP was

20    divided into four groups by quartile in different sex (Table 3). A significant

21    association was observed between LAP and blood pressure in both male and female.

22    The results in males and females showed that SBP ( $P < 0.001$ ) and DBP ( $P < 0.001$ )

23    were relatively elevated in participants with higher LAP levels.

24    Multinomial logistic regression analysis was conducted to evaluate the association

25    between LAP quartiles and hypertension status (Table 4). Participants with the third

26    and the fourth quartile of LAP were more likely to develop prehypertension and

27    hypertension than those with the first quartile in both males and females.

28    After adjusting for age, marital status, and educational level, the risks of

prehypertension (adjusted OR: 3.14, 95% CI: 1.95–5.07) and hypertension (adjusted OR: 9.02; 95% CI: 5.11–15.93) significantly increased in male participants with the fourth quartile compared with those with the first quartile. For females, increasing risks of prehypertension (adjusted OR: 3.26, 95% CI: 2.09–5.10) and hypertension (adjusted OR: 6.32; 95% CI: 3.42–11.65) were observed in participants with the fourth LAP quartile compared with those with the first one.

After controlling for age, marital status, educational level, physical activity, smoking, alcohol consumption, BMI, WHR, fasting plasma glucose, and family history of hypertension, the risks of prehypertension (adjusted OR: 1.67, 95% CI: 0.96–2.92) and hypertension (adjusted OR: 2.79, 95% CI: 1.43–5.44) significantly increased in male participants with the fourth quartile compared with those with the first quartile. Meanwhile, increasing risks of prehypertension (adjusted OR: 2.10, 95% CI: 1.26–3.51) and hypertension (adjusted OR: 3.15, 95% CI: 1.56–6.39) were observed in female participants with the fourth LAP quartile compared with those with the first one.

The results of ROC curves analysis in males and females were shown in Figure. 1 and 2 and Table 5. LAP (AUC = 0.721; 95% CI: 0.680–0.761) was a better indicator to predict different types of hypertension than BMI (AUC = 0.698; 95% CI: 0.658–0.737), WHR (AUC = 0.684; 95% CI: 0.643–0.726) and TG (AUC = 0.663; 95% CI: 0.620–0.706) in females; however, WC (AUC = 0.734 95% CI: 0.700–0.769) performed better than BMI (AUC = 0.707, 95% CI: 0.672–0.742), WHR (AUC = 0.688; 95% CI: 0.650–0.725), LAP (AUC = 0.677; 95% CI: 0.640–0.713) and TG (AUC = 0.607; 95% CI: 0.568–0.646) on males. The best cut-off values of LAP to predict hypertension were 63.892 in males and 30.860 in females.

### **Interaction effects between LAP and family history of hypertension**

The interaction effects between LAP and family history of hypertension are presented in Table 6. Significant interaction effects between LAP and family history of hypertension were observed in males. The results of RERI (1.652; 95% CI: 0.267–3.037) and AP (0.516; 95% CI: 0.238–0.794) indicated a significant interaction

1  
2  
3  
4  
5  
6  
7  
8  
9  
10  
11  
12  
13  
14  
15  
16  
17  
18  
19  
20  
21  
22  
23  
24  
25  
26  
27  
28  
29  
30  
31  
32  
33  
34  
35  
36  
37  
38  
39  
40  
41  
42  
43  
44  
45  
46  
47  
48  
49  
50  
51  
52  
53  
54  
55  
56  
57  
58  
59  
60

effect of family history of hypertension and LAP on hypertension, but the result of SI (3.998; 95% CI: 0.897–17.820) did not.

However, no statistically significant interaction effects were found between LAP and family history of hypertension in females, which is indicated by all the three indicators. RERI was - 0.673 (95% CI: -2.566–1.220); AP was -0.328 (95% CI: -1.451–0.795); and SI was 0.610 (95% CI: 0.125–2.979).

**Discussion**

With the rapid development of the economy and sedentary lifestyle, elevated blood pressure has become a common and serious public health issue.<sup>31</sup> The prevalence of prehypertension and hypertension significantly increased.<sup>32</sup> Elevated blood pressure is caused by diverse factors, among which obesity is closely related to hypertension.<sup>33</sup> The prevalence of obesity increased by 13% in urban areas and by 85% in rural areas in China, and more attention should thus be paid to this issue.<sup>17</sup> Extensive studies found that obesity, especially visceral adipose tissue, could strongly increase the blood pressure.<sup>33</sup>

The mechanisms underlying the interaction between obesity and hypertension are complicated. The mechanisms of obesity-induced hypertension include sodium retention, insulin resistance, activation of renin-angiotensin-aldosterone, altered vascular function, and secretion of relevant adipokines.<sup>34</sup> Besides, the mechanisms of blood pressure increase can be activated by visceral fat.<sup>35</sup>

Substantial evidence proved that the harm of the fat accumulation was greater than the total amount of fat.<sup>36, 37</sup> However, traditional obesity indexes, such as BMI, WC, and WHR, have limitations of distinguishing differences between subcutaneous fat and visceral fat. Therefore, a new obesity index that can predict visceral fat easily and effectively is urgently needed. After Kahn first demonstrated that LAP performs better than BMI for recognizing the cardiovascular risk, domestic and foreign scholars paid increasing attention to LAP. LAP, a combination of WC and TG, is an accessible and inexpensive way to assess visceral fat.<sup>13</sup> It is a well-known fact that TG reflect the

1 degree of visceral fat accumulation and WC strongly associated with hypertension.<sup>12</sup>  
2 Notably, hypertriglyceridemic waist (HTGW) is also calculated based on the  
3 combination of TG and WC. However, LAP, as a continuous indicator, is superior to  
4 reflect visceral fat than HTGW,<sup>38</sup> a discontinuous indicator.<sup>21</sup> Therefore, LAP was  
5 used as a visceral obesity indicator in this study.

6 LAP is based on the hypothesis of minimum waist circumference includes the  
7 rachis, abdominal viscera and muscle.<sup>13</sup> Therefore, the differences between the actual  
8 WC and the minimum WC can represent abdominal adipose tissue.<sup>13</sup> Notably, LAP in  
9 almost all studies is calculated by data obtained based on the third National Health  
10 and Nutrition Examination Survey in the United States.<sup>13</sup> Because of differences in  
11 race, dietary habits, or lifestyle, individuals from different countries should have  
12 different visceral adipose tissues. It demonstrated that there are considerable  
13 differences in visceral adipose tissues between Chinese individuals and Europeans or  
14 Americans.<sup>39</sup> Therefore, LAP was calculated in our study using a modified formula so  
15 that it could apply to the individuals dwelling in Southern China.

16 As expected, a significant association was found between LAP and hypertension in  
17 the present study. Our findings are consistent with those in studies by Zhong et al,<sup>17</sup>  
18 Song et al,<sup>37</sup> and Shen et al,<sup>22</sup> all of which have demonstrated that LAP is an effective  
19 and reliable diagnostic indicator of hypertension. Participants with significantly  
20 higher LAP had higher risks of prehypertension and hypertension than those with  
21 lower LAP. Multinomial logistic regression analysis revealed that after adjusting for  
22 other factors, the risks of prehypertension and hypertension in the group with the  
23 highest LAP level were 2.10 and 3.15 times higher in females, respectively, than  
24 those in the group with the lowest LAP.

25 Wang et al. found LAP is a better index to predict the risk of hypertension.<sup>40</sup>  
26 However, Gao et al found that the performance of LAP was superior to that of BMI in  
27 male Mongolians;<sup>23</sup> this findings may be due to the apparently lower prevalence of  
28 high TG in female Mongolians than in male Mongolians (13.20% vs 23.10%,  $P <$   
29 0.05), and the facts might disturb the association between LAP and hypertension in

1  
2  
3  
4  
5  
6  
7  
8  
9  
10  
11  
12  
13  
14  
15  
16  
17  
18  
19  
20  
21  
22  
23  
24  
25  
26  
27  
28  
29  
30  
31  
32  
33  
34  
35  
36  
37  
38  
39  
40  
41  
42  
43  
44  
45  
46  
47  
48  
49  
50  
51  
52  
53  
54  
55  
56  
57  
58  
59  
60

female Mongolians. Several studies found the superiority of LAP over BMI for detection of hypertension and prehypertension in both genders.<sup>21, 37, 40</sup> However, in the present study, we also found that LAP perform better than BMI in female. According to Kahn,<sup>41</sup> the annual LAP changes were reduced at older age in male. Advancing age is associated with a progressive increase in systolic BP levels and with development and progression of arterial hypertension because of a number of factors, including atherosclerotic changes, large artery stiffening, altered renal function, and arterial baroreflex impairment.<sup>42</sup> That is to say, increase in blood pressure was thought to be an unavoidable consequence of aging. Thus, the superiority of LAP for predicting hypertension in male may be disturbed by the larger-scale proportion of elder man (23.7%) in our study. In our study, LAP perform better in predicting the hypertension risk than TG in both sex. However, due to low predictive value of TG in southern China, LAP which combines of TG and WC is slightly inferior to WC.

In general, LAP, which applied to the Southern Chinese population, was a better indicator for predicting the hypertension risk in females in this study. In addition, large studies have demonstrated that family history of hypertension is a critical risk factor for hypertension, and individuals with family history of hypertension are 2–4 times more likely to develop hypertension than those without the family history of hypertension.<sup>43</sup> The interaction analysis in this study indicates the synergistic effect of LAP and family history on the hypertension risk in males, but no statistically significant differences in the interaction effect in females. This findings might be due to the fact there was no statistically significant difference between females and the family history of hypertension in our study ( $\chi^2=6.847$  ,  $P=0.0355>0.05$ ). In fact, cardiovascular events occur at a lower rate in females than in males.<sup>44</sup> In our study, the female participants who had both LAP and family history of hypertension were rarely observed and the prevalence rates of hypertension at a lower rate in females than in males no matter premenopausal status or menopausal status.<sup>45</sup> Our study suffers from a small sample size, especially in females. The fewer positive female observers which had higher LAP and family history of hypertension lead to no

statistically significant differences in the interaction effect on the hypertension risk in females. The interaction in female was not statistically significant, but their synergistic effect was obvious. The synergistic effect between family history of hypertension and LAP on the hypertension risk was demonstrated in our study as well as in other studies.<sup>21, 40</sup> Visceral obesity and family history of hypertension may result in increased blood pressure through some unknown mechanisms. However, further studies are needed to investigate the interaction effect between LAP and family history of hypertension on the hypertension risk.

To date, LAP is an inexpensive screening tool to identify visceral adipose tissue, and the method has high reproducibility. LAP, which was proposed by Kahn, was developed for the Western population. Thus this study explored the validity of LAP, which was calculated based on the Southern China population, and the interactive effects of LAP and family history of hypertension. The findings suggest LAP might perform better in predicting the hypertension risk than BMI, WHR and TG in Southern Chinese females. Furthermore, the interaction analysis in this study indicates the synergistic effect of LAP and family history on the hypertension risk. Although, the interaction in female was not statistically significant, their synergistic effect was obvious.

This study has some limitations. First of all, because this is a cross-sectional study, the present results are not sufficient to indicate causality. Secondly, the population of our study can partially represent the general population in the Southern China, but can not fully represent this region. Furthermore, this article is lack of adjustment for renal function, and other risk factors for hypertension (such as serum uric acid). Finally, because of the small sample size in this study, further studies with a larger sample size are needed to investigate whether the modified LAP applies to all the residents dwelling in Southern China.

## CONCLUSION

In conclusion, LAP significantly associated with the hypertension risk, and higher LAP levels had relatively higher blood pressure. LAP performed better in predicting

1  
2  
3  
4  
5  
6  
7  
8  
9  
10  
11  
12  
13  
14  
15  
16  
17  
18  
19  
20  
21  
22  
23  
24  
25  
26  
27  
28  
29  
30  
31  
32  
33  
34  
35  
36  
37  
38  
39  
40  
41  
42  
43  
44  
45  
46  
47  
48  
49  
50  
51  
52  
53  
54  
55  
56  
57  
58  
59  
60

hypertension of the Southern China female population than BMI, WHR, and TG did. Moreover, LAP and family history of hypertension might synergistically increase the risk of hypertension.

**Acknowledgements**

We gratefully acknowledge Dr. Pei-Xi Wang, Dr. Jin-Xiang Ma, Xin-Yu Bao, Yi-Xian Xie, Xiao-Xia Zhang, Xin Peng, Yan Liu and Meng-Jiao Cheng for their excellent work in study coordination, data collection, and management.

**Contributors**

Jun-Xuan Huang, Pei-Xi Wang and Jin-Xiang Ma conceived and designed the study. Jun-Xuan Huang, Xin-Yu Bao, Yi-Xian Xie, Xiao-Xia Zhang, Xin Peng, Yan Liu and Meng-Jiao Cheng contributed to collection of the data, analyzed the data and interpretation of the results. Jun-Xuan Huang wrote the draft manuscript. Jin-Xiang Ma, Pei-Xi Wang and Jun-Xuan Huang finalized the manuscript with inputs from all authors. All of the authors approved the final version submitted for publication.

**Funding**

This study was supported by Talent Introduction Fund of Guangzhou Medical University (2009).

**Competing interests**

The authors declared that they had no conflict of interest.

**Ethics statement**

This study was approved by the Ethics Committee of Guangzhou Medical University. Written informed consent was obtained from each study participant before investigation.

**Data sharing statement**

Our data might not be shared directly, because it's our team work and the data belongs to our team. Thus consent should be attained from team members.

**References**

1. Kearney PM, Whelton M, Reynolds K, et al. Global burden of hypertension:

- 1 analysis of worldwide data. *TheLancet* 2005;365(9455):217-223.  
2 doi:10.1016/S0140-6736(05)17741-1
- 3 2. Beaney T, Schutte AE, Tomaszewski M, et al. May Measurement Month 2017: an  
4 analysis of blood pressure screening results worldwide. *The Lancet Global*  
5 *Health* 2018;6(7):e736-e743. doi:10.1016/S2214-109X(18)30259-6
- 6 3. Bundy JD, He J. Hypertension and Related Cardiovascular Disease Burden in  
7 China. *Ann Glob Health* 2018;82(2):227-233. doi:10.1016/j.aogh.2016.02.002
- 8 4. Macia E, Gueye L, Duboz P. Hypertension and Obesity in Dakar, Senegal. *Plos*  
9 *One* 2016;11(9):e0161544. doi:10.1371/journal.pone.0161544
- 10 5. Tang L, Zhang F, Tong N. The association of visceral adipose tissue and  
11 subcutaneous adipose tissue with metabolic risk factors in a large population of  
12 Chinese adults. *Clin Endocrinol* 2016;85(1):46-53. doi:10.1111/cen.13013
- 13 6. Wandeler G, Paccaud F, Vollenweider P, et al. Strength of Family History in  
14 Predicting Levels of Blood Pressure, Plasma Glucose and Cholesterol. *Public*  
15 *Health Genom* 2010;13(3):143-154. doi:10.1159/000233228
- 16 7. Liu M, He Y, Jiang B, et al. Association Between Family History and  
17 Hypertension Among Chinese Elderly. *Medicine* 2015;94(48):e2226.  
18 doi:10.1097/MD.0000000000002226
- 19 8. Al-Safi SA, Aboul-Enein FH, Aboul-Enein BH, et al. Influence of family history  
20 and lifestyle on blood pressure and heart rate in young adults in Jordan. *Public*  
21 *Health* 2006;120(11):1027-1032. doi:10.1016/j.puhe.2006.06.009
- 22 9. Alhawari HH, Al-Shelleh S, Alhawari HH, et al. Blood Pressure and Its  
23 Association with Gender, Body Mass Index, Smoking, and Family History  
24 among University Students. *Int J Hypertens* 2018;2018:1-5.  
25 doi:10.1155/2018/4186496
- 26 10. Ibrahim MM. Subcutaneous and visceral adipose tissue: structural and functional  
27 differences. *Obes Rev* 2010;11(1):11-18. doi:10.1111/j.1467-789X.2009.00623.x
- 28 11. Chen W, Wilson JL, Khaksari M, et al. Abdominal fat analyzed by DEXA scan  
29 reflects visceral body fat and improves the phenotype description and the  
30 assessment of metabolic risk in mice. *Am J Physiol-Endoc M*

- 2012;303(5):E635-E643. doi:10.1152/ajpendo.00078.2012
12. Nurdiantami Y, Watanabe K, Tanaka E, et al. Association of general and central obesity with hypertension. *Clin Nutr* 2018;37(4):1259-1263. doi:10.1016/j.clnu.2017.05.012
13. Kahn HS. The "lipid accumulation product" performs better than the body mass index for recognizing cardiovascular risk: a population-based comparison. *Bmc Cardiovasc Disor* 2005;5(1):26-26. doi:10.1186/1471-2261-5-26
14. Ray L, Ravichandran K, Nanda SK. Comparison of Lipid Accumulation Product Index with Body Mass Index and Waist Circumference as a Predictor of Metabolic Syndrome in Indian Population. *Metab Syndr Relat D* 2018;16(5):240-245. doi:10.1089/met.2017.0119
15. Cicero A F G, Gitto S, Fogacci F, et al. Fatty liver index is associated to pulse wave velocity in healthy subjects: Data from the Brisighella Heart Study. *European Journal of Internal Medicine* 2018:S0953620518301262. doi:10.1097/01.hjr.0000136566.89429.63
16. Lee JW, Lim NK, Park HY. The product of fasting plasma glucose and triglycerides improves risk prediction of type 2 diabetes in middle-aged Koreans. *Bmc Endocr Disord* 2018;18(1):33. doi:10.1186/s12902-018-0259-x
17. Zhong C, Xia W, Zhong X, et al. Lipid Accumulation Product and Hypertension Related to Stroke: a 9.2-Year Prospective Study Among Mongolians in China. *J Atheroscler Thromb* 2016;23(7):830-838. doi:10.5551/jat.33514
18. Cicero A F G, D'Addato S, Reggi A, et al. Gender Difference in Hepatic Steatosis Index and Lipid Accumulation Product Ability to Predict Incident Metabolic Syndrome in the Historical Cohort of the Brisighella Heart Study. *Metabolic Syndrome and Related Disorders* 2013; 11(6):412-416.
19. Wakabayashi I. Associations of Blood Lipid-Related Indices with Blood Pressure and Pulse Pressure in Middle-Aged Men. *Metab Syndr Relat D* 2015;13(1):22-28. doi:10.1089/met.2014.0093
20. de Oliveira CC, Roriz AKC, Ramos LB, et al. Indicators of Adiposity Predictors of Metabolic Syndrome in the Elderly. *Ann Nutr Metab* 2017;70(1):9-15.

- doi:10.1159/000455333
21. Song J, Chen X, Zhao Y, et al. Risk factors for prehypertension and their interactive effect: a cross-sectional survey in China. *Bmc Cardiovasc Disor* 2018;18(1). doi:10.1186/s12872-018-0917-y
  22. Shen YY, Chen JC, Li G, et al. Relationship of lipid accumulation product with hypertension and diabetes among Beijing residents study. *Zhonghua yu fang yi xue za zhi [Chinese journal of preventive medicine]* 2017;51(5):415.
  23. Gao X, Wang G, Wang A, et al. Comparison of lipid accumulation product with body mass index as an indicator of hypertension risk among Mongolians in China. *Obes Res Clin Pract* 2013;7(4):e308-e314. doi:10.1016/j.orcp.2012.02.002
  24. Song F, Cho M S. Geography of Food Consumption Patterns between South and North China. *Foods* 2017;6(5). doi:10.3390/foods6050034.
  25. Huang Z, Wu X, Stamler J, et al. A north-south comparison of blood pressure and factors related to blood pressure in the People's Republic of China: a report from the PRC-USA Collaborative Study of Cardiovascular Epidemiology. *Journal of Hypertension* 1994; 12(9):1103-12.
  26. Wu Z, Yao C, Zhao D, et al. Cardiovascular disease risk factor levels and their relations to CVD rates in China--results of Sino-MONICA project. *European Journal of Cardiovascular Prevention & Rehabilitation* 2004; 11(4):275-283.
  27. Zhao L, Stamler J, Yan L L, et al. Blood Pressure Differences Between Northern and Southern Chinese: Role of Dietary Factors The International Study on Macronutrients and Blood Pressure. *Hypertension* 2004; 43(6):1332-1337.
  28. Rosenberg DE, Bull FC, Marshall AL, Sallis JF, Bauman AE. Assessment of sedentary behavior with the international physical activity questionnaire. *J Phys Act Health*. 2008;5:S30-44.
  29. Zhang M, Batu B, Tong W, et al. Prehypertension and Cardiovascular Risk Factor Clustering Among Mongolian Population in Rural and Animal Husbandry Area, Inner Mongolia, China. *Circ J* 2009;73(8):1437-1441. doi:10.1253/circj.CJ-09-0101

1  
2  
3  
4  
5  
6  
7  
8  
9  
10  
11  
12  
13  
14  
15  
16  
17  
18  
19  
20  
21  
22  
23  
24  
25  
26  
27  
28  
29  
30  
31  
32  
33  
34  
35  
36  
37  
38  
39  
40  
41  
42  
43  
44  
45  
46  
47  
48  
49  
50  
51  
52  
53  
54  
55  
56  
57  
58  
59  
60

30. Andersson T, Alfredsson L, Källberg H, et al. Calculating measures of biological interaction. *Eur J Epidemiol* 2005;20(7):575-579. doi:10.1007/s10654-005-7835-x

31. Lackland DT, Beilin LJ, Campbell NRC, et al. Global Implications of Blood Pressure Thresholds and Targets. *Hypertension* 2018;71(6):985-987. doi:10.1161/HYPERTENSIONAHA.118.11280

32. Wang Z, Zeng X, Chen Z, et al. Association of visceral and total body fat with hypertension and prehypertension in a middle-aged Chinese population. *J Hypertens* 2015;33(8):1555-62. doi:10.1097/HJH.0000000000000602

33. Stabouli S, Papakatsika S, Kotsis V. The role of obesity, salt and exercise on blood pressure in children and adolescents. *Expert Rev Cardiovasc Ther* 2011;9(6):753-61. doi:10.1586/erc.11.63

34. Kotchen TA. Obesity-Related Hypertension: Epidemiology, Pathophysiology, and Clinical Management. *Am J Hypertens* 2010;23(11):1170-1178. doi:10.1038/ajh.2010.172

35. Boscaro M, Giacchetti G, Ronconi V. Visceral adipose tissue: emerging role of gluco- and mineralocorticoid hormones in the setting of cardiometabolic alterations: Adipose tissue and adrenal hormones. *Ann Ny Acad Sci* 2012;1264(1):87-102. doi:10.1111/j.1749-6632.2012.06597.x

36. Li Y, Bujo H, Takahashi K, et al. Visceral fat: higher responsiveness of fat mass and gene expression to calorie restriction than subcutaneous fat. *Exp Biol Med (Maywood)* 2003;228(10):1118-23.

37. Song J, Zhao Y, Nie S, et al. The effect of lipid accumulation product and its interaction with other factors on hypertension risk in Chinese Han population: A cross-sectional study. *Plos One* 2018;13(6):e0198105. doi:10.1371/journal.pone.0198105

38. Janghorbani M, Aminorroaya A, Amini M. Comparison of Different Obesity Indices for Predicting Incident Hypertension. *High Blood Pressure & Cardiovascular Prevention* 2017;24(2):157-166. doi:10.1007/s40292-017-0186-3

39. Nazare J, Smith JD, Borel A, et al. Ethnic influences on the relations between

- abdominal subcutaneous and visceral adiposity, liver fat, and cardiometabolic risk profile: the International Study of Prediction of Intra-Abdominal Adiposity and Its Relationship With Cardiometabolic Risk/Intra-Abdominal Adiposity. *The American Journal of Clinical Nutrition* 2012;96(4):714-726. doi:10.3945/ajcn.112.035758
40. Wang H, Chen Y, Sun G, et al. Validity of cardiometabolic index, lipid accumulation product, and body adiposity index in predicting the risk of hypertension in Chinese population. *Postgraduate Medicine* 2018;130(3):325-333. doi:10.1080/00325481.2018.1444901
41. Kahn H S, Cheng Y J. Longitudinal changes in BMI and in an index estimating excess lipids among white and black adults in the United States. *Int J Obes* 2008; 32(1):136-143.
42. Pinto E. Blood pressure and ageing. *Postgrad Med J* 2007; Feb;83(976):109-14. doi: 10.1136/pgmj.2006.048371
43. TOZAWA M, OSHIRO S, ISEKI C, et al. Family History of Hypertension and Blood Pressure in a Screened Cohort. *Hypertens Res* 2001;24(2):93-98. doi:10.1291/hypres.24.93
44. Doumas M, Papademetriou V, Faselis C, et al. Gender Differences in Hypertension: Myths and Reality. *Curr Hypertens Rep* 2013;15(4):321-330. doi:10.1007/s11906-013-0359-y
45. Ramezani TF, Behboudi-Gandevani S, Ghanbarian A, et al. Effect of menopause on cardiovascular disease and its risk factors: a 9-year follow-up study. *Climacteric*. 2014 Apr;17(2):164-72. doi: 10.3109/13697137.2013.828197.

## The titles and legends of figure

### Title

**Fig.1** The ROC curve of different obesity indexes in predicting hypertension in males.

### legend

LAP: lipid accumulation product; BMI: body mass index; WHR: waist-hip ratio; WC: waist circumference; TG: Triglyceride.

1  
2  
3  
4  
5  
6  
7  
8  
9  
10  
11  
12  
13  
14  
15  
16  
17  
18  
19  
20  
21  
22  
23  
24  
25  
26  
27  
28  
29  
30  
31  
32  
33  
34  
35  
36  
37  
38  
39  
40  
41  
42  
43  
44  
45  
46  
47  
48  
49  
50  
51  
52  
53  
54  
55  
56  
57  
58  
59  
60

1

2     **Title**

3     **Fig.2** The ROC curve of different obesity indexes in predicting hypertension in  
4     females.

5     **legend**

6     LAP: lipid accumulation product; BMI: body mass index; WHR: waist-hip ratio; WC:  
7     waist circumference; TG: Triglyceride.

**Table 1** Basic characteristics of the participants

| Variables                     | Normotension<br>(N = 832) | Prehypertension<br>(N = 789) | Hypertension<br>(N = 458) | $\chi^2 / Z$ | P-value |
|-------------------------------|---------------------------|------------------------------|---------------------------|--------------|---------|
| Sex (%)                       |                           |                              |                           | 135.625      | < 0.001 |
| Male                          | 32.57                     | 58.68                        | 58.52                     |              |         |
| Female                        | 67.43                     | 41.32                        | 41.48                     |              |         |
| Age (years)                   | 36.42 ± 10.59             | 41.38 ± 12.71                | 48.93 ± 12.75             | 267.206      | < 0.001 |
| Marital status (%)            |                           |                              |                           | 21.287       | < 0.001 |
| Currently not married         | 23.20                     | 18.76                        | 12.66                     |              |         |
| Currently married             | 76.80                     | 81.24                        | 87.34                     |              |         |
| Education level (%)           |                           |                              |                           | 101.355      | < 0.001 |
| Elementary school and lower   | 15.87                     | 21.55                        | 36.46                     |              |         |
| Secondary school              | 36.30                     | 38.53                        | 39.96                     |              |         |
| Senior high school and higher | 47.83                     | 39.92                        | 23.58                     |              |         |
| Physical activity (%)         |                           |                              |                           | 2.688        | 0.611   |

1  
2  
3  
4  
5  
6  
7  
8  
9  
10  
11  
12  
13  
14  
15  
16  
17  
18  
19  
20  
21  
22  
23  
24  
25  
26  
27  
28  
29  
30  
31  
32  
33  
34  
35  
36  
37  
38  
39  
40  
41  
42  
43  
44  
45  
46

|                 |       |       |       |         |         |
|-----------------|-------|-------|-------|---------|---------|
| Seldom or never | 35.70 | 34.22 | 31.22 |         |         |
| Moderate        | 17.43 | 18.25 | 18.78 |         |         |
| High            | 46.87 | 47.53 | 50.00 |         |         |
| Smoker (%)      |       |       |       | 50.346  | < 0.001 |
| Non-smoker      | 82.25 | 71.61 | 67.90 |         |         |
| Smoker          | 16.18 | 26.87 | 28.61 |         |         |
| Former smoker   | 0.97  | 1.52  | 3.49  |         |         |
| Drinker (%)     |       |       |       | 30.865  | < 0.001 |
| Non-drinker     | 84.11 | 76.34 | 72.53 |         |         |
| Drinker         | 14.91 | 22.39 | 24.62 |         |         |
| Former drinker  | 0.98  | 1.27  | 2.85  |         |         |
| BMI             |       |       |       | 255.012 | < 0.001 |
| < 18.5          | 13.70 | 5.20  | 2.18  |         |         |
| 18.5–23.9       | 68.51 | 54.88 | 41.70 |         |         |
| 24–27.9         | 14.30 | 31.69 | 37.55 |         |         |

|                                    |               |               |                |          |         |
|------------------------------------|---------------|---------------|----------------|----------|---------|
| ≥ 28                               | 3.49          | 8.24          | 18.56          |          |         |
| WC                                 | 75.61±8.19    | 81.61±9.04    | 87.02±9.95     | 411.441  | < 0.001 |
| WHR                                | 0.85± 0.06    | 0.88± 0.07    | 0.91± 0.06     | 248.475  | < 0.001 |
| Fasting plasma glucose (mmol/L)    | 4.69 ± 0.82   | 4.98 ± 1.33   | 5.31 ± 1.86    | 90.399   | < 0.001 |
| Total cholesterol (mmol/L)         | 4.70 ± 0.96   | 4.98 ± 1.07   | 5.26 ± 1.15    | 88.325   | < 0.001 |
| Triglyceride (mmol/L)              | 1.26 ± 0.83   | 1.77 ± 1.77   | 2.15 ± 2.25    | 178.995  | < 0.001 |
| Systolic blood pressure (mmHg)     | 107.97 ± 7.80 | 125.45 ± 6.65 | 144.78 ± 18.55 | 1533.137 | < 0.001 |
| Diastolic blood pressure (mmHg)    | 69.49 ± 6.40  | 79.59 ± 5.99  | 91.49 ± 11.33  | 1206.505 | < 0.001 |
| Family history of hypertension (%) |               |               |                | 18.391   | 0.005   |
| Only father                        | 11.42         | 11.03         | 11.14          |          |         |
| Only mother                        | 12.02         | 15.08         | 17.25          |          |         |
| Both parents                       | 5.41          | 4.82          | 8.95           |          |         |
| Neither                            | 71.15         | 69.07         | 62.66          |          |         |
| LAP                                | 29.14 ± 27.00 | 52.15 ± 63.50 | 75.87 ± 99.81  | 355.133  | < 0.001 |

1 BMI: body mass index; WC: waist circumference; WHR: waist-hip rate; LAP: lipid accumulation product.

1           **Table 2** Basic characteristics of the participants

| Male                          |                           |                              |                           |              |         | Female                    |                              |                           |              |         |
|-------------------------------|---------------------------|------------------------------|---------------------------|--------------|---------|---------------------------|------------------------------|---------------------------|--------------|---------|
| Variables                     | Normotension<br>(N = 271) | Prehypertension<br>(N = 463) | Hypertension<br>(N = 268) | $\chi^2 / Z$ | P-value | Normotension<br>(N = 561) | Prehypertension<br>(N = 326) | Hypertension<br>(N = 190) | $\chi^2 / Z$ | P-value |
| Age (years)                   | 36.57 ± 11.02             | 39.90 ± 12.37                | 47.15 ± 12.95             | 91.532       | < 0.001 | 36.35 ± 10.39             | 43.48 ± 12.92                | 51.43 ± 12.11             | 201.378      | < 0.001 |
| Marital status (%)            |                           |                              |                           | 26.019       | < 0.001 |                           |                              |                           | 7.928        | 0.019   |
| Currently not married         | 31.37                     | 22.46                        | 13.06                     |              |         | 19.25                     | 13.50                        | 12.11                     |              |         |
| Currently married             | 68.63                     | 77.54                        | 86.94                     |              |         | 80.75                     | 86.50                        | 87.89                     |              |         |
| Education level (%)           |                           |                              |                           | 24.179       | < 0.001 |                           |                              |                           | 116.258      | < 0.001 |
| Elementary school and lower   | 15.13                     | 15.33                        | 25.00                     |              |         | 16.22                     | 30.37                        | 52.63                     |              |         |
| Secondary school              | 37.64                     | 40.39                        | 45.15                     |              |         | 35.65                     | 35.89                        | 32.63                     |              |         |
| Senior high school and higher | 47.23                     | 44.28                        | 29.85                     |              |         | 48.13                     | 33.74                        | 14.74                     |              |         |
| Physical activity (%)         |                           |                              |                           | 0.807        | 0.668   |                           |                              |                           | 2.979        | 0.226   |
| insufficiently active         | 58.30                     | 56.16                        | 54.48                     |              |         | 50.62                     | 47.24                        | 43.68                     |              |         |

|    |                     |            |            |            |         |         |            |            |             |                 |
|----|---------------------|------------|------------|------------|---------|---------|------------|------------|-------------|-----------------|
| 1  |                     |            |            |            |         |         |            |            |             |                 |
| 2  |                     |            |            |            |         |         |            |            |             |                 |
| 3  |                     |            |            |            |         |         |            |            |             |                 |
| 4  |                     |            |            |            |         |         |            |            |             |                 |
| 5  | sufficiently active | 41.70      | 43.84      | 45.52      |         | 49.38   | 52.76      | 56.32      |             |                 |
| 6  |                     |            |            |            |         |         |            |            |             |                 |
| 7  | Smoker (%)          |            |            |            | 7.037   | 0.132   |            |            | 5.893       | 0.122           |
| 8  |                     |            |            |            |         |         |            |            |             |                 |
| 9  |                     |            |            |            |         |         |            |            |             |                 |
| 10 | Non-smoker          | 47.78      | 52.27      | 46.27      |         | 99.82   | 99.08      | 99.42      |             |                 |
| 11 |                     |            |            |            |         |         |            |            |             |                 |
| 12 | Smoker              | 49.26      | 45.36      | 48.13      |         | 0.18    | 0.61       | 1.05       |             |                 |
| 13 |                     |            |            |            |         |         |            |            |             |                 |
| 14 | Former smoker       | 2.96       | 2.38       | 5.60       |         | 0.00    | 0.31       | 0.53       |             |                 |
| 15 |                     |            |            |            |         |         |            |            |             |                 |
| 16 |                     |            |            |            |         |         |            |            |             |                 |
| 17 | Drinker (%)         |            |            |            | 3.790   | 0.432   |            |            | 4.993       | 0.255           |
| 18 |                     |            |            |            |         |         |            |            |             |                 |
| 19 | Non-drinker         | 60.74      | 61.47      | 57.30      |         | 95.62   | 97.53      | 94.15      |             |                 |
| 20 |                     |            |            |            |         |         |            |            |             |                 |
| 21 | Drinker             | 36.67      | 36.36      | 38.20      |         | 4.20    | 2.47       | 5.32       |             |                 |
| 22 |                     |            |            |            |         |         |            |            |             |                 |
| 23 | Former drinker      | 2.59       | 2.16       | 4.49       |         | 0.18    | 0.00       | 0.53       |             |                 |
| 24 |                     |            |            |            |         |         |            |            |             |                 |
| 25 |                     |            |            |            |         |         |            |            |             |                 |
| 26 | BMI                 |            |            |            | 148.700 | < 0.001 |            |            | 99.205      | < 0.001         |
| 27 |                     |            |            |            |         |         |            |            |             |                 |
| 28 | < 18.5              | 16.61      | 4.54       | 1.49       |         | 12.30   | 6.13       | 3.16       |             |                 |
| 29 |                     |            |            |            |         |         |            |            |             |                 |
| 30 | 18.5–23.9           | 65.68      | 54.64      | 38.43      |         | 69.88   | 55.21      | 46.32      |             |                 |
| 31 |                     |            |            |            |         |         |            |            |             |                 |
| 32 | 24–27.9             | 14.39      | 33.26      | 39.18      |         | 14.26   | 29.45      | 35.26      |             |                 |
| 33 |                     |            |            |            |         |         |            |            |             |                 |
| 34 | ≥ 28                | 3.32       | 7.56       | 20.90      |         | 3.57    | 9.20       | 15.26      |             |                 |
| 35 |                     |            |            |            |         |         |            |            |             |                 |
| 36 |                     |            |            |            |         |         |            |            |             |                 |
| 37 | WC                  | 77.26±7.85 | 82.95±8.49 | 88.71±9.43 | 193.623 | < 0.001 | 74.82±8.24 | 79.72±9.46 | 84.63±10.20 | 154.819 < 0.001 |
| 38 |                     |            |            |            |         |         |            |            |             |                 |
| 39 |                     |            |            |            |         |         |            |            |             |                 |
| 40 |                     |            |            |            |         |         |            |            |             |                 |
| 41 |                     |            |            |            |         |         |            |            |             |                 |
| 42 |                     |            |            |            |         |         |            |            |             |                 |
| 43 |                     |            |            |            |         |         |            |            |             |                 |
| 44 |                     |            |            |            |         |         |            |            |             |                 |
| 45 |                     |            |            |            |         |         |            |            |             |                 |
| 46 |                     |            |            |            |         |         |            |            |             |                 |

|                                    |               |               |                |         |         |               |               |               |         |         |
|------------------------------------|---------------|---------------|----------------|---------|---------|---------------|---------------|---------------|---------|---------|
| WHR                                | 0.86±0.06     | 0.89±0.06     | 0.92±0.06      | 126.195 | < 0.001 | 0.84±0.07     | 0.86±0.07     | 0.89±0.06     | 183.524 | < 0.001 |
| Fasting plasma glucose (mmol/L)    | 4.76 ± 1.08   | 4.98 ± 1.38   | 5.30 ± 1.94    | 24.275  | < 0.001 | 4.65 ± 0.66   | 4.99 ± 1.26   | 5.31 ± 1.75   | 71.169  | < 0.001 |
| Total cholesterol (mmol/L)         | 4.73 ± 1.00   | 4.98 ± 1.06   | 5.17 ± 1.25    | 20.500  | < 0.001 | 4.69 ± 0.94   | 4.98 ± 1.08   | 5.39 ± 0.98   | 73.075  | < 0.001 |
| Triglyceride (mmol/L)              | 1.54 ± 1.08   | 1.93 ± 1.94   | 2.38 ± 2.68    | 40.974  | < 0.001 | 1.12 ± 0.64   | 1.54 ± 1.47   | 1.82 ± 1.40   | 90.583  | < 0.001 |
| Systolic blood pressure (mmHg)     | 110.52 ± 6.13 | 125.60 ± 6.54 | 145.64 ± 17.04 | 706.430 | < 0.001 | 106.73 ± 8.21 | 125.23 ± 6.81 | 143.57± 20.48 | 755.356 | < 0.001 |
| Diastolic blood pressure (mmHg)    | 70.82 ± 5.79  | 80.27 ± 5.75  | 93.11 ± 10.66  | 592.747 | < 0.001 | 68.84 ± 6.59  | 78.63 ± 6.19  | 89.20 ± 11.87 | 553.348 | < 0.001 |
| Family history of hypertension (%) |               |               |                | 16.427  | 0.012   |               |               |               | 6.847   | 0.335   |
| Only father                        | 10.70         | 11.23         | 13.81          |         |         | 11.76         | 10.74         | 7.37          |         |         |
| Only mother                        | 11.44         | 17.28         | 18.28          |         |         | 12.30         | 11.96         | 15.79         |         |         |
| Both parents                       | 6.27          | 4.75          | 9.70           |         |         | 4.99          | 4.91          | 7.89          |         |         |
| Neither                            | 71.59         | 66.74         | 58.21          |         |         | 70.94         | 72.39         | 68.95         |         |         |
| LAP                                | 38.69 ± 34.85 | 58.43 ± 65.52 | 87.83 ± 120.94 | 113.508 | < 0.001 | 24.52 ± 20.75 | 43.24 ± 59.48 | 58.98 ± 54.19 | 159.320 | < 0.001 |

BMI: body mass index; WC: waist circumference; WHR: waist-hip rate; LAP: lipid accumulation product.

**Table 3** Comparison of blood pressure among four quartiles of LAP

| Variables                       | LAP            |                |                |                | Z       | P-value |
|---------------------------------|----------------|----------------|----------------|----------------|---------|---------|
|                                 | Q1             | Q2             | Q3             | Q4             |         |         |
| Male                            |                |                |                |                |         |         |
| Systolic blood pressure (mmHg)  | 119.33 ± 13.72 | 125.61 ± 14.86 | 129.23 ± 16.38 | 133.36 ± 17.85 | 106.793 | < 0.001 |
| Diastolic blood pressure (mmHg) | 75.84 ± 9.89   | 80.55 ± 9.84   | 82.56 ± 10.74  | 85.64 ± 11.36  | 106.285 | < 0.001 |
| Female                          |                |                |                |                |         |         |
| Systolic blood pressure (mmHg)  | 110.45 ± 13.91 | 114.95 ± 15.07 | 119.66 ± 15.91 | 130.25 ± 19.78 | 184.926 | < 0.001 |
| Diastolic blood pressure (mmHg) | 71.05 ± 9.45   | 73.29 ± 9.60   | 76.21 ± 9.96   | 81.04 ± 11.70  | 134.730 | < 0.001 |

**Table 4** Multinomial logistic regression analysis of LAP associated with hypertension status

| Quartiles of LAP | OR <sup>a</sup> (95% CI) |                           | OR <sup>b</sup> (95% CI) |                          | OR <sup>c</sup> (95% CI) |                         |
|------------------|--------------------------|---------------------------|--------------------------|--------------------------|--------------------------|-------------------------|
|                  | prehypertension          | hypertension              | prehypertension          | hypertension             | prehypertension          | hypertension            |
| Male             |                          |                           |                          |                          |                          |                         |
| Q1               | 1 (reference)            | 1 (reference)             | 1 (reference)            | 1 (reference)            | 1 (reference)            | 1 (reference)           |
| Q2               | 2.98***<br>(1.88, 4.72)  | 4.70***<br>(2.34, 9.45)   | 2.22***<br>(1.48, 3.34)  | 2.38**<br>(1.36, 4.16)   | 1.73*<br>(1.12, 2.67)    | 1.61<br>(0.89, 2.94)    |
| Q3               | 4.48***<br>(2.85, 7.03)  | 8.26***<br>(4.21, 16.21)  | 2.68***<br>(1.74, 4.12)  | 3.90***<br>(2.24, 6.82)  | 1.66*<br>(1.03, 2.68)    | 1.75<br>(0.94, 3.26)    |
| Q4               | 4.65***<br>(2.93, 7.36)  | 17.82***<br>(9.21, 34.46) | 3.14***<br>(1.95, 5.07)  | 9.02***<br>(5.11, 15.93) | 1.67<br>(0.96, 2.92)     | 2.79***<br>(1.43, 5.44) |
| Female           |                          |                           |                          |                          |                          |                         |
| Q1               | 1 (reference)            | 1 (reference)             | 1 (reference)            | 1 (reference)            | 1 (reference)            | 1 (reference)           |
| Q2               | 1.75**<br>(1.22, 2.51)   | 2.19**<br>(1.27, 3.77)    | 1.046<br>(0.69,1.58)     | 1.19<br>(0.62,2.29)      | 0.91<br>(0.59,1.41)      | 1.015<br>(0.51,2.03)    |

|    |                         |                            |                         |                          |                        |                         |
|----|-------------------------|----------------------------|-------------------------|--------------------------|------------------------|-------------------------|
| Q3 | 3.35***<br>(2.27, 4.93) | 6.50***<br>(3.83, 11.02)   | 1.68**<br>(1.11, 2.52)  | 1.87<br>(0.99, 3.49)     | 1.31<br>(0.84, 2.05)   | 1.19<br>(0.60, 2.38)    |
| Q4 | 5.99***<br>(3.74, 9.59) | 20.06***<br>(11.37, 35.38) | 3.26***<br>(2.09, 5.10) | 6.32***<br>(3.42, 11.65) | 2.10**<br>(1.26, 3.51) | 3.15***<br>(1.56, 6.39) |

1 OR=Odds ratio; CI=confidence interval; \*\*\*,  $P < 0.001$ ; \*\*,  $P < 0.01$ ; \*,  $P < 0.05$ .

2 <sup>a</sup>, unadjusted.

3 <sup>b</sup>, adjusted for age, sex, marital status, educational level

4 <sup>c</sup>, adjusted for physical activity, smoker, drinker, BMI, WHR, fasting plasma glucose, family history of hypertension, and all the factors in b.

6 **Table 5** Predicting hypertension by different obesity indexes

| Variables   | Cut-off value | Sensitivity (%) | Specificity (%) | Youden Index | AUC(95% CI)          | P-value |
|-------------|---------------|-----------------|-----------------|--------------|----------------------|---------|
| <b>Male</b> |               |                 |                 |              |                      |         |
| BMI         | 23.004        | 73.51           | 58.08           | 0.316        | 0.707 (0.672, 0.742) | < 0.001 |
| WHR         | 0.906         | 58.58           | 70.27           | 0.289        | 0.688 (0.650, 0.725) | < 0.001 |
| LAP         | 63.892        | 49.63           | 76.99           | 0.266        | 0.677 (0.640, 0.713) | < 0.001 |

|        |        |       |       |       |                      |         |
|--------|--------|-------|-------|-------|----------------------|---------|
| WC     | 85.05  | 65.67 | 72.60 | 0.383 | 0.734 (0.700, 0.769) | < 0.001 |
| TG     | 1.91   | 46.27 | 70.14 | 0.164 | 0.607 (0.568, 0.646) | < 0.001 |
| Female |        |       |       |       |                      |         |
| BMI    | 21.767 | 81.58 | 50.73 | 0.323 | 0.698 (0.658, 0.737) | < 0.001 |
| WHR    | 0.860  | 74.21 | 55.24 | 0.294 | 0.684 (0.643, 0.726) | < 0.001 |
| LAP    | 30.860 | 68.95 | 67.42 | 0.363 | 0.721 (0.680, 0.761) | < 0.001 |
| WC     | 79.90  | 72.11 | 64.94 | 0.370 | 0.725 (0.686, 0.766) | < 0.001 |
| TG     | 1.26   | 63.68 | 64.49 | 0.282 | 0.663 (0.620, 0.706) | < 0.001 |

BMI: body mass index; WHR: waist-hip rate; LAP: lipid accumulation product; WC: waist circumference; TG: Triglyceride; AUC: area under curve;  
OR=Odds ratio; CI=confidence interval.

**Table 6** Interaction effects between LAP and family history of hypertension

| Variables | Variables | N | OR <sup>c</sup> (95% CI) | Interaction indexes (95% CI) |
|-----------|-----------|---|--------------------------|------------------------------|
|-----------|-----------|---|--------------------------|------------------------------|

**Male**

LAP<sup>a</sup>      Family history<sup>b</sup>

|                  |                             |     |                         |                               |
|------------------|-----------------------------|-----|-------------------------|-------------------------------|
| -                | -                           | 486 | 1 (reference)           | RERI = 1.652 (0.267, 3.037)*  |
| -                | +                           | 215 | 1.189 (0.772, 1.832)    | AP = 0.516 (0.238, 0.794)*    |
| +                | -                           | 173 | 1.362 (0.875, 2.121)    | SI = 3.998 (0.897, 17.820)    |
| +                | +                           | 128 | 3.203*** (2.002, 5.124) |                               |
| <b>Female</b>    |                             |     |                         |                               |
| LAP <sup>a</sup> | Family history <sup>b</sup> |     |                         |                               |
| -                | -                           | 657 | 1 (reference)           | RERI = -0.673 (-2.566, 1.220) |
| -                | +                           | 276 | 1.995** (1.284, 3.099)  | AP = -0.328 (-1.451, 0.795)   |
| +                | -                           | 108 | 1.729* (1.023, 2.922)   | SI = 0.610 (0.125, 2.979)     |
| +                | +                           | 36  | 2.051 (0.919, 4.589)    |                               |

LAP: lipid accumulation production; RERI: relative excess risk of interaction ; AP: attributable proportion due to interaction; SI: synergy index; OR=Odds ratio; CI=confidence interval; \*\*\*,  $P < 0.001$ ; \*\*,  $P < 0.01$ ; \*,  $P < 0.05$ .

<sup>a</sup>, grouped by the cut-off values in Table 4.

<sup>b</sup>, family history of hypertension was defined as one parent or both parents having hypertension.

<sup>c</sup>, adjusted for age, marital status, educational level, physical activity, smoker, drinker, BMI, and WHR.

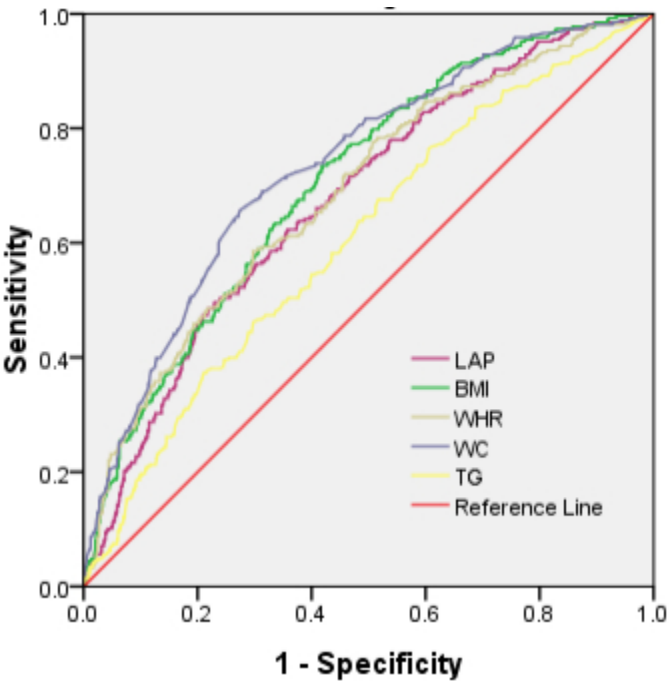

Fig.1 The ROC curve of different obesity indexes in predicting hypertension in males.  
legend  
LAP: lipid accumulation product; BMI: body mass index; WHR: waist-hip ratio; WC: waist circumference;  
TG: Triglyceride.

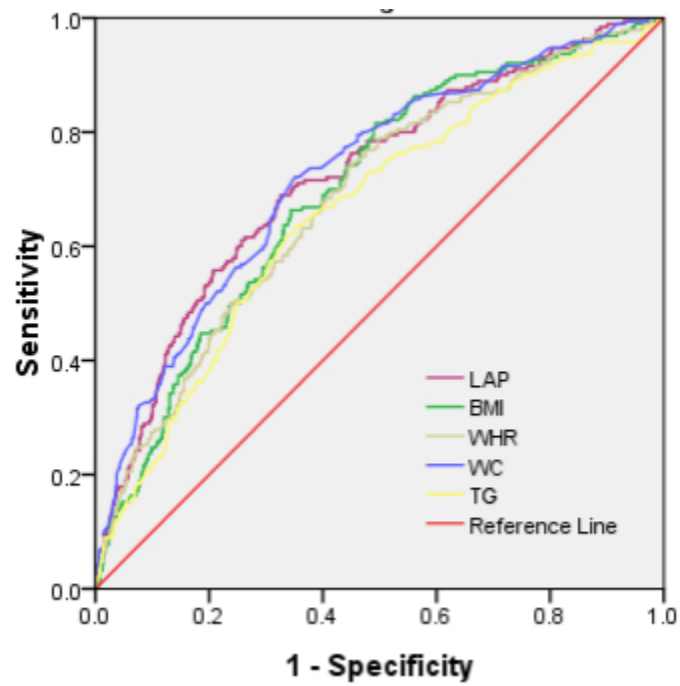

Fig.2 The ROC curve of different obesity indexes in predicting hypertension in females. legend LAP: lipid accumulation product; BMI: body mass index; WHR: waist-hip ratio; WC: waist circumference; TG: Triglyceride.

STROBE 2007 (v4) Statement—Checklist of items that should be included in reports of *cross-sectional studies*

| Section/Topic                | Item # | Recommendation                                                                                                                                                                       | Reported on page # |
|------------------------------|--------|--------------------------------------------------------------------------------------------------------------------------------------------------------------------------------------|--------------------|
| Title and abstract           | 1      | (a) Indicate the study’s design with a commonly used term in the title or the abstract                                                                                               | Page 1             |
|                              |        | (b) Provide in the abstract an informative and balanced summary of what was done and what was found                                                                                  | Page 2             |
| Introduction                 |        |                                                                                                                                                                                      |                    |
| Background/rationale         | 2      | Explain the scientific background and rationale for the investigation being reported                                                                                                 | Page 4-5           |
| Objectives                   | 3      | State specific objectives, including any prespecified hypotheses                                                                                                                     | Page 5             |
| Methods                      |        |                                                                                                                                                                                      |                    |
| Study design                 | 4      | Present key elements of study design early in the paper                                                                                                                              | Page 5             |
| Setting                      | 5      | Describe the setting, locations, and relevant dates, including periods of recruitment, exposure, follow-up, and data collection                                                      | Page 5             |
| Participants                 | 6      | (a) Give the eligibility criteria, and the sources and methods of selection of participants                                                                                          | Page 5-6           |
| Variables                    | 7      | Clearly define all outcomes, exposures, predictors, potential confounders, and effect modifiers. Give diagnostic criteria, if applicable                                             | Page 6-7           |
| Data sources/<br>measurement | 8*     | For each variable of interest, give sources of data and details of methods of assessment (measurement). Describe comparability of assessment methods if there is more than one group | Page 6-7           |
| Bias                         | 9      | Describe any efforts to address potential sources of bias                                                                                                                            | Page 3             |

|                        |     |                                                                                                                                                                                                              |                                       |
|------------------------|-----|--------------------------------------------------------------------------------------------------------------------------------------------------------------------------------------------------------------|---------------------------------------|
| Study size             | 10  | Explain how the study size was arrived at                                                                                                                                                                    | Page 6                                |
| Quantitative variables | 11  | Explain how quantitative variables were handled in the analyses. If applicable, describe which groupings were chosen and why                                                                                 | Page 7-8                              |
| Statistical methods    | 12  | (a) Describe all statistical methods, including those used to control for confounding                                                                                                                        | Page 7-8                              |
|                        |     | (b) Describe any methods used to examine subgroups and interactions                                                                                                                                          | Page 7-8                              |
|                        |     | (c) Explain how missing data were addressed                                                                                                                                                                  | Page 5                                |
|                        |     | (d) If applicable, describe analytical methods taking account of sampling strategy                                                                                                                           | Page 5                                |
|                        |     | (e) Describe any sensitivity analyses                                                                                                                                                                        | Not applicable                        |
| <b>Results</b>         |     |                                                                                                                                                                                                              |                                       |
| Participants           | 13* | (a) Report numbers of individuals at each stage of study—eg numbers potentially eligible, examined for eligibility, confirmed eligible, included in the study, completing follow-up, and analysed            | Page 8-9; Table 1; Table 2            |
|                        |     | (b) Give reasons for non-participation at each stage                                                                                                                                                         | Not application                       |
|                        |     | (c) Consider use of a flow diagram                                                                                                                                                                           | Not application                       |
| Descriptive data       | 14* | (a) Give characteristics of study participants (eg demographic, clinical, social) and information on exposures and potential confounders                                                                     | Page 8-9; Table 1; Table 2            |
|                        |     | (b) Indicate number of participants with missing data for each variable of interest                                                                                                                          | Not application                       |
| Outcome data           | 15* | Report numbers of outcome events or summary measures                                                                                                                                                         | Page 8-9; Table 1                     |
| Main results           | 16  | (a) Give unadjusted estimates and, if applicable, confounder-adjusted estimates and their precision (eg, 95% confidence interval). Make clear which confounders were adjusted for and why they were included | Page 9-10; Table 4; Table 6           |
|                        |     | (b) Report category boundaries when continuous variables were categorized                                                                                                                                    | Page 6-8; Table 1; Table 2; Table 3 ; |

|                          |    |                                                                                                                                                                            |                     |
|--------------------------|----|----------------------------------------------------------------------------------------------------------------------------------------------------------------------------|---------------------|
|                          |    |                                                                                                                                                                            | Table 6             |
|                          |    | (c) If relevant, consider translating estimates of relative risk into absolute risk for a meaningful time period                                                           | Not application     |
| Other analyses           | 17 | Report other analyses done—eg analyses of subgroups and interactions, and sensitivity analyses                                                                             | Page 10-11; Table 6 |
| <b>Discussion</b>        |    |                                                                                                                                                                            |                     |
| Key results              | 18 | Summarise key results with reference to study objectives                                                                                                                   | Page 12-14          |
| Limitations              | 19 | Discuss limitations of the study, taking into account sources of potential bias or imprecision. Discuss both direction and magnitude of any potential bias                 | Page 14             |
| Interpretation           | 20 | Give a cautious overall interpretation of results considering objectives, limitations, multiplicity of analyses, results from similar studies, and other relevant evidence | Page 12-14          |
| Generalisability         | 21 | Discuss the generalisability (external validity) of the study results                                                                                                      | Page 13             |
| <b>Other information</b> |    |                                                                                                                                                                            |                     |
| Funding                  | 22 | Give the source of funding and the role of the funders for the present study and, if applicable, for the original study on which the present article is based              | Page 14-15          |

\*Give information separately for cases and controls in case-control studies and, if applicable, for exposed and unexposed groups in cohort and cross-sectional studies.

**Note:** An Explanation and Elaboration article discusses each checklist item and gives methodological background and published examples of transparent reporting. The STROBE checklist is best used in conjunction with this article (freely available on the Web sites of PLoS Medicine at <http://www.plosmedicine.org/>, Annals of Internal Medicine at <http://www.annals.org/>, and Epidemiology at <http://www.epidem.com/>). Information on the STROBE Initiative is available at [www.strobe-statement.org](http://www.strobe-statement.org).

# BMJ Open

## Interaction of lipid accumulation product and family history of hypertension on hypertension risk: A cross-sectional study in the Southern Chinese population

|                                 |                                                                                                                                                                                                                                                                                                                                                                                                                                                                 |
|---------------------------------|-----------------------------------------------------------------------------------------------------------------------------------------------------------------------------------------------------------------------------------------------------------------------------------------------------------------------------------------------------------------------------------------------------------------------------------------------------------------|
| Journal:                        | <i>BMJ Open</i>                                                                                                                                                                                                                                                                                                                                                                                                                                                 |
| Manuscript ID                   | bmjopen-2019-029253.R4                                                                                                                                                                                                                                                                                                                                                                                                                                          |
| Article Type:                   | Original research                                                                                                                                                                                                                                                                                                                                                                                                                                               |
| Date Submitted by the Author:   | 04-Nov-2019                                                                                                                                                                                                                                                                                                                                                                                                                                                     |
| Complete List of Authors:       | Huang, junxuan; Guangzhou Medical University<br>Bao, XinYu; Guangzhou Medical University<br>Xie, yixian; Guangzhou Medical University<br>Zhang, xiaoxia; Guangzhou Medical University<br>Peng, xin; Guangzhou Medical University<br>Liu, yan; Guangzhou Medical University<br>Cheng, mengjiao; Guangzhou Medical University<br>Ma, JinXiang; Guangzhou Medical University<br>wang, peixi; General Practice Center, Nanhai Hospital, Southern Medical University |
| <b>Primary Subject Heading</b>: | Public health                                                                                                                                                                                                                                                                                                                                                                                                                                                   |
| Secondary Subject Heading:      | Epidemiology, Diabetes and endocrinology                                                                                                                                                                                                                                                                                                                                                                                                                        |
| Keywords:                       | Hypertension < CARDIOLOGY, LAP, Family history, Interaction effect                                                                                                                                                                                                                                                                                                                                                                                              |
|                                 |                                                                                                                                                                                                                                                                                                                                                                                                                                                                 |

SCHOLARONE™  
Manuscripts

mjx777108@hotmail.com, peixi001@163.com

## ABSTRACT

**Objectives:** This study aimed at investigating the applicability of a novel index based on waist circumference (WC) and Triglyceride (TG) which was named lipid accumulation product (LAP) in the Southern Chinese population, and compared the predictive effects of LAP and other obesity indicators on hypertension risk. Moreover, this study investigated the interactive effects of LAP and family history of hypertension.

**Methods:** A total number of 2079 of community-dwelling adults in Southern China were enrolled in this cross-sectional study. The participants underwent questionnaire surveys, anthropometric tests, and laboratory examinations. The multivariate logistic regression model and receiver operating characteristic (ROC) curves, including LAP, body mass index (BMI), waist-hip ratio (WHR), WC, and TG were used to assess the association between hypertension risk and obesity indexes. The interaction effects were evaluated by relative excess risk of interaction (RERI), attributable proportion due to interaction (AP), and synergy index (SI).

**Results:** Higher LAP levels have a relatively higher risk of having hypertension in both sexes (males: adjusted odds ratio [OR] = 2.79 per SD increase, 95% confidence interval [CI] = 1.43-5.44,  $P < 0.001$ ; females: adjusted OR: 3.15, 95% CI = 1.56-6.39,  $P < 0.001$ ). LAP (area under curve [AUC] = 0.721; 95% CI: 0.680-0.761) is a better indicator in identifying hypertension risk than BMI, WHR, and TG in females, but WC performed better in males. A significant interaction between LAP and family history of hypertension was observed in males (RERI = 1.652, 95% CI: 0.267-3.037; AP = 0.516, 95% CI: 0.238-0.794; SI = 3.998, 95% CI: 0.897-17.820), but there is no statistically significant differences in females.

**Conclusions:** LAP significantly associates with hypertension risk in the Southern Chinese population. It has better performance than BMI, WHR, and TG on predicting hypertension risk of the Southern Chinese female population. Moreover, LAP and family history of hypertension might synergistically increase the risk of hypertension.

1  
2  
3  
4  
5  
6  
7  
8  
9  
10  
11  
12  
13  
14  
15  
16  
17  
18  
19  
20  
21  
22  
23  
24  
25  
26  
27  
28  
29  
30  
31  
32  
33  
34  
35  
36  
37  
38  
39  
40  
41  
42  
43  
44  
45  
46  
47  
48  
49  
50  
51  
52  
53  
54  
55  
56  
57  
58  
59  
60

1    **Keywords: Hypertension, LAP, Family history, Interaction effect**

2    **Strengths and limitations of this study**

3    **Strengths:**

4    1. Our study is the first to examine the validity of LAP, which is calculated using a  
5    modified formula, in the Southern China population.

6    **Limitations:**

- 7    1. This is a cross-sectional study; the results are not sufficient to indicate causality.
- 8    2. The population of our study can partially represent the general population in the  
9    Southern China but cannot fully represent this region.
- 10    3. This study lacks of the adjustment for renal function, and other risk factors for  
11    hypertension (such as serum uric acid) .
- 12    4. This study has small sample size, so further studies with a larger sample size are  
13    needed to investigate whether the modified LAP applies to all the residents dwelling  
14    in Southern China.

## INTRODUCTION

Hypertension, a significant risk factor of cardiovascular disease,<sup>1</sup> is one of the most prevalent public health problems in the world and is the leading contributor to the global burden of disease and mortality. Nowadays, the number of adults with hypertension in the world is being predicted to increase by about 60% to a total of 1.56 billion in 2025, and one-third of adults are suffering from hypertension in China.<sup>2, 3</sup>

Obesity, especially visceral fat, and family history of hypertension contributes to hypertension significantly.<sup>4-6</sup> Numerous studies agree on the idea that people with hypertension's family history have higher chance to get hypertension.<sup>6-9</sup> Usually, when it comes to obesity, the indexes that are most frequently used to assess obesity are body mass index (BMI), waist circumference (WC), and waist-hip ratio (WHR); however, these traditional obesity indexes merely reflect the degrees of overweight and abdominal obesity, also, cannot distinguish the difference between subcutaneous fat and visceral fat.<sup>10</sup> Micromagnetic resonance imaging and microcomputed tomography, which are the visceral fat golden standard measurement methods, is inconvenient and expensive.<sup>11</sup> Moreover, they are not suitable for large-scale epidemiological investigations. Therefore, it is necessary to discover a new obesity indicator that can predict visceral fat from subcutaneous fat more conveniently and economically.

Recently, increasing attention has been directed towards lipid accumulation product (LAP). LAP, a new obesity index computed from WC and triglyceride (TG), is a useful indicator of visceral fat,<sup>12</sup> as demonstrated by Kahn in 2005<sup>13</sup>. Some studies suggest that LAP can also be used to identify metabolic syndromes,<sup>14, 15</sup> type 2 diabetes mellitus,<sup>16</sup> stroke,<sup>17</sup> and arterial stiffness.<sup>18</sup> Additionally, several cross-sectional studies conducted in Japan,<sup>19</sup> India,<sup>14</sup> and Brazil indicate that LAP significantly associated with cardiovascular disease and is a better indicator than BMI for identifying cardiovascular risk.<sup>13, 20</sup> A few national studies have investigated the association between LAP and hypertension in China, and all of them are conducted in

1  
2  
3  
4  
5  
6  
7  
8  
9  
10  
11  
12  
13  
14  
15  
16  
17  
18  
19  
20  
21  
22  
23  
24  
25  
26  
27  
28  
29  
30  
31  
32  
33  
34  
35  
36  
37  
38  
39  
40  
41  
42  
43  
44  
45  
46  
47  
48  
49  
50  
51  
52  
53  
54  
55  
56  
57  
58  
59  
60

northern China, including Bengbu,<sup>21</sup> Beijing,<sup>22</sup> and Inner Mongolia.<sup>23</sup> With a vast territory, China has a tremendous difference between South and North. Due to the geographical environment and dietary habits that have formed throughout its long history, there are some dietary and cultural differences between Northern and Southern China.<sup>24</sup> The Northern region shows a high intake of wheat, tubers, and liquor, etc. While southerner has a high intake of rice, vegetables, meat, poultry, fish etc.<sup>24</sup> The Carbohydrate-rich pattern of the northern region is associated with a high risk of hypertriglyceridemia and higher BMI. Meanwhile, significant differences are found in systolic blood pressure (SBP)/diastolic blood pressure (DBP) between southern Chinese and northern Chinese owing to different climate and dietary habits between southern and northern.<sup>25</sup> Studies have found that the northerners are heavier and have higher triglycerides level than southerners.<sup>26, 27</sup> Differences in dietary habits, or lifestyle, individuals from different regions should lead to different LAP. LAP has a different situation in the north and south. Thus, the applicability of LAP in predicting hypertension in Southern China is worth studying. However, rare studies have compared LAP with other obesity indexes in the Southern Chinese population. Besides, almost all studies about LAP are using the formula based on the third National Health and Nutrition Examination Survey in the US. Therefore, it is reasonable to suggest that the calculation formula of LAP needs to be modified in the Chinese population.

To the best of our knowledge, no studies have attempted to adjust the calculation formula of LAP so that it can apply to the Southern Chinese population, and rare studies have explored additive interactions between family history of hypertension and LAP. Thus, the primary purpose of this study was to investigate the applicability of LAP in the Southern Chinese population and compare the predictive effects of LAP and other obesity indicators on hypertension risk. The secondary purpose of the study was to assess interactive effects between LAP and family history of hypertension to predict the hypertension risk in the Southern Chinese population.

**METHODS**

## **Study design and subjects**

A cross-sectional survey based on community health was conducted in the Foshan city of Guangdong province in Southern China. Recruiting the enrollers took place on March 2017. The study samples were selected by a multistage and stratified random sampling method. The stratification according to the economic levels and randomly selected urban and rural at economic levels, then randomly selected communities according to proportion of urban and rural. Communities residents were then randomly selected from the household lists. A total of 3760 individuals were enrolled in this study; among them, 1681 participants who lacked complete data on demographic characteristics, anthropometric tests, or laboratory examinations were excluded. There were no statistically significant differences in age and sex between excluded participants and included participants. Finally, 2079 adults who had complete data were included in the analysis.

## **Patient and public involvement**

Patients or public were not involved in this study.

## **Ethics statement**

This study was approved by the Ethics Committee of Guangzhou Medical University. Written informed consent was obtained from each study participant before investigation.

## **General study questionnaire**

An interview-based survey was performed using a questionnaire by trained staff. Socio-demographic data, family history of hypertension, cigarette smoking, and alcohol drinking were investigated. Smokers were defined as the participants smoking at least 1 cigarette/day for at least 6 months. Drinkers were defined as individuals consuming at least 30 ml alcohol/week for 1 year or more. Physical activities were divided into “insufficiently active” and “sufficiently active.” Participants with “insufficiently active” were defined as those who performed activity less than 150 min/week. Participants with “sufficiently active” were defined as those who exercised

1  
2  
3  
4  
5  
6  
7  
8  
9  
10  
11  
12  
13  
14  
15  
16  
17  
18  
19  
20  
21  
22  
23  
24  
25  
26  
27  
28  
29  
30  
31  
32  
33  
34  
35  
36  
37  
38  
39  
40  
41  
42  
43  
44  
45  
46  
47  
48  
49  
50  
51  
52  
53  
54  
55  
56  
57  
58  
59  
60

more than 150min/week.<sup>28</sup> Marital status was classified as “currently not married” and “currently married”; “married” was regarded as “currently married,” and “divorced/widowed/single” was regarded as “currently not married.” Educational level was categorized as “elementary school or lower,” “secondary school,” and “senior high school or higher.”

**Anthropometric tests and laboratory examinations**

The participants were required to take off their shoes and wear lightweight clothing for weight and height measurements. WC was measured at the level of 1 cm above the navel.<sup>29</sup> Automatic sphygmomanometer (OMRON, hem-7125) was used to measure blood pressure (BP) of participants. BP measurement was conducted thrice in a quiet environment, and the participants rested at least one minute between each time of measurement. The mean of the three measurements was used in the analysis. Prehypertension was defined as SBP of 120–139 mmHg and/or DBP of 80–89 mmHg, and hypertension was defined as SBP of  $\geq 140$  mmHg, DBP of  $\geq 90$  mmHg, and/or a reported medical history of anti-hypertensive medication.<sup>29</sup> The BMI was calculated as weight in kilograms divided by the square of the height in meters. Overweight was defined as BMI of 24–27.9 kg/m<sup>2</sup>, and obesity was defined as BMI of  $\geq 28$  kg/m<sup>2</sup>. The fasting blood samples were collected from the participants in the morning after an overnight fast and were used to assess fasting plasma glucose, total cholesterol, and TG levels.

According to Kahn’s theory,<sup>13</sup> LAP is calculated as [WC (cm) - The minimum of WC (male)]  $\times$  [TG (mmol/L)] for males and [WC (cm) - The minimum of WC (female)]  $\times$  [TG (mmol/L)] for females, and the minimum waist size theoretically contains only the abdomen, muscle, viscera, and vertebral bone.<sup>13</sup> Visceral fat can be estimated by the difference between the WC and the minimum waist size. In the present study, the WC of the studied population was skewed; therefore, the WC was log-transformed. The minimum WC was estimated by the mean WC minus two standard deviations after log-transformation in the local participants aged 18–24 years.<sup>13, 22</sup>

## Statistical analyses

According to the hypertension status, the enrollees were divided into three groups (normotension, prehypertension, and hypertension). The frequency (%) was used to describe sex, marital status, education level, physical activity, BMI, smoker, and drinker. Mean  $\pm$  standard deviation (SDs) was used to describe the WC, WHR, fasting plasma glucose, total cholesterol, TG, SBP, DBP, and LAP. LAP was divided into four groups by the quartiles, i.e., Q1, Q2, Q3, and Q4. The differences of quantitative data across different hypertension statuses were analyzed by the Kruskal-Wallis H test because the data had skewed distribution. Categorical variables were analyzed by the Chi-squared test. The multivariate logistic regression model was used to analyze the relationship between LAP and risk factors of hypertension and prehypertension. The receiver operating characteristics (ROC) curves were applied to identify the superior obesity index and the best cut-off value of LAP to predict the hypertension risk. Moreover, the interaction effects between LAP and family history of hypertension were assessed by some relevant indicators, including the relative excess risk of interaction ( $RERI = OR_{11} - OR_{10} - OR_{01} + 1$ ), the attributable proportion due to interaction ( $AP = [OR_{11} - OR_{10} - OR_{01} + 1]/OR_{11}$ ), and the synergy index ( $SI = [OR_{11} - 1]/[OR_{01} - 1] + [OR_{10} - 1]$ ). If the interaction effect was not observed, the confidence interval of RERI and AP contained 0 and the confidence interval of S included 1.<sup>30</sup> The above indicators were calculated using an Excel table designed by Andersson et al.<sup>30</sup> All reported *P*-values were two-tailed, and a *P*-value of  $< 0.05$  was considered significant. Statistical analyses were performed using SPSS version 19.0 (SPSS Inc., Chicago, IL, USA).

## RESULTS

### LAP

According to Kahn's theory,<sup>13</sup> LAP was calculated as  $(WC - 60.6) \times (TG \text{ [mmol/L]})$  in males and  $(WC - 54.1) \times (TG \text{ [mmol/L]})$  in females based on the actual data obtained from the Southern Chinese population.<sup>22</sup>

1  
2  
3  
4  
5  
6  
7  
8  
9  
10  
11  
12  
13  
14  
15  
16  
17  
18  
19  
20  
21  
22  
23  
24  
25  
26  
27  
28  
29  
30  
31  
32  
33  
34  
35  
36  
37  
38  
39  
40  
41  
42  
43  
44  
45  
46  
47  
48  
49  
50  
51  
52  
53  
54  
55  
56  
57  
58  
59  
60

1     **Basic characteristics of the study participants**

2     A total number of 2079 of adults with an average age of 41.06 years were enrolled in

3     the present study, including 1002 males (48.29%) and 1077 females (51.80%). The

4     overall prevalence rates of normotension, prehypertension, and hypertension were

5     40.02%, 37.95%, and 22.03%, respectively. Male participants had a high prevalence

6     of prehypertension and hypertension than female participants ( $P < 0.001$ ). Statistically

7     significant differences in age ( $P < 0.001$ ), marital status ( $P < 0.001$ ), education level

8     ( $P < 0.001$ ), smoker ( $P < 0.001$ ), drinker ( $P < 0.001$ ), and family history of

9     hypertension ( $P = 0.005$ ) were observed between normotension, prehypertension, and

10    hypertension groups. However, no significant differences were observed in physical

11    activity ( $P = 0.550$ ) among the three groups. Anthropometric measurements found

12    significant differences in BMI ( $P < 0.001$ ), WC ( $P < 0.001$ ), WHR ( $P < 0.001$ ), LAP

13    ( $P < 0.001$ ) between the groups. Statistically significant differences found in

14    laboratory examinations including fasting plasma glucose ( $P < 0.001$ ), total

15    cholesterol ( $P < 0.001$ ), SBP ( $P < 0.001$ ), and DBP ( $P < 0.001$ ) between the groups

16    (Table 1). And the basic characteristics of different sex of study participants were

17    shown in table 2.

18    **LAP and the risk factors of hypertension**

19    In order to investigate the relationship between LAP and blood pressure, LAP was

20    divided into four groups by quartile in different sex (Table 3). A significant

21    association was observed between LAP and blood pressure in both male and female.

22    The results in males and females showed that SBP ( $P < 0.001$ ) and DBP ( $P < 0.001$ )

23    were relatively elevated in participants with higher LAP levels.

24    Multinomial logistic regression analysis was conducted to evaluate the association

25    between LAP quartiles and hypertension status (Table 4). Participants with the third

26    and the fourth quartile of LAP were more likely to develop prehypertension and

27    hypertension than those with the first quartile in both males and females.

28    After adjusting for age, marital status, and educational level, the risks of

prehypertension (adjusted OR: 3.14, 95% CI: 1.95–5.07) and hypertension (adjusted OR: 9.02; 95% CI: 5.11–15.93) significantly increased in male participants with the fourth quartile compared with those with the first quartile. For females, increasing risks of prehypertension (adjusted OR: 3.26, 95% CI: 2.09–5.10) and hypertension (adjusted OR: 6.32; 95% CI: 3.42–11.65) were observed in participants with the fourth LAP quartile compared with those with the first one.

After controlling for age, marital status, educational level, physical activity, smoking, alcohol consumption, BMI, WHR, fasting plasma glucose, and family history of hypertension, the risks of prehypertension (adjusted OR: 1.67, 95% CI: 0.96–2.92) and hypertension (adjusted OR: 2.79, 95% CI: 1.43–5.44) significantly increased in male participants with the fourth quartile compared with those with the first quartile. Meanwhile, increasing risks of prehypertension (adjusted OR: 2.10, 95% CI: 1.26–3.51) and hypertension (adjusted OR: 3.15, 95% CI: 1.56–6.39) were observed in female participants with the fourth LAP quartile compared with those with the first one.

The results of ROC curves analysis in males and females were shown in Figure. 1 and 2 and Table 5. LAP (AUC = 0.721; 95% CI: 0.680–0.761) was a better indicator to predict different types of hypertension than BMI (AUC = 0.698; 95% CI: 0.658–0.737), WHR (AUC = 0.684; 95% CI: 0.643–0.726) and TG (AUC = 0.663; 95% CI: 0.620–0.706) in females; however, WC (AUC = 0.734 95% CI: 0.700–0.769) performed better than BMI (AUC = 0.707, 95% CI: 0.672–0.742), WHR (AUC = 0.688; 95% CI: 0.650–0.725), LAP (AUC = 0.677; 95% CI: 0.640–0.713) and TG (AUC = 0.607; 95% CI: 0.568–0.646) on males. The best cut-off values of LAP to predict hypertension were 63.892 in males and 30.860 in females.

### **Interaction effects between LAP and family history of hypertension**

The interaction effects between LAP and family history of hypertension were presented in Table 6. Significant interaction effects between LAP and family history of hypertension were observed in males. The results of RERI (1.652; 95% CI: 0.267–3.037) and AP (0.516; 95% CI: 0.238–0.794) indicated a significant interaction

1  
2  
3  
4  
5  
6  
7  
8  
9  
10  
11  
12  
13  
14  
15  
16  
17  
18  
19  
20  
21  
22  
23  
24  
25  
26  
27  
28  
29  
30  
31  
32  
33  
34  
35  
36  
37  
38  
39  
40  
41  
42  
43  
44  
45  
46  
47  
48  
49  
50  
51  
52  
53  
54  
55  
56  
57  
58  
59  
60

effect of family history of hypertension and LAP on hypertension, but the result of SI (3.998; 95% CI: 0.897–17.820) did not.

However, no statistically significant interaction effects were found between LAP and family history of hypertension in females, which was indicated by all the three indicators. RERI was - 0.673 (95% CI: -2.566–1.220); AP was -0.328 (95% CI: -1.451–0.795); and SI was 0.610 (95% CI: 0.125–2.979).

**Discussion**

With the rapid development of the economy and sedentary lifestyle, elevated blood pressure has become a common and serious public health issue.<sup>31</sup> The prevalence of prehypertension and hypertension significantly increased.<sup>32</sup> Elevated blood pressure is caused by diverse factors, among which obesity is closely related to hypertension.<sup>33</sup> The prevalence of obesity increased by 13% in urban areas and by 85% in rural areas in China, thus more attention should be paid to this issue.<sup>17</sup> Extensive studies found that obesity, especially visceral adipose tissue, could strongly increase the blood pressure.<sup>33</sup>

The mechanisms underlying the interaction between obesity and hypertension are complicated. The mechanisms of obesity-induced hypertension include sodium retention, insulin resistance, activation of renin-angiotensin-aldosterone, altered vascular function, and secretion of relevant adipokines.<sup>34</sup> Besides, the mechanisms of blood pressure increase can be activated by visceral fat.<sup>35</sup>

Substantial evidence has shown that the harm of the fat accumulation is greater than the total amount of fat.<sup>36, 37</sup> However, traditional obesity indexes, such as BMI, WC, and WHR, have limitations of distinguishing differences between subcutaneous fat and visceral fat. Therefore, a new obesity index that can predict visceral fat easily and effectively is urgently needed. After Kahn first has shown that LAP performs better than BMI for recognizing the cardiovascular risk, domestic and foreign scholars pay increasing attention to LAP. LAP, a combination of WC and TG, is an accessible and inexpensive way to assess visceral fat.<sup>13</sup> It is a well-known fact that TG reflects

the degree of visceral fat accumulation and WC strongly associates with hypertension.<sup>12</sup> Notably, hypertriglyceridemic waist (HTGW) is also calculated based on the combination of TG and WC. However, LAP, as a continuous indicator, is superior to reflect visceral fat than HTGW,<sup>38</sup> a discontinuous indicator.<sup>21</sup> Therefore, LAP is used as a visceral obesity indicator in this study.

LAP is based on the hypothesis of minimum waist circumference includes the rachis, abdominal viscera and muscle.<sup>13</sup> Therefore, the differences between the actual WC and the minimum WC can represent abdominal adipose tissue.<sup>13</sup> Notably, LAP in almost all studies is calculated by data obtained based on the third National Health and Nutrition Examination Survey in the United States.<sup>13</sup> Because of differences in race, dietary habits, or lifestyle, individuals from different countries should have different visceral adipose tissues. It is shown that there are considerable differences in visceral adipose tissues between Chinese individuals and Europeans or Americans.<sup>39</sup> Therefore, LAP is calculated in our study using a modified formula so that it could apply to the individuals dwelling in Southern China.

As expected, a significant association is found between LAP and hypertension in the present study. Our findings are consistent with those in studies by Zhong et al,<sup>17</sup> Song et al,<sup>37</sup> and Shen et al,<sup>22</sup> all of which have demonstrated that LAP is an effective and reliable diagnostic indicator of hypertension. Participants with significantly higher LAP have higher risks of prehypertension and hypertension than those with lower LAP. Multinomial logistic regression analysis reveals that after adjusting for other factors, the risks of prehypertension and hypertension in the group with the highest LAP level are 2.10 and 3.15 times higher in females, respectively, than those in the group with the lowest LAP.

Wang et al. found LAP is a better index to predict the risk of hypertension.<sup>40</sup> However, Gao et al found that the performance of LAP is superior to that of BMI in male Mongolians;<sup>23</sup> these findings may be due to the apparently lower prevalence of high TG in female Mongolians than in male Mongolians (13.20% vs 23.10%,  $P < 0.05$ ), and the facts might disturb the association between LAP and hypertension in

1  
2  
3  
4  
5  
6  
7  
8  
9  
10  
11  
12  
13  
14  
15  
16  
17  
18  
19  
20  
21  
22  
23  
24  
25  
26  
27  
28  
29  
30  
31  
32  
33  
34  
35  
36  
37  
38  
39  
40  
41  
42  
43  
44  
45  
46  
47  
48  
49  
50  
51  
52  
53  
54  
55  
56  
57  
58  
59  
60

female Mongolians. Several studies finds the superiority of LAP over BMI for detection of hypertension and prehypertension in both genders.<sup>21, 37, 40</sup> However, in the present study, we also found that LAP perform better than BMI in female. According to Kahn,<sup>41</sup> the annual LAP changes are reduced at older age in male. Advancing age is associated with a progressive increase in systolic BP levels and with development and progression of arterial hypertension because of a number of factors, including atherosclerotic changes, large artery stiffening, altered renal function, and arterial baroreflex impairmen,<sup>42</sup> That is to say, increase in blood pressure is thought to be an unavoidable consequence of aging. Thus, the superiority of LAP for predicting hypertension in male may be disturbed by the larger-scale proportion of elder man (23.7%) in our study. In our study, LAP performs better in predicting the hypertension risk than TG in both sex. However, due to low predictive value of TG in southern China, LAP which combines of TG and WC is slightly inferior to WC.

In general, LAP, which applied to the Southern Chinese population, is a better indicator for predicting the hypertension risk in females in this study. In addition, large studies have demonstrated that family history of hypertension is a critical risk factor for hypertension, and individuals with family history of hypertension are 2–4 times more likely to develop hypertension than those without the family history of hypertension.<sup>43</sup> The interaction analysis in this study indicates the synergistic effect of LAP and family history on the hypertension risk in males, but no statistically significant differences in the interaction effect in females. These findings might be due to the fact there was no statistically significant difference between females and the family history of hypertension in our study ( $\chi^2=6.847$ ,  $P=0.0355>0.05$ ). In fact, cardiovascular events occur at a lower rate in females than in males.<sup>44</sup> In our study, the female participants who have both LAP and family history of hypertension are rarely observed and the prevalence rates of hypertension at a lower rate in females than in males no matter premenopausal status or menopausal status.<sup>45</sup> Our study suffers from a small sample size, especially in females. The fewer positive female observers which have higher LAP and family history of hypertension lead to no

1 statistically significant differences in the interaction effect on the hypertension risk in  
2 females. The interaction in female is not statistically significant, but their synergistic  
3 effect is obvious. The synergistic effect between family history of hypertension and  
4 LAP on the hypertension risk is demonstrated in our study as well as in other  
5 studies.<sup>21, 40</sup> Visceral obesity and family history of hypertension may result in  
6 increased blood pressure through some unknown mechanisms. However, further  
7 studies are needed to investigate the interaction effect between LAP and family  
8 history of hypertension on the hypertension risk.

9 To date, LAP is an inexpensive screening tool to identify visceral adipose tissue,  
10 and the method has high reproducibility. LAP, which is proposed by Kahn, is  
11 developed for the Western population. Thus this study explored the validity of LAP,  
12 which is calculated based on the Southern China population, and the interactive  
13 effects of LAP and family history of hypertension. The findings suggest LAP might  
14 perform better in predicting the hypertension risk than BMI, WHR and TG in  
15 Southern Chinese females. Furthermore, the interaction analysis in this study indicates  
16 the synergistic effect of LAP and family history on the hypertension risk. Although,  
17 the interaction in female is not statistically significant, their synergistic effect is  
18 obvious.

19 This study has some limitations. First of all, because this is a cross-sectional study,  
20 the present results are not sufficient to indicate causality. Secondly, the population of  
21 our study can partially represent the general population in the Southern China, but can  
22 not fully represent this region. Furthermore, this article lacks of adjustment for renal  
23 function, and other risk factors for hypertension (such as serum uric acid). Finally,  
24 because of the small sample size in this study, further studies with a larger sample size  
25 are needed to investigate whether the modified LAP applies to all the residents  
26 dwelling in Southern China.

## 27 CONCLUSION

28 In conclusion, LAP significantly associates with the hypertension risk, and higher  
29 LAP levels have relatively higher blood pressure. It has better performance than BMI,

1  
2  
3  
4  
5  
6  
7  
8  
9  
10  
11  
12  
13  
14  
15  
16  
17  
18  
19  
20  
21  
22  
23  
24  
25  
26  
27  
28  
29  
30  
31  
32  
33  
34  
35  
36  
37  
38  
39  
40  
41  
42  
43  
44  
45  
46  
47  
48  
49  
50  
51  
52  
53  
54  
55  
56  
57  
58  
59  
60

WHR, and TG on predicting hypertension risk of the Southern Chinese female population. Moreover, LAP and family history of hypertension might synergistically increase the risk of hypertension.

**Acknowledgements**

We gratefully acknowledge Dr. Pei-Xi Wang, Dr. Jin-Xiang Ma, Xin-Yu Bao, Yi-Xian Xie, Xiao-Xia Zhang, Xin Peng, Yan Liu and Meng-Jiao Cheng for their excellent work in study coordination, data collection, and management.

**Contributors**

Jun-Xuan Huang, Pei-Xi Wang and Jin-Xiang Ma conceived and designed the study. Jun-Xuan Huang, Xin-Yu Bao, Yi-Xian Xie, Xiao-Xia Zhang, Xin Peng, Yan Liu and Meng-Jiao Cheng contributed to collection of the data, analyzed the data and interpretation of the results. Jun-Xuan Huang wrote the draft manuscript. Jin-Xiang Ma, Pei-Xi Wang and Jun-Xuan Huang finalized the manuscript with inputs from all authors. All of the authors approved the final version submitted for publication.

**Funding**

This study was supported by Talent Introduction Fund of Guangzhou Medical University (2009).

**Competing interests**

The authors declared that they had no conflict of interest.

**Ethics statement**

This study was approved by the Ethics Committee of Guangzhou Medical University. Written informed consent was obtained from each study participant before investigation.

**Data sharing statement**

Our data might not be shared directly, because it's our team work and the data belongs to our team. Thus consent should be attained from team members.

**References**

1. Kearney PM, Whelton M, Reynolds K, et al. Global burden of hypertension:

- 1 analysis of worldwide data. *TheLancet* 2005;365(9455):217-223.  
2 doi:10.1016/S0140-6736(05)17741-1
- 3 2. Beaney T, Schutte AE, Tomaszewski M, et al. May Measurement Month 2017: an  
4 analysis of blood pressure screening results worldwide. *The Lancet Global*  
5 *Health* 2018;6(7):e736-e743. doi:10.1016/S2214-109X(18)30259-6
- 6 3. Bundy JD, He J. Hypertension and Related Cardiovascular Disease Burden in  
7 China. *Ann Glob Health* 2018;82(2):227-233. doi:10.1016/j.aogh.2016.02.002
- 8 4. Macia E, Gueye L, Duboz P. Hypertension and Obesity in Dakar, Senegal. *Plos*  
9 *One* 2016;11(9):e0161544. doi:10.1371/journal.pone.0161544
- 10 5. Tang L, Zhang F, Tong N. The association of visceral adipose tissue and  
11 subcutaneous adipose tissue with metabolic risk factors in a large population of  
12 Chinese adults. *Clin Endocrinol* 2016;85(1):46-53. doi:10.1111/cen.13013
- 13 6. Wandeler G, Paccaud F, Vollenweider P, et al. Strength of Family History in  
14 Predicting Levels of Blood Pressure, Plasma Glucose and Cholesterol. *Public*  
15 *Health Genom* 2010;13(3):143-154. doi:10.1159/000233228
- 16 7. Liu M, He Y, Jiang B, et al. Association Between Family History and  
17 Hypertension Among Chinese Elderly. *Medicine* 2015;94(48):e2226.  
18 doi:10.1097/MD.0000000000002226
- 19 8. Al-Safi SA, Aboul-Enein FH, Aboul-Enein BH, et al. Influence of family history  
20 and lifestyle on blood pressure and heart rate in young adults in Jordan. *Public*  
21 *Health* 2006;120(11):1027-1032. doi:10.1016/j.puhe.2006.06.009
- 22 9. Alhawari HH, Al-Shelleh S, Alhawari HH, et al. Blood Pressure and Its  
23 Association with Gender, Body Mass Index, Smoking, and Family History  
24 among University Students. *Int J Hypertens* 2018;2018:1-5.  
25 doi:10.1155/2018/4186496
- 26 10. Ibrahim MM. Subcutaneous and visceral adipose tissue: structural and functional  
27 differences. *Obes Rev* 2010;11(1):11-18. doi:10.1111/j.1467-789X.2009.00623.x
- 28 11. Chen W, Wilson JL, Khaksari M, et al. Abdominal fat analyzed by DEXA scan  
29 reflects visceral body fat and improves the phenotype description and the  
30 assessment of metabolic risk in mice. *Am J Physiol-Endoc M*

- 2012;303(5):E635-E643. doi:10.1152/ajpendo.00078.2012
12. Nurdiantami Y, Watanabe K, Tanaka E, et al. Association of general and central obesity with hypertension. *Clin Nutr* 2018;37(4):1259-1263. doi:10.1016/j.clnu.2017.05.012
13. Kahn HS. The "lipid accumulation product" performs better than the body mass index for recognizing cardiovascular risk: a population-based comparison. *Bmc Cardiovasc Disor* 2005;5(1):26-26. doi:10.1186/1471-2261-5-26
14. Ray L, Ravichandran K, Nanda SK. Comparison of Lipid Accumulation Product Index with Body Mass Index and Waist Circumference as a Predictor of Metabolic Syndrome in Indian Population. *Metab Syndr Relat D* 2018;16(5):240-245. doi:10.1089/met.2017.0119
15. Cicero A F G, Gitto S, Fogacci F, et al. Fatty liver index is associated to pulse wave velocity in healthy subjects: Data from the Brisighella Heart Study. *European Journal of Internal Medicine* 2018:S0953620518301262. doi:10.1097/01.hjr.0000136566.89429.63
16. Lee JW, Lim NK, Park HY. The product of fasting plasma glucose and triglycerides improves risk prediction of type 2 diabetes in middle-aged Koreans. *Bmc Endocr Disord* 2018;18(1):33. doi:10.1186/s12902-018-0259-x
17. Zhong C, Xia W, Zhong X, et al. Lipid Accumulation Product and Hypertension Related to Stroke: a 9.2-Year Prospective Study Among Mongolians in China. *J Atheroscler Thromb* 2016;23(7):830-838. doi:10.5551/jat.33514
18. Cicero A F G, D'Addato S, Reggi A, et al. Gender Difference in Hepatic Steatosis Index and Lipid Accumulation Product Ability to Predict Incident Metabolic Syndrome in the Historical Cohort of the Brisighella Heart Study. *Metabolic Syndrome and Related Disorders* 2013; 11(6):412-416.
19. Wakabayashi I. Associations of Blood Lipid-Related Indices with Blood Pressure and Pulse Pressure in Middle-Aged Men. *Metab Syndr Relat D* 2015;13(1):22-28. doi:10.1089/met.2014.0093
20. de Oliveira CC, Roriz AKC, Ramos LB, et al. Indicators of Adiposity Predictors of Metabolic Syndrome in the Elderly. *Ann Nutr Metab* 2017;70(1):9-15.

- doi:10.1159/000455333
21. Song J, Chen X, Zhao Y, et al. Risk factors for prehypertension and their interactive effect: a cross-sectional survey in China. *Bmc Cardiovasc Disor* 2018;18(1). doi:10.1186/s12872-018-0917-y
  22. Shen YY, Chen JC, Li G, et al. Relationship of lipid accumulation product with hypertension and diabetes among Beijing residents study. *Zhonghua yu fang yi xue za zhi [Chinese journal of preventive medicine]* 2017;51(5):415.
  23. Gao X, Wang G, Wang A, et al. Comparison of lipid accumulation product with body mass index as an indicator of hypertension risk among Mongolians in China. *Obes Res Clin Pract* 2013;7(4):e308-e314. doi:10.1016/j.orcp.2012.02.002
  24. Song F, Cho M S. Geography of Food Consumption Patterns between South and North China. *Foods* 2017;6(5). doi:10.3390/foods6050034.
  25. Huang Z, Wu X, Stamler J, et al. A north-south comparison of blood pressure and factors related to blood pressure in the People's Republic of China: a report from the PRC-USA Collaborative Study of Cardiovascular Epidemiology. *Journal of Hypertension* 1994; 12(9):1103-12.
  26. Wu Z, Yao C, Zhao D, et al. Cardiovascular disease risk factor levels and their relations to CVD rates in China--results of Sino-MONICA project. *European Journal of Cardiovascular Prevention & Rehabilitation* 2004; 11(4):275-283.
  27. Zhao L, Stamler J, Yan L L, et al. Blood Pressure Differences Between Northern and Southern Chinese: Role of Dietary Factors The International Study on Macronutrients and Blood Pressure. *Hypertension* 2004; 43(6):1332-1337.
  28. Rosenberg DE, Bull FC, Marshall AL, Sallis JF, Bauman AE. Assessment of sedentary behavior with the international physical activity questionnaire. *J Phys Act Health*. 2008;5:S30-44.
  29. Zhang M, Batu B, Tong W, et al. Prehypertension and Cardiovascular Risk Factor Clustering Among Mongolian Population in Rural and Animal Husbandry Area, Inner Mongolia, China. *Circ J* 2009;73(8):1437-1441. doi:10.1253/circj.CJ-09-0101

1  
2  
3  
4  
5  
6  
7  
8  
9  
10  
11  
12  
13  
14  
15  
16  
17  
18  
19  
20  
21  
22  
23  
24  
25  
26  
27  
28  
29  
30  
31  
32  
33  
34  
35  
36  
37  
38  
39  
40  
41  
42  
43  
44  
45  
46  
47  
48  
49  
50  
51  
52  
53  
54  
55  
56  
57  
58  
59  
60

30. Andersson T, Alfredsson L, Källberg H, et al. Calculating measures of biological interaction. *Eur J Epidemiol* 2005;20(7):575-579. doi:10.1007/s10654-005-7835-x

31. Lackland DT, Beilin LJ, Campbell NRC, et al. Global Implications of Blood Pressure Thresholds and Targets. *Hypertension* 2018;71(6):985-987. doi:10.1161/HYPERTENSIONAHA.118.11280

32. Wang Z, Zeng X, Chen Z, et al. Association of visceral and total body fat with hypertension and prehypertension in a middle-aged Chinese population. *J Hypertens* 2015;33(8):1555-62. doi:10.1097/HJH.0000000000000602

33. Stabouli S, Papakatsika S, Kotsis V. The role of obesity, salt and exercise on blood pressure in children and adolescents. *Expert Rev Cardiovasc Ther* 2011;9(6):753-61. doi:10.1586/erc.11.63

34. Kotchen TA. Obesity-Related Hypertension: Epidemiology, Pathophysiology, and Clinical Management. *Am J Hypertens* 2010;23(11):1170-1178. doi:10.1038/ajh.2010.172

35. Boscaro M, Giacchetti G, Ronconi V. Visceral adipose tissue: emerging role of gluco- and mineralocorticoid hormones in the setting of cardiometabolic alterations: Adipose tissue and adrenal hormones. *Ann Ny Acad Sci* 2012;1264(1):87-102. doi:10.1111/j.1749-6632.2012.06597.x

36. Li Y, Bujo H, Takahashi K, et al. Visceral fat: higher responsiveness of fat mass and gene expression to calorie restriction than subcutaneous fat. *Exp Biol Med (Maywood)* 2003;228(10):1118-23.

37. Song J, Zhao Y, Nie S, et al. The effect of lipid accumulation product and its interaction with other factors on hypertension risk in Chinese Han population: A cross-sectional study. *Plos One* 2018;13(6):e0198105. doi:10.1371/journal.pone.0198105

38. Janghorbani M, Aminorroaya A, Amini M. Comparison of Different Obesity Indices for Predicting Incident Hypertension. *High Blood Pressure & Cardiovascular Prevention* 2017;24(2):157-166. doi:10.1007/s40292-017-0186-3

39. Nazare J, Smith JD, Borel A, et al. Ethnic influences on the relations between

- abdominal subcutaneous and visceral adiposity, liver fat, and cardiometabolic risk profile: the International Study of Prediction of Intra-Abdominal Adiposity and Its Relationship With Cardiometabolic Risk/Intra-Abdominal Adiposity. *The American Journal of Clinical Nutrition* 2012;96(4):714-726. doi:10.3945/ajcn.112.035758
40. Wang H, Chen Y, Sun G, et al. Validity of cardiometabolic index, lipid accumulation product, and body adiposity index in predicting the risk of hypertension in Chinese population. *Postgraduate Medicine* 2018;130(3):325-333. doi:10.1080/00325481.2018.1444901
41. Kahn H S, Cheng Y J. Longitudinal changes in BMI and in an index estimating excess lipids among white and black adults in the United States. *Int J Obes* 2008; 32(1):136-143.
42. Pinto E. Blood pressure and ageing. *Postgrad Med J* 2007; Feb;83(976):109-14. doi: 10.1136/pgmj.2006.048371
43. TOZAWA M, OSHIRO S, ISEKI C, et al. Family History of Hypertension and Blood Pressure in a Screened Cohort. *Hypertens Res* 2001;24(2):93-98. doi:10.1291/hypres.24.93
44. Doumas M, Papademetriou V, Faselis C, et al. Gender Differences in Hypertension: Myths and Reality. *Curr Hypertens Rep* 2013;15(4):321-330. doi:10.1007/s11906-013-0359-y
45. Ramezani TF, Behboudi-Gandevani S, Ghanbarian A, et al. Effect of menopause on cardiovascular disease and its risk factors: a 9-year follow-up study. *Climacteric*. 2014 Apr;17(2):164-72. doi: 10.3109/13697137.2013.828197.

## The titles and legends of figure

### Title

**Fig.1** The ROC curve of different obesity indexes in predicting hypertension in males.

### legend

LAP: lipid accumulation product; BMI: body mass index; WHR: waist-hip ratio; WC: waist circumference; TG: Triglyceride.

1  
2  
3  
4  
5  
6  
7  
8  
9  
10  
11  
12  
13  
14  
15  
16  
17  
18  
19  
20  
21  
22  
23  
24  
25  
26  
27  
28  
29  
30  
31  
32  
33  
34  
35  
36  
37  
38  
39  
40  
41  
42  
43  
44  
45  
46  
47  
48  
49  
50  
51  
52  
53  
54  
55  
56  
57  
58  
59  
60

1

2     **Title**

3     **Fig.2** The ROC curve of different obesity indexes in predicting hypertension in  
4     females.

5     **legend**

6     LAP: lipid accumulation product; BMI: body mass index; WHR: waist-hip ratio; WC:  
7     waist circumference; TG: Triglyceride.

**Table 1** Basic characteristics of the participants

| Variables                     | Normotension<br>(N = 832) | Prehypertension<br>(N = 789) | Hypertension<br>(N = 458) | $\chi^2 / Z$ | P-value |
|-------------------------------|---------------------------|------------------------------|---------------------------|--------------|---------|
| Sex (%)                       |                           |                              |                           | 135.625      | < 0.001 |
| Male                          | 32.57                     | 58.68                        | 58.52                     |              |         |
| Female                        | 67.43                     | 41.32                        | 41.48                     |              |         |
| Age (years)                   | 36.42 ± 10.59             | 41.38 ± 12.71                | 48.93 ± 12.75             | 267.206      | < 0.001 |
| Marital status (%)            |                           |                              |                           | 21.287       | < 0.001 |
| Currently not married         | 23.20                     | 18.76                        | 12.66                     |              |         |
| Currently married             | 76.80                     | 81.24                        | 87.34                     |              |         |
| Education level (%)           |                           |                              |                           | 101.355      | < 0.001 |
| Elementary school and lower   | 15.87                     | 21.55                        | 36.46                     |              |         |
| Secondary school              | 36.30                     | 38.53                        | 39.96                     |              |         |
| Senior high school and higher | 47.83                     | 39.92                        | 23.58                     |              |         |
| Physical activity (%)         |                           |                              |                           | 2.688        | 0.611   |

1  
2  
3  
4  
5  
6  
7  
8  
9  
10  
11  
12  
13  
14  
15  
16  
17  
18  
19  
20  
21  
22  
23  
24  
25  
26  
27  
28  
29  
30  
31  
32  
33  
34  
35  
36  
37  
38  
39  
40  
41  
42  
43  
44  
45  
46

|                 |       |       |       |         |         |
|-----------------|-------|-------|-------|---------|---------|
| Seldom or never | 35.70 | 34.22 | 31.22 |         |         |
| Moderate        | 17.43 | 18.25 | 18.78 |         |         |
| High            | 46.87 | 47.53 | 50.00 |         |         |
| Smoker (%)      |       |       |       | 50.346  | < 0.001 |
| Non-smoker      | 82.25 | 71.61 | 67.90 |         |         |
| Smoker          | 16.18 | 26.87 | 28.61 |         |         |
| Former smoker   | 0.97  | 1.52  | 3.49  |         |         |
| Drinker (%)     |       |       |       | 30.865  | < 0.001 |
| Non-drinker     | 84.11 | 76.34 | 72.53 |         |         |
| Drinker         | 14.91 | 22.39 | 24.62 |         |         |
| Former drinker  | 0.98  | 1.27  | 2.85  |         |         |
| BMI             |       |       |       | 255.012 | < 0.001 |
| < 18.5          | 13.70 | 5.20  | 2.18  |         |         |
| 18.5–23.9       | 68.51 | 54.88 | 41.70 |         |         |
| 24–27.9         | 14.30 | 31.69 | 37.55 |         |         |

|                                    |               |               |                |          |         |
|------------------------------------|---------------|---------------|----------------|----------|---------|
| ≥ 28                               | 3.49          | 8.24          | 18.56          |          |         |
| WC                                 | 75.61±8.19    | 81.61±9.04    | 87.02±9.95     | 411.441  | < 0.001 |
| WHR                                | 0.85± 0.06    | 0.88± 0.07    | 0.91± 0.06     | 248.475  | < 0.001 |
| Fasting plasma glucose (mmol/L)    | 4.69 ± 0.82   | 4.98 ± 1.33   | 5.31 ± 1.86    | 90.399   | < 0.001 |
| Total cholesterol (mmol/L)         | 4.70 ± 0.96   | 4.98 ± 1.07   | 5.26 ± 1.15    | 88.325   | < 0.001 |
| Triglyceride (mmol/L)              | 1.26 ± 0.83   | 1.77 ± 1.77   | 2.15 ± 2.25    | 178.995  | < 0.001 |
| Systolic blood pressure (mmHg)     | 107.97 ± 7.80 | 125.45 ± 6.65 | 144.78 ± 18.55 | 1533.137 | < 0.001 |
| Diastolic blood pressure (mmHg)    | 69.49 ± 6.40  | 79.59 ± 5.99  | 91.49 ± 11.33  | 1206.505 | < 0.001 |
| Family history of hypertension (%) |               |               |                | 18.391   | 0.005   |
| Only father                        | 11.42         | 11.03         | 11.14          |          |         |
| Only mother                        | 12.02         | 15.08         | 17.25          |          |         |
| Both parents                       | 5.41          | 4.82          | 8.95           |          |         |
| Neither                            | 71.15         | 69.07         | 62.66          |          |         |
| LAP                                | 29.14 ± 27.00 | 52.15 ± 63.50 | 75.87 ± 99.81  | 355.133  | < 0.001 |

1 BMI: body mass index; WC: waist circumference; WHR: waist-hip rate; LAP: lipid accumulation product.

1     **Table 2** Basic characteristics of the participants

| Male                          |                           |                              |                           |              |         | Female                    |                              |                           |              |         |
|-------------------------------|---------------------------|------------------------------|---------------------------|--------------|---------|---------------------------|------------------------------|---------------------------|--------------|---------|
| Variables                     | Normotension<br>(N = 271) | Prehypertension<br>(N = 463) | Hypertension<br>(N = 268) | $\chi^2 / Z$ | P-value | Normotension<br>(N = 561) | Prehypertension<br>(N = 326) | Hypertension<br>(N = 190) | $\chi^2 / Z$ | P-value |
| Age (years)                   | 36.57 ± 11.02             | 39.90 ± 12.37                | 47.15 ± 12.95             | 91.532       | < 0.001 | 36.35 ± 10.39             | 43.48 ± 12.92                | 51.43 ± 12.11             | 201.378      | < 0.001 |
| Marital status (%)            |                           |                              |                           | 26.019       | < 0.001 |                           |                              |                           | 7.928        | 0.019   |
| Currently not married         | 31.37                     | 22.46                        | 13.06                     |              |         | 19.25                     | 13.50                        | 12.11                     |              |         |
| Currently married             | 68.63                     | 77.54                        | 86.94                     |              |         | 80.75                     | 86.50                        | 87.89                     |              |         |
| Education level (%)           |                           |                              |                           | 24.179       | < 0.001 |                           |                              |                           | 116.258      | < 0.001 |
| Elementary school and lower   | 15.13                     | 15.33                        | 25.00                     |              |         | 16.22                     | 30.37                        | 52.63                     |              |         |
| Secondary school              | 37.64                     | 40.39                        | 45.15                     |              |         | 35.65                     | 35.89                        | 32.63                     |              |         |
| Senior high school and higher | 47.23                     | 44.28                        | 29.85                     |              |         | 48.13                     | 33.74                        | 14.74                     |              |         |
| Physical activity (%)         |                           |                              |                           | 0.807        | 0.668   |                           |                              |                           | 2.979        | 0.226   |
| insufficiently active         | 58.30                     | 56.16                        | 54.48                     |              |         | 50.62                     | 47.24                        | 43.68                     |              |         |

|                     |            |            |            |         |         |            |            |             |         |         |
|---------------------|------------|------------|------------|---------|---------|------------|------------|-------------|---------|---------|
| sufficiently active | 41.70      | 43.84      | 45.52      |         |         | 49.38      | 52.76      | 56.32       |         |         |
| Smoker (%)          |            |            |            | 7.037   | 0.132   |            |            |             | 5.893   | 0.122   |
| Non-smoker          | 47.78      | 52.27      | 46.27      |         |         | 99.82      | 99.08      | 99.42       |         |         |
| Smoker              | 49.26      | 45.36      | 48.13      |         |         | 0.18       | 0.61       | 1.05        |         |         |
| Former smoker       | 2.96       | 2.38       | 5.60       |         |         | 0.00       | 0.31       | 0.53        |         |         |
| Drinker (%)         |            |            |            | 3.790   | 0.432   |            |            |             | 4.993   | 0.255   |
| Non-drinker         | 60.74      | 61.47      | 57.30      |         |         | 95.62      | 97.53      | 94.15       |         |         |
| Drinker             | 36.67      | 36.36      | 38.20      |         |         | 4.20       | 2.47       | 5.32        |         |         |
| Former drinker      | 2.59       | 2.16       | 4.49       |         |         | 0.18       | 0.00       | 0.53        |         |         |
| BMI                 |            |            |            | 148.700 | < 0.001 |            |            |             | 99.205  | < 0.001 |
| < 18.5              | 16.61      | 4.54       | 1.49       |         |         | 12.30      | 6.13       | 3.16        |         |         |
| 18.5–23.9           | 65.68      | 54.64      | 38.43      |         |         | 69.88      | 55.21      | 46.32       |         |         |
| 24–27.9             | 14.39      | 33.26      | 39.18      |         |         | 14.26      | 29.45      | 35.26       |         |         |
| ≥ 28                | 3.32       | 7.56       | 20.90      |         |         | 3.57       | 9.20       | 15.26       |         |         |
| WC                  | 77.26±7.85 | 82.95±8.49 | 88.71±9.43 | 193.623 | < 0.001 | 74.82±8.24 | 79.72±9.46 | 84.63±10.20 | 154.819 | < 0.001 |

|                                    |               |               |                |         |         |               |               |               |         |         |
|------------------------------------|---------------|---------------|----------------|---------|---------|---------------|---------------|---------------|---------|---------|
| WHR                                | 0.86±0.06     | 0.89±0.06     | 0.92±0.06      | 126.195 | < 0.001 | 0.84±0.07     | 0.86±0.07     | 0.89±0.06     | 183.524 | < 0.001 |
| Fasting plasma glucose (mmol/L)    | 4.76 ± 1.08   | 4.98 ± 1.38   | 5.30 ± 1.94    | 24.275  | < 0.001 | 4.65 ± 0.66   | 4.99 ± 1.26   | 5.31 ± 1.75   | 71.169  | < 0.001 |
| Total cholesterol (mmol/L)         | 4.73 ± 1.00   | 4.98 ± 1.06   | 5.17 ± 1.25    | 20.500  | < 0.001 | 4.69 ± 0.94   | 4.98 ± 1.08   | 5.39 ± 0.98   | 73.075  | < 0.001 |
| Triglyceride (mmol/L)              | 1.54 ± 1.08   | 1.93 ± 1.94   | 2.38 ± 2.68    | 40.974  | < 0.001 | 1.12 ± 0.64   | 1.54 ± 1.47   | 1.82 ± 1.40   | 90.583  | < 0.001 |
| Systolic blood pressure (mmHg)     | 110.52 ± 6.13 | 125.60 ± 6.54 | 145.64 ± 17.04 | 706.430 | < 0.001 | 106.73 ± 8.21 | 125.23 ± 6.81 | 143.57± 20.48 | 755.356 | < 0.001 |
| Diastolic blood pressure (mmHg)    | 70.82 ± 5.79  | 80.27 ± 5.75  | 93.11 ± 10.66  | 592.747 | < 0.001 | 68.84 ± 6.59  | 78.63 ± 6.19  | 89.20 ± 11.87 | 553.348 | < 0.001 |
| Family history of hypertension (%) |               |               |                | 16.427  | 0.012   |               |               |               | 6.847   | 0.335   |
| Only father                        | 10.70         | 11.23         | 13.81          |         |         | 11.76         | 10.74         | 7.37          |         |         |
| Only mother                        | 11.44         | 17.28         | 18.28          |         |         | 12.30         | 11.96         | 15.79         |         |         |
| Both parents                       | 6.27          | 4.75          | 9.70           |         |         | 4.99          | 4.91          | 7.89          |         |         |
| Neither                            | 71.59         | 66.74         | 58.21          |         |         | 70.94         | 72.39         | 68.95         |         |         |
| LAP                                | 38.69 ± 34.85 | 58.43 ± 65.52 | 87.83 ± 120.94 | 113.508 | < 0.001 | 24.52 ± 20.75 | 43.24 ± 59.48 | 58.98 ± 54.19 | 159.320 | < 0.001 |

BMI: body mass index; WC: waist circumference; WHR: waist-hip rate; LAP: lipid accumulation product.

**Table 3** Comparison of blood pressure among four quartiles of LAP

| Variables                       | LAP            |                |                |                | Z       | P-value |
|---------------------------------|----------------|----------------|----------------|----------------|---------|---------|
|                                 | Q1             | Q2             | Q3             | Q4             |         |         |
| Male                            |                |                |                |                |         |         |
| Systolic blood pressure (mmHg)  | 119.33 ± 13.72 | 125.61 ± 14.86 | 129.23 ± 16.38 | 133.36 ± 17.85 | 106.793 | < 0.001 |
| Diastolic blood pressure (mmHg) | 75.84 ± 9.89   | 80.55 ± 9.84   | 82.56 ± 10.74  | 85.64 ± 11.36  | 106.285 | < 0.001 |
| Female                          |                |                |                |                |         |         |
| Systolic blood pressure (mmHg)  | 110.45 ± 13.91 | 114.95 ± 15.07 | 119.66 ± 15.91 | 130.25 ± 19.78 | 184.926 | < 0.001 |
| Diastolic blood pressure (mmHg) | 71.05 ± 9.45   | 73.29 ± 9.60   | 76.21 ± 9.96   | 81.04 ± 11.70  | 134.730 | < 0.001 |

**Table 4** Multinomial logistic regression analysis of LAP associated with hypertension status

| Quartiles of LAP | OR <sup>a</sup> (95% CI) |                           | OR <sup>b</sup> (95% CI) |                          | OR <sup>c</sup> (95% CI) |                         |
|------------------|--------------------------|---------------------------|--------------------------|--------------------------|--------------------------|-------------------------|
|                  | prehypertension          | hypertension              | prehypertension          | hypertension             | prehypertension          | hypertension            |
| Male             |                          |                           |                          |                          |                          |                         |
| Q1               | 1 (reference)            | 1 (reference)             | 1 (reference)            | 1 (reference)            | 1 (reference)            | 1 (reference)           |
| Q2               | 2.98***<br>(1.88, 4.72)  | 4.70***<br>(2.34, 9.45)   | 2.22***<br>(1.48, 3.34)  | 2.38**<br>(1.36, 4.16)   | 1.73*<br>(1.12, 2.67)    | 1.61<br>(0.89, 2.94)    |
| Q3               | 4.48***<br>(2.85, 7.03)  | 8.26***<br>(4.21, 16.21)  | 2.68***<br>(1.74, 4.12)  | 3.90***<br>(2.24, 6.82)  | 1.66*<br>(1.03, 2.68)    | 1.75<br>(0.94, 3.26)    |
| Q4               | 4.65***<br>(2.93, 7.36)  | 17.82***<br>(9.21, 34.46) | 3.14***<br>(1.95, 5.07)  | 9.02***<br>(5.11, 15.93) | 1.67<br>(0.96, 2.92)     | 2.79***<br>(1.43, 5.44) |
| Female           |                          |                           |                          |                          |                          |                         |
| Q1               | 1 (reference)            | 1 (reference)             | 1 (reference)            | 1 (reference)            | 1 (reference)            | 1 (reference)           |
| Q2               | 1.75**<br>(1.22, 2.51)   | 2.19**<br>(1.27, 3.77)    | 1.046<br>(0.69,1.58)     | 1.19<br>(0.62,2.29)      | 0.91<br>(0.59,1.41)      | 1.015<br>(0.51,2.03)    |

|    |                         |                            |                         |                          |                        |                         |
|----|-------------------------|----------------------------|-------------------------|--------------------------|------------------------|-------------------------|
| Q3 | 3.35***<br>(2.27, 4.93) | 6.50***<br>(3.83, 11.02)   | 1.68**<br>(1.11, 2.52)  | 1.87<br>(0.99, 3.49)     | 1.31<br>(0.84, 2.05)   | 1.19<br>(0.60, 2.38)    |
| Q4 | 5.99***<br>(3.74, 9.59) | 20.06***<br>(11.37, 35.38) | 3.26***<br>(2.09, 5.10) | 6.32***<br>(3.42, 11.65) | 2.10**<br>(1.26, 3.51) | 3.15***<br>(1.56, 6.39) |

OR=Odds ratio; CI=confidence interval; \*\*\*,  $P < 0.001$ ; \*\*,  $P < 0.01$ ; \*,  $P < 0.05$ .

<sup>a</sup>, unadjusted.

<sup>b</sup>, adjusted for age, sex, marital status, educational level

<sup>c</sup>, adjusted for physical activity, smoker, drinker, BMI, WHR, fasting plasma glucose, family history of hypertension, and all the factors in b.

**Table 5** Predicting hypertension by different obesity indexes

| Variables   | Cut-off value | Sensitivity (%) | Specificity (%) | Youden Index | AUC(95% CI)          | P-value |
|-------------|---------------|-----------------|-----------------|--------------|----------------------|---------|
| <b>Male</b> |               |                 |                 |              |                      |         |
| BMI         | 23.004        | 73.51           | 58.08           | 0.316        | 0.707 (0.672, 0.742) | < 0.001 |
| WHR         | 0.906         | 58.58           | 70.27           | 0.289        | 0.688 (0.650, 0.725) | < 0.001 |
| LAP         | 63.892        | 49.63           | 76.99           | 0.266        | 0.677 (0.640, 0.713) | < 0.001 |

|        |        |       |       |       |                      |         |
|--------|--------|-------|-------|-------|----------------------|---------|
| WC     | 85.05  | 65.67 | 72.60 | 0.383 | 0.734 (0.700, 0.769) | < 0.001 |
| TG     | 1.91   | 46.27 | 70.14 | 0.164 | 0.607 (0.568, 0.646) | < 0.001 |
| Female |        |       |       |       |                      |         |
| BMI    | 21.767 | 81.58 | 50.73 | 0.323 | 0.698 (0.658, 0.737) | < 0.001 |
| WHR    | 0.860  | 74.21 | 55.24 | 0.294 | 0.684 (0.643, 0.726) | < 0.001 |
| LAP    | 30.860 | 68.95 | 67.42 | 0.363 | 0.721 (0.680, 0.761) | < 0.001 |
| WC     | 79.90  | 72.11 | 64.94 | 0.370 | 0.725 (0.686, 0.766) | < 0.001 |
| TG     | 1.26   | 63.68 | 64.49 | 0.282 | 0.663 (0.620, 0.706) | < 0.001 |

BMI: body mass index; WHR: waist-hip rate; LAP: lipid accumulation product; WC: waist circumference; TG: Triglyceride; AUC: area under curve;  
OR=Odds ratio; CI=confidence interval.

**Table 6** Interaction effects between LAP and family history of hypertension

| Variables | Variables | N | OR <sup>c</sup> (95% CI) | Interaction indexes (95% CI) |
|-----------|-----------|---|--------------------------|------------------------------|
|-----------|-----------|---|--------------------------|------------------------------|

**Male**

LAP<sup>a</sup>      Family history<sup>b</sup>

|                  |                             |     |                         |                               |
|------------------|-----------------------------|-----|-------------------------|-------------------------------|
| -                | -                           | 486 | 1 (reference)           | RERI = 1.652 (0.267, 3.037)*  |
| -                | +                           | 215 | 1.189 (0.772, 1.832)    | AP = 0.516 (0.238, 0.794)*    |
| +                | -                           | 173 | 1.362 (0.875, 2.121)    | SI = 3.998 (0.897, 17.820)    |
| +                | +                           | 128 | 3.203*** (2.002, 5.124) |                               |
| <b>Female</b>    |                             |     |                         |                               |
| LAP <sup>a</sup> | Family history <sup>b</sup> |     |                         |                               |
| -                | -                           | 657 | 1 (reference)           | RERI = -0.673 (-2.566, 1.220) |
| -                | +                           | 276 | 1.995** (1.284, 3.099)  | AP = -0.328 (-1.451, 0.795)   |
| +                | -                           | 108 | 1.729* (1.023, 2.922)   | SI = 0.610 (0.125, 2.979)     |
| +                | +                           | 36  | 2.051 (0.919, 4.589)    |                               |

LAP: lipid accumulation production; RERI: relative excess risk of interaction ; AP: attributable proportion due to interaction; SI: synergy index; OR=Odds ratio; CI=confidence interval; \*\*\*,  $P < 0.001$ ; \*\*,  $P < 0.01$ ; \*,  $P < 0.05$ .

<sup>a</sup>, grouped by the cut-off values in Table 4.

<sup>b</sup>, family history of hypertension was defined as one parent or both parents having hypertension.

<sup>c</sup>, adjusted for age, marital status, educational level, physical activity, smoker, drinker, BMI, and WHR.



Fig.1 The ROC curve of different obesity indexes in predicting hypertension in males.  
legend  
LAP: lipid accumulation product; BMI: body mass index; WHR: waist-hip ratio; WC: waist circumference;  
TG: Triglyceride.



Fig.2 The ROC curve of different obesity indexes in predicting hypertension in females. legend LAP: lipid accumulation product; BMI: body mass index; WHR: waist-hip ratio; WC: waist circumference; TG: Triglyceride.

STROBE 2007 (v4) Statement—Checklist of items that should be included in reports of *cross-sectional studies*

| Section/Topic             | Item # | Recommendation                                                                                                                                                                       | Reported on page # |
|---------------------------|--------|--------------------------------------------------------------------------------------------------------------------------------------------------------------------------------------|--------------------|
| Title and abstract        | 1      | (a) Indicate the study’s design with a commonly used term in the title or the abstract                                                                                               | Page 1             |
|                           |        | (b) Provide in the abstract an informative and balanced summary of what was done and what was found                                                                                  | Page 2             |
| Introduction              |        |                                                                                                                                                                                      |                    |
| Background/rationale      | 2      | Explain the scientific background and rationale for the investigation being reported                                                                                                 | Page 4-5           |
| Objectives                | 3      | State specific objectives, including any prespecified hypotheses                                                                                                                     | Page 5             |
| Methods                   |        |                                                                                                                                                                                      |                    |
| Study design              | 4      | Present key elements of study design early in the paper                                                                                                                              | Page 5             |
| Setting                   | 5      | Describe the setting, locations, and relevant dates, including periods of recruitment, exposure, follow-up, and data collection                                                      | Page 5             |
| Participants              | 6      | (a) Give the eligibility criteria, and the sources and methods of selection of participants                                                                                          | Page 5-6           |
| Variables                 | 7      | Clearly define all outcomes, exposures, predictors, potential confounders, and effect modifiers. Give diagnostic criteria, if applicable                                             | Page 6-7           |
| Data sources/ measurement | 8*     | For each variable of interest, give sources of data and details of methods of assessment (measurement). Describe comparability of assessment methods if there is more than one group | Page 6-7           |
| Bias                      | 9      | Describe any efforts to address potential sources of bias                                                                                                                            | Page 3             |

|                        |     |                                                                                                                                                                                                              |                                       |
|------------------------|-----|--------------------------------------------------------------------------------------------------------------------------------------------------------------------------------------------------------------|---------------------------------------|
| Study size             | 10  | Explain how the study size was arrived at                                                                                                                                                                    | Page 6                                |
| Quantitative variables | 11  | Explain how quantitative variables were handled in the analyses. If applicable, describe which groupings were chosen and why                                                                                 | Page 7-8                              |
| Statistical methods    | 12  | (a) Describe all statistical methods, including those used to control for confounding                                                                                                                        | Page 7-8                              |
|                        |     | (b) Describe any methods used to examine subgroups and interactions                                                                                                                                          | Page 7-8                              |
|                        |     | (c) Explain how missing data were addressed                                                                                                                                                                  | Page 5                                |
|                        |     | (d) If applicable, describe analytical methods taking account of sampling strategy                                                                                                                           | Page 5                                |
|                        |     | (e) Describe any sensitivity analyses                                                                                                                                                                        | Not applicable                        |
| <b>Results</b>         |     |                                                                                                                                                                                                              |                                       |
| Participants           | 13* | (a) Report numbers of individuals at each stage of study—eg numbers potentially eligible, examined for eligibility, confirmed eligible, included in the study, completing follow-up, and analysed            | Page 8-9; Table 1; Table 2            |
|                        |     | (b) Give reasons for non-participation at each stage                                                                                                                                                         | Not application                       |
|                        |     | (c) Consider use of a flow diagram                                                                                                                                                                           | Not application                       |
| Descriptive data       | 14* | (a) Give characteristics of study participants (eg demographic, clinical, social) and information on exposures and potential confounders                                                                     | Page 8-9; Table 1; Table 2            |
|                        |     | (b) Indicate number of participants with missing data for each variable of interest                                                                                                                          | Not application                       |
| Outcome data           | 15* | Report numbers of outcome events or summary measures                                                                                                                                                         | Page 8-9; Table 1                     |
| Main results           | 16  | (a) Give unadjusted estimates and, if applicable, confounder-adjusted estimates and their precision (eg, 95% confidence interval). Make clear which confounders were adjusted for and why they were included | Page 9-10; Table 4; Table 6           |
|                        |     | (b) Report category boundaries when continuous variables were categorized                                                                                                                                    | Page 6-8; Table 1; Table 2; Table 3 ; |

|                          |    |                                                                                                                                                                            |                     |
|--------------------------|----|----------------------------------------------------------------------------------------------------------------------------------------------------------------------------|---------------------|
|                          |    |                                                                                                                                                                            | Table 6             |
|                          |    | (c) If relevant, consider translating estimates of relative risk into absolute risk for a meaningful time period                                                           | Not application     |
| Other analyses           | 17 | Report other analyses done—eg analyses of subgroups and interactions, and sensitivity analyses                                                                             | Page 10-11; Table 6 |
| <b>Discussion</b>        |    |                                                                                                                                                                            |                     |
| Key results              | 18 | Summarise key results with reference to study objectives                                                                                                                   | Page 12-14          |
| Limitations              | 19 | Discuss limitations of the study, taking into account sources of potential bias or imprecision. Discuss both direction and magnitude of any potential bias                 | Page 14             |
| Interpretation           | 20 | Give a cautious overall interpretation of results considering objectives, limitations, multiplicity of analyses, results from similar studies, and other relevant evidence | Page 12-14          |
| Generalisability         | 21 | Discuss the generalisability (external validity) of the study results                                                                                                      | Page 13             |
| <b>Other information</b> |    |                                                                                                                                                                            |                     |
| Funding                  | 22 | Give the source of funding and the role of the funders for the present study and, if applicable, for the original study on which the present article is based              | Page 14-15          |

\*Give information separately for cases and controls in case-control studies and, if applicable, for exposed and unexposed groups in cohort and cross-sectional studies.

**Note:** An Explanation and Elaboration article discusses each checklist item and gives methodological background and published examples of transparent reporting. The STROBE checklist is best used in conjunction with this article (freely available on the Web sites of PLoS Medicine at <http://www.plosmedicine.org/>, Annals of Internal Medicine at <http://www.annals.org/>, and Epidemiology at <http://www.epidem.com/>). Information on the STROBE Initiative is available at [www.strobe-statement.org](http://www.strobe-statement.org).
